# Supplementary material for: The Mechanism of Lavender Essential Oil in the Treatment of Acute Colitis Based on “Quantity–Effect” Weight Coefficient Network Pharmacology
Source: Front Pharmacol. 2021 Apr 22;12:644140. doi: 10.3389/fphar.2021.644140 (PMC8107818; doi:10.3389/fphar.2021.644140)
Supplement: Supplementary file 5 [file table1.xlsx]

## Sheet: Sheet1
After BP weight coefficient ranking			Before BP weight coefficient ranking
Description	Weight score		Description	Pvalue
regulation of inflammatory response	39027.9		cellular calcium ion homeostasis	5.67921e-26
regulation of MAP kinase activity	38626.2		response to molecule of bacterial origin	7.63027e-26
positive regulation of protein serine/threonine kinase activity	38239.2		response to lipopolysaccharide	9.45611e-26
rhythmic process	37700.4		calcium ion homeostasis	1.59214e-25
cellular response to chemical stress	36197.8		regulation of MAP kinase activity	2.21294e-25
positive regulation of MAP kinase activity	35262.8		positive regulation of MAP kinase activity	1.02587e-24
activation of protein kinase activity	35107.3		cellular divalent inorganic cation homeostasis	1.14423e-24
response to nutrient levels	34915.7		positive regulation of protein serine/threonine kinase activity	3.68309e-24
circadian rhythm	34370.9		ERK1 and ERK2 cascade	5.77729e-24
response to metal ion	34221.8		rhythmic process	8.65603e-24
response to drug	32861.9		regulation of cytosolic calcium ion concentration	1.20149e-23
regulation of peptide secretion	32758		response to drug	4.36576e-23
response to oxidative stress	32671		regulation of inflammatory response	4.69635e-23
second-messenger-mediated signaling	32198.3		regulation of ERK1 and ERK2 cascade	1.2036e-22
cellular calcium ion homeostasis	32112.2		circadian rhythm	1.39531e-22
calcium ion homeostasis	32112.2		cellular response to chemical stress	1.79419e-22
cellular divalent inorganic cation homeostasis	32112.2		positive regulation of cytosolic calcium ion concentration	6.08044e-22
protein secretion	31974.3		icosanoid metabolic process	1.15871e-21
establishment of protein localization to extracellular region	31974.3		positive regulation of ERK1 and ERK2 cascade	1.41975e-21
protein localization to extracellular region	31974.3		response to metal ion	3.29388e-21
regulation of trans-synaptic signaling	31871.3		arachidonic acid metabolic process	7.46968e-20
regulation of lipid metabolic process	31464		peptidyl-serine modification	2.01129e-19
peptidyl-tyrosine phosphorylation	31006.9		response to reactive oxygen species	2.17362e-19
peptidyl-tyrosine modification	31006.9		unsaturated fatty acid metabolic process	2.54271e-19
regulation of protein secretion	30963		peptidyl-serine phosphorylation	2.67448e-19
modulation of chemical synaptic transmission	30932.4		phosphatidylinositol 3-kinase signaling	2.90455e-19
positive regulation of protein transport	30747.5		fatty acid derivative metabolic process	3.66635e-19
positive regulation of establishment of protein localization	30747.5		response to oxidative stress	4.65655e-19
regulation of cytosolic calcium ion concentration	30680.9		regulation of lipid metabolic process	5.83462e-19
response to steroid hormone	30040.6		regulation of phosphatidylinositol 3-kinase signaling	1.25406e-18
positive regulation of secretion	28932.6		vascular process in circulatory system	2.60561e-18
regulation of small molecule metabolic process	28710.1		cellular response to oxidative stress	2.80181e-18
cellular response to oxidative stress	28613		phosphatidylinositol-mediated signaling	3.33876e-18
fatty acid metabolic process	28433.2		second-messenger-mediated signaling	3.36062e-18
muscle cell proliferation	27813.8		fatty acid metabolic process	3.42207e-18
response to molecule of bacterial origin	27751.3		response to oxygen levels	3.42207e-18
response to lipopolysaccharide	27730.6		inositol lipid-mediated signaling	5.43386e-18
response to peptide hormone	27695.6		peptidyl-tyrosine phosphorylation	5.80565e-18
regulation of cell-cell adhesion	27495.2		peptidyl-tyrosine modification	7.29885e-18
regulation of membrane potential	27419.8		activation of protein kinase activity	1.66686e-17
cellular response to external stimulus	26817		calcium ion transport	2.90299e-17
ERK1 and ERK2 cascade	26815.8		long-chain fatty acid metabolic process	4.20221e-17
negative regulation of transport	26640.8		cellular response to reactive oxygen species	4.22317e-17
carboxylic acid transport	26395.5		G protein-coupled receptor signaling pathway, coupled to cyclic nucleotide second messenger	4.51182e-17
organic acid transport	26395.5		regulation of cell-cell adhesion	6.94062e-17
calcium ion transport	26155.6		muscle cell proliferation	8.00075e-17
divalent metal ion transport	26155.6		DNA-templated transcription, initiation	1.2981e-16
divalent inorganic cation transport	26155.6		olefinic compound metabolic process	1.59089e-16
reproductive structure development	25978.6		positive regulation of phosphatidylinositol 3-kinase signaling	1.71335e-16
reproductive system development	25978.6		regulation of tube diameter	2.55755e-16
regulation of DNA-binding transcription factor activity	25818.3		regulation of blood vessel diameter	2.55755e-16
regulation of apoptotic signaling pathway	25766.7		cellular response to peptide	2.8309e-16
maintenance of location	25739.6		regulation of tube size	2.9404e-16
positive regulation of cytosolic calcium ion concentration	25690.9		transcription initiation from RNA polymerase II promoter	4.16861e-16
cellular response to peptide	25665.2		divalent metal ion transport	5.23341e-16
peptidyl-serine modification	25495.5		response to nutrient levels	5.90513e-16
intracellular receptor signaling pathway	25414.3		regulation of peptide secretion	7.1509e-16
lipid localization	25211.6		regulation of protein secretion	7.61276e-16
DNA-templated transcription, initiation	25066.4		divalent inorganic cation transport	7.96489e-16
positive regulation of catabolic process	25043.1		positive regulation of protein transport	8.80355e-16
G protein-coupled receptor signaling pathway, coupled to cyclic nucleotide second messenger	24973.3		response to peptide hormone	8.86466e-16
positive regulation of secretion by cell	24941.2		response to hypoxia	1.26071e-15
organic hydroxy compound transport	24900.1		platelet activation	1.85731e-15
regulation of ERK1 and ERK2 cascade	24734.5		protein secretion	2.20634e-15
response to toxic substance	24733.9		establishment of protein localization to extracellular region	2.34164e-15
reactive oxygen species metabolic process	24440.4		cell chemotaxis	2.68497e-15
transcription initiation from RNA polymerase II promoter	24334		positive regulation of establishment of protein localization	2.72165e-15
lipid transport	24272.7		response to decreased oxygen levels	2.91493e-15
organ growth	24225.6		protein localization to extracellular region	3.53661e-15
gland development	24040.8		response to alcohol	3.64158e-15
peptidyl-serine phosphorylation	23916.3		reactive oxygen species metabolic process	3.98506e-15
anatomical structure homeostasis	23749.8		sensory perception of pain	4.54946e-15
negative regulation of immune system process	23532.4		fatty acid biosynthetic process	1.09757e-14
regulation of developmental growth	23268.8		muscle system process	2.06275e-14
positive regulation of cellular catabolic process	23248.1		leukocyte proliferation	2.71967e-14
regulation of binding	23128.4		blood coagulation	2.76483e-14
response to reactive oxygen species	22943		response to steroid hormone	3.39489e-14
cellular response to peptide hormone stimulus	22770		adenylate cyclase-modulating G protein-coupled receptor signaling pathway	3.43705e-14
regulation of circadian rhythm	22574.9		reproductive structure development	3.59907e-14
cellular response to extracellular stimulus	22570.8		hemostasis	3.88824e-14
steroid metabolic process	22431.9		coagulation	4.15973e-14
vascular process in circulatory system	22361.3		positive regulation of cytokine production	4.52902e-14
regulation of neuron death	22247		reproductive system development	4.52902e-14
neuron death	22247		regulation of circadian rhythm	5.09113e-14
regulation of intracellular transport	22232.4		intracellular receptor signaling pathway	5.34568e-14
regulation of metal ion transport	22224.7		organ growth	7.41458e-14
response to alcohol	21948.8		regulation of leukocyte cell-cell adhesion	8.47248e-14
activation of MAPK activity	21749.7		cellular response to peptide hormone stimulus	9.07618e-14
regulation of neurotransmitter levels	21723.3		monocarboxylic acid biosynthetic process	1.05345e-13
stress-activated protein kinase signaling cascade	21706.9		icosanoid biosynthetic process	1.09192e-13
regulation of intracellular protein transport	21694.1		smooth muscle contraction	1.25071e-13
negative regulation of response to external stimulus	21605.2		regulation of calcium ion transport	1.87163e-13
positive regulation of cellular protein localization	21582.1		regulation of DNA-binding transcription factor activity	4.69524e-13
lipid catabolic process	21455.4		lipid transport	6.56872e-13
adenylate cyclase-modulating G protein-coupled receptor signaling pathway	21383		regulation of metal ion transport	7.82064e-13
alcohol metabolic process	21346.8		steroid metabolic process	8.08335e-13
regulation of blood pressure	21291.3		leukocyte cell-cell adhesion	8.20874e-13
hormone-mediated signaling pathway	21113.6		phospholipase C-activating G protein-coupled receptor signaling pathway	9.71236e-13
positive regulation of ERK1 and ERK2 cascade	20978.5		cellular response to metal ion	9.76346e-13
regeneration	20774.7		cellular response to inorganic substance	1.17203e-12
regulation of tube diameter	20723		response to toxic substance	1.33254e-12
regulation of blood vessel diameter	20723		positive regulation of secretion	1.34895e-12
regulation of tube size	20723		lipid localization	1.35598e-12
regulation of hormone secretion	20618.5		monocarboxylic acid transport	1.69345e-12
hormone secretion	20618.5		lymphocyte proliferation	1.80613e-12
hormone transport	20618.5		regulation of reactive oxygen species metabolic process	1.85074e-12
muscle system process	20449.4		positive regulation of ion transport	1.93826e-12
negative regulation of catabolic process	20444		negative regulation of transport	1.99189e-12
negative regulation of phosphorylation	20421.7		mononuclear cell proliferation	2.23026e-12
aging	20396.8		positive regulation of lipid metabolic process	2.23577e-12
cellular response to metal ion	20255.6		positive regulation of protein kinase B signaling	2.50107e-12
cellular response to inorganic substance	20255.6		activation of MAPK activity	3.07353e-12
neurotransmitter transport	20231.6		regulation of small molecule metabolic process	3.12442e-12
protein autophosphorylation	20155		cellular response to external stimulus	4.11349e-12
cellular ketone metabolic process	20067.1		positive regulation of cell adhesion	4.57382e-12
positive regulation of cell adhesion	20054.5		stress-activated protein kinase signaling cascade	5.77058e-12
myeloid cell differentiation	20032.1		regulation of blood pressure	5.80094e-12
response to oxygen levels	19995.2		carboxylic acid biosynthetic process	6.86271e-12
phosphatidylinositol-mediated signaling	19959.6		organic acid biosynthetic process	7.2685e-12
inositol lipid-mediated signaling	19959.6		response to cadmium ion	7.67523e-12
phosphatidylinositol 3-kinase signaling	19913.8		fatty acid transport	9.8944e-12
negative regulation of defense response	19652.7		protein kinase B signaling	1.02213e-11
cellular response to steroid hormone stimulus	19645.3		positive regulation of cell-cell adhesion	1.09428e-11
stress-activated MAPK cascade	19625.5		lipid catabolic process	1.1629e-11
positive regulation of ion transport	19610.2		cellular response to cadmium ion	1.17527e-11
cell chemotaxis	19553.8		calcium-mediated signaling	1.17851e-11
response to mechanical stimulus	19538.9		T cell activation	1.18098e-11
positive regulation of cytokine production	19521.3		positive regulation of smooth muscle cell proliferation	1.30071e-11
response to ketone	19469.1		fatty acid derivative biosynthetic process	1.30071e-11
cellular response to abiotic stimulus	19446.6		positive regulation of secretion by cell	1.33189e-11
cellular response to environmental stimulus	19446.6		regulation of protein kinase B signaling	1.42459e-11
carboxylic acid biosynthetic process	19350.6		response to alkaloid	1.48793e-11
organic acid biosynthetic process	19350.6		multi-multicellular organism process	1.61232e-11
positive regulation of peptide secretion	19222.7		regulation of smooth muscle cell proliferation	1.64691e-11
cellular response to reactive oxygen species	19185.2		stress-activated MAPK cascade	1.74979e-11
dephosphorylation	19065.5		carboxylic acid transport	1.75223e-11
negative regulation of secretion	19054.4		regulation of muscle system process	1.76602e-11
negative regulation of secretion by cell	18969.7		hormone-mediated signaling pathway	1.80522e-11
regulation of leukocyte cell-cell adhesion	18931.8		response to ketone	1.80522e-11
leukocyte cell-cell adhesion	18931.8		alcohol metabolic process	1.87655e-11
sensory perception of pain	18918.8		smooth muscle cell proliferation	1.98121e-11
negative regulation of protein phosphorylation	18868.9		organic acid transport	2.08248e-11
peptide hormone secretion	18823.5		positive regulation of small molecule metabolic process	2.84075e-11
epithelial cell proliferation	18769.4		positive regulation of leukocyte cell-cell adhesion	3.18853e-11
regulation of peptide hormone secretion	18766.6		myeloid cell differentiation	3.28496e-11
monocarboxylic acid biosynthetic process	18737.6		anatomical structure homeostasis	3.51471e-11
neurotransmitter secretion	18554.4		acute inflammatory response	3.66529e-11
signal release from synapse	18554.4		protein autophosphorylation	3.6947e-11
response to radiation	18471.3		organic hydroxy compound transport	4.05159e-11
positive regulation of lipid metabolic process	18453.4		collagen metabolic process	4.68564e-11
regulation of phosphatidylinositol 3-kinase signaling	18438.9		regulation of leukocyte migration	4.77968e-11
gliogenesis	18425.7		gland development	5.90418e-11
regulation of reactive oxygen species metabolic process	18425.4		unsaturated fatty acid biosynthetic process	6.24022e-11
response to nutrient	18403.3		positive regulation of lipase activity	6.42395e-11
temperature homeostasis	18388.3		glucose homeostasis	6.56572e-11
T cell activation	18314.8		carbohydrate homeostasis	7.04391e-11
ossification	18134.1		response to nicotine	7.39405e-11
phagocytosis	18112		regulation of apoptotic signaling pathway	8.04335e-11
protein localization to nucleus	18040		hormone metabolic process	9.51629e-11
vesicle-mediated transport in synapse	18006		vascular endothelial growth factor receptor signaling pathway	9.77944e-11
blood coagulation	17924.4		regulation of trans-synaptic signaling	1.04074e-10
hemostasis	17924.4		cellular response to extracellular stimulus	1.1415e-10
coagulation	17924.4		positive regulation of cell activation	1.19224e-10
negative regulation of neuron death	17912.1		female pregnancy	1.20228e-10
protein kinase B signaling	17870.4		long-chain fatty acid biosynthetic process	1.21995e-10
regulation of regulated secretory pathway	17826.2		response to nutrient	1.38802e-10
regulation of exocytosis	17826.2		response to hydrogen peroxide	1.41247e-10
cellular response to nutrient levels	17732.2		regulation of neuron death	1.51184e-10
response to hypoxia	17709.7		adenylate cyclase-activating G protein-coupled receptor signaling pathway	1.55716e-10
response to decreased oxygen levels	17709.7		maternal process involved in female pregnancy	1.57669e-10
positive regulation of synaptic transmission	17666.3		exogenous drug catabolic process	1.69044e-10
protein dephosphorylation	17662.7		regeneration	1.78645e-10
regulation of calcium ion transport	17493		maintenance of location	1.79468e-10
excitatory postsynaptic potential	17480.3		temperature homeostasis	1.80166e-10
chemical synaptic transmission, postsynaptic	17480.3		leukocyte chemotaxis	2.11354e-10
regulation of postsynaptic membrane potential	17480.3		regulation of peptidyl-tyrosine phosphorylation	2.21453e-10
positive regulation of protein secretion	17427.7		muscle contraction	2.21704e-10
positive regulation of small molecule metabolic process	17403.3		reactive oxygen species biosynthetic process	2.55354e-10
calcium-mediated signaling	17371.2		positive regulation of fibroblast proliferation	2.78882e-10
regulation of blood circulation	17343.3		regulation of hormone secretion	2.86256e-10
negative regulation of cell activation	17317.9		negative regulation of blood vessel diameter	2.86272e-10
positive regulation of cell cycle	17312.9		response to mechanical stimulus	3.28807e-10
negative regulation of cell adhesion	17236.6		leukocyte apoptotic process	3.38777e-10
hormone metabolic process	17186.3		cognition	3.40958e-10
regulation of lipid localization	17177.8		activation of MAPKK activity	3.41842e-10
negative regulation of inflammatory response	17151.1		drug catabolic process	3.5205e-10
negative regulation of binding	17119.9		regulation of leukocyte proliferation	3.67287e-10
glucose homeostasis	17095.5		Fc receptor signaling pathway	3.92947e-10
carbohydrate homeostasis	17095.5		positive regulation of inflammatory response	4.33737e-10
regulation of smooth muscle cell proliferation	17068.1		negative regulation of cholesterol storage	4.36749e-10
smooth muscle cell proliferation	17068.1		modulation of chemical synaptic transmission	5.50653e-10
purine-containing coMPOund metabolic process	16983.7		histone phosphorylation	5.99087e-10
purine nucleotide metabolic process	16937.9		calcium ion transmembrane transport	6.04009e-10
cognition	16925.7		negative regulation of secretion	6.66008e-10
multi-multicellular organism process	16921.4		receptor biosynthetic process	6.86683e-10
regulation of peptidyl-tyrosine phosphorylation	16876.7		regulation of cholesterol storage	6.91026e-10
regulation of organ growth	16865.1		positive regulation of defense response	7.09858e-10
positive regulation of proteolysis	16808.8		response to amyloid-beta	7.39196e-10
negative regulation of cell development	16719.2		response to insulin	7.64477e-10
monocarboxylic acid transport	16649.1		positive regulation of peptide secretion	8.38842e-10
steroid hormone mediated signaling pathway	16627.4		negative regulation of secretion by cell	8.68319e-10
positive regulation of defense response	16572.2		aging	8.8958e-10
nucleocytoplasmic transport	16523.7		negative regulation of inflammatory response	1.05211e-09
nuclear transport	16523.7		peptide hormone secretion	1.10837e-09
positive regulation of growth	16507		cellular response to ketone	1.19463e-09
calcium ion transmembrane transport	16421		neuron death	1.22149e-09
regulation of insulin secretion	16366.1		neuroinflammatory response	1.24323e-09
insulin secretion	16366.1		regulation of lipid localization	1.31395e-09
regulation of mitochondrial membrane potential	16365		ERBB signaling pathway	1.34761e-09
positive regulation of cell activation	16339.5		regulation of chemotaxis	1.34867e-09
striated muscle tissue development	16243.7		positive regulation of protein secretion	1.42501e-09
muscle tissue development	16243.7		positive regulation of blood vessel diameter	1.50373e-09
regulation of autophagy	16207.1		response to ethanol	1.5688e-09
synaptic vesicle exocytosis	16117		cholesterol storage	1.65067e-09
synaptic vesicle cycle	16117		regulation of T cell activation	1.77738e-09
urogenital system development	16069		positive regulation of protein localization to nucleus	1.89165e-09
regulation of response to biotic stimulus	16063		positive regulation of leukocyte activation	1.90943e-09
cellular response to monoamine stimulus	15965		regulation of lipase activity	1.91878e-09
cellular response to catecholamine stimulus	15965		positive regulation of phospholipase activity	2.10195e-09
response to monoamine	15965		positive regulation of leukocyte proliferation	2.10588e-09
response to catecholamine	15965		positive regulation of phospholipase C activity	2.27379e-09
cellular response to dopamine	15965		negative regulation of defense response	2.29549e-09
response to dopamine	15965		regulation of lipid biosynthetic process	2.33402e-09
response to temperature stimulus	15955.7		regulation of blood circulation	2.38388e-09
homeostasis of number of cells	15947.5		lipid modification	2.58175e-09
regulation of epithelial cell proliferation	15941.5		regulation of fibroblast proliferation	2.82773e-09
positive regulation of intracellular protein transport	15855.8		regulation of insulin secretion	2.8875e-09
positive regulation of intracellular transport	15855.8		phospholipid metabolic process	3.03509e-09
fatty acid derivative metabolic process	15846.7		fibroblast proliferation	3.2213e-09
regulation of leukocyte migration	15751.2		regulation of cytokine-mediated signaling pathway	3.35924e-09
negative regulation of leukocyte activation	15650.6		cellular response to monoamine stimulus	3.36849e-09
regulation of protein kinase B signaling	15650.5		cellular response to catecholamine stimulus	3.36849e-09
leukocyte proliferation	15649.1		positive regulation of reactive oxygen species metabolic process	3.36849e-09
glial cell differentiation	15616.5		regulation of phospholipase C activity	3.39308e-09
positive regulation of inflammatory response	15477.1		regulation of smooth muscle contraction	3.39612e-09
phospholipid metabolic process	15475.5		excretion	3.39612e-09
regulation of innate immune response	15398.5		placenta development	3.51846e-09
regulation of anion transport	15395.4		regulation of peptide hormone secretion	3.53002e-09
cell growth	15385.4		negative regulation of lipid storage	3.56115e-09
negative regulation of cell-cell adhesion	15292.3		regulation of neuron apoptotic process	3.77691e-09
cardiac muscle tissue development	15220.1		cellular response to biotic stimulus	4.00586e-09
peptidyl-threonine phosphorylation	15197.6		calcium ion transport into cytosol	4.15372e-09
peptidyl-threonine modification	15197.6		adenylate cyclase-inhibiting G protein-coupled receptor signaling pathway	4.15843e-09
regulation of lipid biosynthetic process	15195.3		regulation of leukocyte apoptotic process	4.15843e-09
female pregnancy	15136.5		negative regulation of immune system process	4.2236e-09
negative regulation of locomotion	15099.3		hormone secretion	4.28815e-09
endomembrane system organization	15093.5		positive regulation of cellular catabolic process	5.08065e-09
regulation of synaptic transmission, glutamatergic	15088.8		response to monoamine	5.17097e-09
synaptic transmission, glutamatergic	15088.8		response to catecholamine	5.17097e-09
regulation of amine transport	15023.5		secondary alcohol metabolic process	5.74709e-09
amine transport	15023.5		regulation of pri-miRNA transcription by RNA polymerase II	5.97404e-09
glycerolipid metabolic process	15021.8		negative regulation of response to external stimulus	6.22391e-09
regulation of immune effector process	14996.3		cellular response to dopamine	6.7934e-09
unsaturated fatty acid metabolic process	14937.9		hormone transport	6.80548e-09
maintenance of location in cell	14932.7		regulation of receptor biosynthetic process	7.08714e-09
ribose phosphate metabolic process	14910		cyclic-nucleotide-mediated signaling	7.27781e-09
icosanoid metabolic process	14907.8		response to vitamin	7.65026e-09
lipid modification	14810.6		response to dopamine	7.65026e-09
regulation of cytokine-mediated signaling pathway	14794.9		steroid hormone mediated signaling pathway	7.83238e-09
regulation of response to cytokine stimulus	14794.9		T cell proliferation	8.0074e-09
response to alkaloid	14789.7		cellular response to insulin stimulus	8.26316e-09
regulation of neuron apoptotic process	14685.4		pri-miRNA transcription by RNA polymerase II	8.53063e-09
neuron apoptotic process	14685.4		calcium ion transmembrane import into cytosol	8.54745e-09
organelle fission	14682.3		regulation of response to cytokine stimulus	8.5838e-09
positive regulation of blood vessel diameter	14649.5		learning or memory	9.19222e-09
neutrophil degranulation	14607.9		tumor necrosis factor production	9.51877e-09
neutrophil activation involved in immune response	14607.9		regulation of organ growth	9.51877e-09
extrinsic apoptotic signaling pathway	14589.6		regulation of binding	9.81046e-09
monovalent inorganic cation homeostasis	14587.5		negative regulation of binding	9.92284e-09
membrane depolarization	14582.7		peptidyl-threonine phosphorylation	1.05004e-08
regulation of ATP metabolic process	14572.6		cAMP-mediated signaling	1.05477e-08
ATP metabolic process	14572.6		regulation of phospholipase activity	1.08805e-08
cyclic-nucleotide-mediated signaling	14529.5		regulation of intracellular protein transport	1.15392e-08
neuroinflammatory response	14524.6		release of sequestered calcium ion into cytosol	1.15719e-08
positive regulation of smooth muscle cell proliferation	14476.4		positive regulation of chemotaxis	1.20366e-08
cardiocyte differentiation	14455.2		negative regulation of sequestering of calcium ion	1.27408e-08
cellular response to biotic stimulus	14434.6		tumor necrosis factor superfamily cytokine production	1.27408e-08
regulation of Wnt signaling pathway	14433.9		positive regulation of cellular protein localization	1.41991e-08
negative regulation of nervous system development	14365		long-chain fatty acid transport	1.42285e-08
response to hydrogen peroxide	14361.5		animal organ regeneration	1.42285e-08
glial cell activation	14284.2		positive regulation of catabolic process	1.465e-08
histone modification	14270.4		regulation of sequestering of calcium ion	1.54016e-08
covalent chromatin modification	14270.4		positive regulation of DNA-binding transcription factor activity	1.61044e-08
striated muscle cell proliferation	14220.5		positive regulation of blood circulation	1.62212e-08
regulation of chemotaxis	14199.9		regulation of hemopoiesis	1.65206e-08
leukocyte chemotaxis	14189.2		cellular response to steroid hormone stimulus	1.68199e-08
activation of MAPKK activity	14188.1		negative regulation of cell activation	1.79516e-08
response to insulin	14187.8		peptidyl-tyrosine autophosphorylation	1.85654e-08
regulation of protein localization to nucleus	14171.7		cellular response to lipopolysaccharide	1.91523e-08
muscle organ development	14159.8		phagocytosis	1.91895e-08
negative regulation of protein transport	14146.2		tissue remodeling	1.92797e-08
negative regulation of establishment of protein localization	14146.2		cytosolic calcium ion transport	1.92797e-08
olefinic compound metabolic process	14123.8		sequestering of calcium ion	2.03329e-08
purine ribonucleotide metabolic process	14108.6		vasoconstriction	2.09602e-08
ribonucleotide metabolic process	14108.6		regulation of wound healing	2.13494e-08
regulation of protein catabolic process	14010.1		macrophage activation	2.32381e-08
regulation of nucleocytoplasmic transport	13971.4		peptidyl-threonine modification	2.43642e-08
positive regulation of cell cycle process	13895.1		negative regulation of neuron death	2.47224e-08
eye development	13891.9		cholesterol metabolic process	2.50044e-08
visual system development	13891.9		positive regulation of intracellular protein transport	2.55749e-08
sensory system development	13891.9		neuron apoptotic process	2.5904e-08
negative regulation of apoptotic signaling pathway	13837.2		insulin secretion	2.63278e-08
receptor metabolic process	13836.5		regulation of lipid catabolic process	2.65422e-08
regulation of neurotransmitter transport	13800.6		glial cell activation	2.65422e-08
muscle cell differentiation	13760.1		regulation of protein localization to nucleus	2.6637e-08
regulation of lipid transport	13747.3		positive regulation of T cell activation	2.80277e-08
steroid biosynthetic process	13745.8		mast cell activation	3.08279e-08
excretion	13744.4		negative regulation of ion transport	3.40537e-08
positive regulation of DNA-binding transcription factor activity	13730.4		regulation of circadian sleep/wake cycle, sleep	3.57475e-08
fatty acid biosynthetic process	13725.1		regulation of lymphocyte proliferation	3.81233e-08
regulation of neurotransmitter secretion	13715.8		striated muscle cell proliferation	3.85399e-08
placenta development	13702.5		prostaglandin biosynthetic process	3.93135e-08
regulation of synaptic vesicle exocytosis	13679.6		prostanoid biosynthetic process	3.93135e-08
regulation of synaptic vesicle cycle	13679.6		cardiac muscle tissue growth	4.26533e-08
calcium ion transport into cytosol	13637.1		epithelial cell development	4.30136e-08
cytosolic calcium ion transport	13637.1		cellular response to nutrient levels	4.30136e-08
positive regulation of reactive oxygen species metabolic process	13631.9		regulation of mononuclear cell proliferation	4.30136e-08
regulation of cell growth	13609.2		monoamine transport	4.33127e-08
nucleotide biosynthetic process	13606.5		cellular response to molecule of bacterial origin	4.56667e-08
nucleoside phosphate biosynthetic process	13606.5		myeloid leukocyte migration	4.56667e-08
cell cycle G1/S phase transition	13600.6		homeostasis of number of cells	4.784e-08
regulation of peptidase activity	13589.8		drug metabolic process	4.82584e-08
negative regulation of transferase activity	13589.2		cellular hormone metabolic process	4.86434e-08
regulation of striated muscle tissue development	13558.3		regulation of regulated secretory pathway	4.94641e-08
regulation of muscle tissue development	13558.3		B cell activation	4.9942e-08
regulation of muscle organ development	13558.3		regulation of lipid transport	5.28544e-08
cellular lipid catabolic process	13553.9		negative regulation of lipid localization	5.46099e-08
positive regulation of phosphatidylinositol 3-kinase signaling	13526.2		regulation of tumor necrosis factor production	5.69487e-08
tissue homeostasis	13506.8		positive regulation of proteolysis	5.99816e-08
response to tumor necrosis factor	13471.7		positive regulation of peptidyl-tyrosine phosphorylation	6.10225e-08
positive regulation of mitotic cell cycle	13465.4		regulation of insulin receptor signaling pathway	6.26068e-08
positive regulation of cell-cell adhesion	13420.1		positive regulation of nucleocytoplasmic transport	6.26068e-08
canonical Wnt signaling pathway	13387.6		receptor metabolic process	7.3855e-08
regulation of leukocyte mediated immunity	13341.8		regulation of tumor necrosis factor superfamily cytokine production	7.53535e-08
regulation of chromosome organization	13337.7		positive regulation of mitotic cell cycle	7.60682e-08
regulation of ossification	13335.6		response to iron ion	8.01164e-08
response to cadmium ion	13287.6		regulation of cyclase activity	8.09733e-08
intrinsic apoptotic signaling pathway	13285.1		negative regulation of leukocyte apoptotic process	8.09733e-08
G1/S transition of mitotic cell cycle	13222.5		sterol metabolic process	8.15804e-08
camera-type eye development	13216		Fc-epsilon receptor signaling pathway	8.15804e-08
response to estrogen	13143.4		negative regulation of apoptotic signaling pathway	8.63964e-08
cardiac muscle tissue growth	13136.2		heart growth	9.03895e-08
heart growth	13136.2		regulation of amine transport	9.40048e-08
positive regulation of leukocyte activation	13099.5		positive regulation of tumor necrosis factor production	9.54504e-08
regulation of generation of precursor metabolites and energy	13088.3		icosanoid transport	9.54504e-08
long-chain fatty acid metabolic process	13075.7		fatty acid derivative transport	9.54504e-08
organic hydroxy compound biosynthetic process	13073.8		regulation of neurotransmitter levels	9.6635e-08
regulation of angiogenesis	13067.6		sleep	9.99072e-08
regulation of vasculature development	13067.6		positive regulation of vasoconstriction	9.99072e-08
embryonic organ development	13057.7		insulin receptor signaling pathway	1.00165e-07
intracellular steroid hormone receptor signaling pathway	13032.2		positive regulation of synaptic transmission	1.00338e-07
fatty acid transport	13029.8		cellular lipid catabolic process	1.02156e-07
regulation of T cell activation	13019.2		regulation of muscle contraction	1.07402e-07
JNK cascade	13016.4		isoprenoid metabolic process	1.08176e-07
epithelial cell development	13014.1		xenobiotic metabolic process	1.17948e-07
lipid homeostasis	12939.2		T cell receptor signaling pathway	1.20848e-07
hexose metabolic process	12866.3		regulation of lipid storage	1.31178e-07
monosaccharide metabolic process	12866.3		positive regulation of tumor necrosis factor superfamily cytokine production	1.31178e-07
regulation of organic acid transport	12865.8		regulation of circadian sleep/wake cycle	1.38256e-07
adenylate cyclase-activating G protein-coupled receptor signaling pathway	12863.7		circadian sleep/wake cycle, sleep	1.38256e-07
cAMP-mediated signaling	12863.7		regulation of neurotransmitter transport	1.40233e-07
positive regulation of apoptotic signaling pathway	12861.7		negative regulation of protein secretion	1.4201e-07
cellular response to ketone	12856.2		regulation of developmental growth	1.50591e-07
cellular response to lipopolysaccharide	12845.1		maternal placenta development	1.52031e-07
cellular response to molecule of bacterial origin	12845.1		regulation of platelet activation	1.52031e-07
regulation of ion transmembrane transport	12837.7		regulation of synaptic transmission, glutamatergic	1.53168e-07
calcium ion transmembrane import into cytosol	12835.6		glycerolipid metabolic process	1.55014e-07
cellular response to tumor necrosis factor	12833.6		negative regulation of neuron apoptotic process	1.57476e-07
interaction with host	12829.1		positive regulation of calcium ion transport	1.66175e-07
response to light stimulus	12815		positive regulation of cell cycle	1.72954e-07
positive regulation of binding	12805.7		positive regulation of lymphocyte activation	1.78034e-07
release of sequestered calcium ion into cytosol	12799.4		cellular response to xenobiotic stimulus	1.80673e-07
negative regulation of sequestering of calcium ion	12799.4		JNK cascade	1.82519e-07
regulation of sequestering of calcium ion	12799.4		immune response-activating cell surface receptor signaling pathway	1.84426e-07
sequestering of calcium ion	12799.4		immune response-activating signal transduction	1.84426e-07
arachidonic acid metabolic process	12789.5		positive regulation of cyclase activity	1.85264e-07
84.7329ptive thermogenesis	12778.6		cellular response to low-density lipoprotein particle stimulus	1.85264e-07
adenylate cyclase-inhibiting G protein-coupled receptor signaling pathway	12743.1		regulation of intracellular transport	1.85574e-07
regulation of canonical Wnt signaling pathway	12711.8		response to estrogen	1.94255e-07
positive regulation of protein kinase B signaling	12706.6		regulation of cellular response to insulin stimulus	1.94255e-07
learning or memory	12693.3		regulation of calcium ion transmembrane transport	1.95882e-07
muscle contraction	12611.2		terpenoid metabolic process	1.96282e-07
positive regulation of protein localization to nucleus	12602.8		regulation of response to wounding	2.06878e-07
regulation of protein binding	12594.1		amine transport	2.10364e-07
synapse organization	12588.5		positive regulation of fatty acid metabolic process	2.25403e-07
regulation of cardiac muscle tissue growth	12534.7		neutrophil degranulation	2.26459e-07
regulation of heart growth	12534.7		G protein-coupled adenosine receptor signaling pathway	2.29554e-07
regulation of cardiac muscle tissue development	12534.7		positive regulation of receptor biosynthetic process	2.29554e-07
negative regulation of immune response	12479.3		G protein-coupled purinergic receptor signaling pathway	2.29554e-07
negative regulation of lipid localization	12460.2		response to radiation	2.48544e-07
alcohol biosynthetic process	12456.4		neutrophil activation involved in immune response	2.50627e-07
monoamine transport	12452.8		negative regulation of peptide secretion	2.5429e-07
striated muscle cell differentiation	12443.9		regulation of leukocyte differentiation	2.64152e-07
regulation of muscle system process	12402.7		digestive system process	2.79127e-07
negative regulation of organelle organization	12387.8		regulation of response to biotic stimulus	2.84157e-07
response to ethanol	12325.8		positive regulation of intracellular transport	3.02914e-07
positive regulation of nucleocytoplasmic transport	12318.1		nitric oxide biosynthetic process	3.05918e-07
regulation of DNA binding	12295.6		regulation of glucose transmembrane transport	3.05918e-07
renal system process	12265.9		excitatory postsynaptic potential	3.06067e-07
entry into host	12263.9		epithelial cell proliferation	3.07195e-07
movement in host environment	12263.9		response to xenobiotic stimulus	3.17607e-07
negative regulation of neuron apoptotic process	12259		ossification	3.1773e-07
epithelial cell migration	12249.7		camera-type eye development	3.18652e-07
epithelium migration	12249.7		circadian sleep/wake cycle process	3.18837e-07
tissue migration	12249.7		decidualization	3.18837e-07
ameboidal-type cell migration	12249.7		regulation of response to interferon-gamma	3.18837e-07
smooth muscle contraction	12244.9		regulation of interferon-gamma-mediated signaling pathway	3.18837e-07
in utero embryonic development	12221.9		detection of stimulus involved in sensory perception of pain	3.18837e-07
negative regulation of neurogenesis	12168.6		positive regulation of protein import into nucleus	3.26548e-07
protein import	12156.8		positive regulation of pri-miRNA transcription by RNA polymerase II	3.26548e-07
negative regulation of cytokine production	12137.7		regulation of cardiac muscle tissue growth	3.41289e-07
protein maturation	12128.6		regulation of synaptic vesicle exocytosis	3.41289e-07
negative regulation of cellular catabolic process	12116.8		cellular ketone metabolic process	3.57619e-07
glutamate secretion	12097.2		regulation of neurotransmitter secretion	4.01058e-07
acidic amino acid transport	12097.2		regulation of vasoconstriction	4.12169e-07
dicarboxylic acid transport	12097.2		regulation of blood coagulation	4.22801e-07
animal organ regeneration	12096.7		regulation of reactive oxygen species biosynthetic process	4.38006e-07
reactive oxygen species biosynthetic process	12064.1		neurotransmitter transport	4.41624e-07
protein processing	12042		alcohol biosynthetic process	4.46759e-07
ERBB signaling pathway	12018.8		positive regulation of protein import	4.63405e-07
protein import into nucleus	11985.3		regulation of hemostasis	4.69536e-07
import into nucleus	11985.3		negative regulation of hormone secretion	4.6973e-07
small molecule catabolic process	11954.5		leukocyte mediated cytotoxicity	4.77903e-07
secondary alcohol metabolic process	11905.1		cardiac muscle tissue development	4.90581e-07
negative regulation of growth	11896.4		positive regulation of lymphocyte proliferation	5.01031e-07
negative regulation of mitotic cell cycle	11886.8		eye development	5.19276e-07
acute inflammatory response	11855.4		nitric oxide metabolic process	5.20683e-07
lymphocyte proliferation	11834.5		platelet aggregation	5.3403e-07
mononuclear cell proliferation	11834.5		positive regulation of mononuclear cell proliferation	5.39336e-07
positive regulation of peptidyl-tyrosine phosphorylation	11809.7		response to temperature stimulus	5.44359e-07
regulation of DNA metabolic process	11796.6		acid secretion	5.4814e-07
locomotory behavior	11749		regulation of innate immune response	5.66719e-07
regulation of cellular ketone metabolic process	11707.5		glucose transmembrane transport	5.67347e-07
response to endoplasmic reticulum stress	11682.4		cellular response to oxygen levels	6.03373e-07
regulation of hemopoiesis	11681.3		visual system development	6.03505e-07
regulation of endocytosis	11641.8		phospholipid biosynthetic process	6.06006e-07
negative regulation of synaptic transmission	11635.1		immune response-regulating cell surface receptor signaling pathway involved in phagocytosis	6.23776e-07
viral life cycle	11629.5		Fc-gamma receptor signaling pathway involved in phagocytosis	6.23776e-07
negative regulation of protein secretion	11614.7		leukocyte homeostasis	6.37617e-07
negative regulation of peptide secretion	11614.7		homotypic cell-cell adhesion	6.37617e-07
positive regulation of chemotaxis	11607.4		regulation of cation transmembrane transport	6.40177e-07
negative regulation of ion transport	11605.1		cell cycle G1/S phase transition	6.44865e-07
regulation of systemic arterial blood pressure	11565.1		regulation of macrophage migration	6.45518e-07
regulation of cell cycle phase transition	11506.2		positive regulation of vascular endothelial growth factor production	6.58989e-07
cellular response to insulin stimulus	11479.3		circadian sleep/wake cycle	6.58989e-07
heart process	11468.9		regulation of nucleocytoplasmic transport	6.7111e-07
positive regulation of transmembrane transport	11465.6		chemical synaptic transmission, postsynaptic	6.7111e-07
myeloid cell homeostasis	11439.7		regulation of heart growth	7.0416e-07
heart contraction	11432.7		reactive nitrogen species metabolic process	7.0416e-07
negative regulation of hydrolase activity	11409.2		digestion	7.1967e-07
viral entry into host cell	11400.9		sensory system development	7.53322e-07
renal system development	11399.9		cellular response to amyloid-beta	7.57012e-07
positive regulation of developmental growth	11382.8		positive regulation of leukocyte migration	7.72317e-07
regulation of heart contraction	11347.9		Fc-gamma receptor signaling pathway	7.72317e-07
regulation of synaptic transmission, GABAergic	11340.7		regulation of coagulation	7.76631e-07
synaptic transmission, GABAergic	11340.7		regulation of epithelial cell proliferation	7.81348e-07
regulation of cell cycle G1/S phase transition	11334.8		hexose transmembrane transport	7.91103e-07
response to axon injury	11326.5		protein localization to nucleus	7.99068e-07
negative regulation of leukocyte cell-cell adhesion	11284.4		regulation of monooxygenase activity	8.7211e-07
regulation of stress-activated MAPK cascade	11272.8		icosanoid secretion	8.84224e-07
regulation of stress-activated protein kinase signaling cascade	11272.8		neurotransmitter secretion	8.95087e-07
purinergic nucleotide receptor signaling pathway	11235.3		signal release from synapse	8.95087e-07
regulation of mitochondrion organization	11226.2		cellular response to hypoxia	8.96345e-07
isoprenoid metabolic process	11221.4		monosaccharide transmembrane transport	9.29439e-07
morphogenesis of a branching structure	11221.2		regulation of membrane potential	9.49677e-07
lipid oxidation	11218.9		Fc receptor mediated stimulatory signaling pathway	9.51194e-07
anatomical structure maturation	11212.8		myeloid leukocyte differentiation	9.98538e-07
developmental maturation	11212.8		positive regulation of transmembrane transport	9.98538e-07
regulation of endopeptidase activity	11162.4		regulation of oxidoreductase activity	1.00621e-06
response to purine-containing compound	11144.1		alpha-beta T cell activation	1.01844e-06
regulation of mitotic cell cycle phase transition	11128.1		regulation of macrophage chemotaxis	1.01887e-06
maternal process involved in female pregnancy	11105.1		response to acetylcholine	1.01887e-06
regulation of leukocyte proliferation	11101.2		cellular response to acetylcholine	1.01887e-06
cholesterol metabolic process	11088		response to amine	1.02889e-06
sterol metabolic process	11088		retinol metabolic process	1.02889e-06
axonogenesis	11079.5		mast cell degranulation	1.02889e-06
establishment of organelle localization	11022.1		negative regulation of blood pressure	1.02889e-06
fat cell differentiation	11019.8		regulation of tissue remodeling	1.0341e-06
regulation of reactive oxygen species biosynthetic process	11018		interferon-gamma-mediated signaling pathway	1.0341e-06
cell maturation	10972.4		regulation of leukocyte mediated immunity	1.05343e-06
regulation of G1/S transition of mitotic cell cycle	10956.7		positive regulation of epithelial cell proliferation	1.05343e-06
regulation of mitochondrial depolarization	10901.4		carbohydrate transmembrane transport	1.08845e-06
mitochondrial depolarization	10901.4		negative regulation of catabolic process	1.10876e-06
regulation of membrane depolarization	10901.4		regulation of ossification	1.11099e-06
regulation of cysteine-type endopeptidase activity	10885.3		mast cell activation involved in immune response	1.19287e-06
positive regulation of leukocyte cell-cell adhesion	10859.1		regulation of cell adhesion mediated by integrin	1.19287e-06
regulation of cysteine-type endopeptidase activity involved in apoptotic process	10849.1		response to cocaine	1.19287e-06
positive regulation of epithelial cell proliferation	10809.9		antigen receptor-mediated signaling pathway	1.2022e-06
regulation of lipid storage	10806.9		cardiac muscle cell proliferation	1.23264e-06
lipid storage	10806.9		G1/S transition of mitotic cell cycle	1.24645e-06
response to starvation	10804.6		negative regulation of lymphocyte apoptotic process	1.25133e-06
myeloid leukocyte differentiation	10756		lymphocyte differentiation	1.32816e-06
regulation of catecholamine secretion	10754.9		granulocyte migration	1.33114e-06
catecholamine secretion	10754.9		primary alcohol metabolic process	1.36224e-06
catecholamine transport	10754.9		maintenance of location in cell	1.37031e-06
astrocyte differentiation	10747.9		synaptic vesicle exocytosis	1.37143e-06
cardiac muscle cell proliferation	10745.7		regulation of behavior	1.37805e-06
epithelial tube morphogenesis	10740.4		mast cell mediated immunity	1.37818e-06
erythrocyte homeostasis	10737.6		regulation of acute inflammatory response	1.37818e-06
kidney development	10701.6		prostanoid metabolic process	1.37818e-06
DNA biosynthetic process	10599		prostaglandin metabolic process	1.37818e-06
cold-induced thermogenesis	10582.3		organic cation transport	1.37818e-06
regulation of cold-induced thermogenesis	10582.3		intrinsic apoptotic signaling pathway	1.41891e-06
negative regulation of protein kinase activity	10559.9		negative regulation of protein transport	1.42141e-06
negative regulation of kinase activity	10559.9		cellular response to decreased oxygen levels	1.51914e-06
regulation of purine nucleotide metabolic process	10559.9		negative regulation of leukocyte activation	1.52157e-06
regulation of nucleotide metabolic process	10559.9		ERBB2 signaling pathway	1.52539e-06
macrophage activation	10549.4		liver regeneration	1.52539e-06
epithelial cell apoptotic process	10549.2		cell adhesion mediated by integrin	1.53782e-06
cellular hormone metabolic process	10539.7		microglial cell activation	1.587e-06
cellular response to hydrogen peroxide	10517		leukocyte activation involved in inflammatory response	1.587e-06
connective tissue development	10501.2		epidermal growth factor receptor signaling pathway	1.59395e-06
DNA integrity checkpoint	10483.9		synaptic transmission, glutamatergic	1.62783e-06
cell cycle checkpoint	10483.9		cytokine secretion	1.71309e-06
regulation of steroid metabolic process	10458		myeloid cell homeostasis	1.72533e-06
DNA damage checkpoint	10447.7		B cell proliferation	1.7766e-06
glucose metabolic process	10437.2		regulation of mononuclear cell migration	1.82164e-06
regulation of synaptic plasticity	10333.7		negative regulation of establishment of protein localization	1.83861e-06
regulation of cation transmembrane transport	10315.6		adaptive thermogenesis	1.83861e-06
long-term synaptic potentiation	10297.4		response to amphetamine	1.84656e-06
tissue remodeling	10292.2		myeloid cell apoptotic process	1.84656e-06
sex differentiation	10283.3		purinergic nucleotide receptor signaling pathway	1.84656e-06
endocrine system development	10281.7		negative regulation of insulin receptor signaling pathway	1.84656e-06
positive regulation of immune effector process	10252.5		retinoic acid receptor signaling pathway	1.84656e-06
positive regulation of DNA metabolic process	10251.4		renal system process	1.84728e-06
response to amine	10248.3		regulation of exocytosis	1.86063e-06
cellular response to oxygen levels	10244.2		positive regulation of immune effector process	1.956e-06
cellular response to interferon-gamma	10234.1		positive regulation of macrophage chemotaxis	1.96041e-06
response to interferon-gamma	10234.1		negative regulation of T cell apoptotic process	1.96041e-06
positive regulation of lipase activity	10203.8		regulation of nitric-oxide synthase activity	2.0846e-06
regulation of lipase activity	10203.8		tissue homeostasis	2.09906e-06
terpenoid metabolic process	10197.8		glycerolipid catabolic process	2.11508e-06
collagen metabolic process	10184.7		granulocyte chemotaxis	2.13499e-06
regulation of cardiac muscle cell proliferation	10180.5		connective tissue development	2.19529e-06
positive regulation of chromosome organization	10165.3		cardiocyte differentiation	2.21859e-06
negative regulation of blood vessel diameter	10161.4		activation of phospholipase C activity	2.22085e-06
response to vitamin	10156		vasodilation	2.22085e-06
negative regulation of hormone secretion	10147.1		response to lipoprotein particle	2.22085e-06
sleep	10074.8		regulation of immune effector process	2.27558e-06
response to nicotine	10054.5		cellular response to hydrogen peroxide	2.29535e-06
regulation of fat cell differentiation	10044.7		regulation of myeloid cell differentiation	2.29544e-06
leukocyte apoptotic process	10020.7		negative regulation of synaptic transmission	2.34443e-06
forebrain development	10014.8		positive regulation of NF-kappaB transcription factor activity	2.35972e-06
positive regulation of hormone secretion	10011.9		regulation of fatty acid metabolic process	2.49502e-06
electron transport chain	10000.1		epoxygenase P450 pathway	2.58947e-06
positive regulation of neurogenesis	9999.25		leukotriene metabolic process	2.65475e-06
positive regulation of protein catabolic process	9975.18		regulation of synaptic transmission, GABAergic	2.65475e-06
negative regulation of cell migration	9964.3		cellular response to alkaloid	2.65475e-06
regulation of nervous system process	9903.37		negative regulation of cellular response to insulin stimulus	2.65475e-06
regulation of glutamate secretion	9900.8		regulation of cardiac muscle tissue development	2.70946e-06
regulation of amino acid transport	9900.8		glial cell differentiation	2.75449e-06
mitotic nuclear division	9894.58		extrinsic apoptotic signaling pathway	2.75449e-06
negative regulation of lipid storage	9867.99		gliogenesis	2.8673e-06
regulation of cholesterol storage	9867.99		response to acid chemical	3.03085e-06
cholesterol storage	9867.99		regulation of catecholamine secretion	3.07094e-06
positive regulation of leukocyte migration	9863.08		steroid biosynthetic process	3.10482e-06
positive regulation of striated muscle tissue development	9803.66		negative regulation of insulin secretion	3.15529e-06
positive regulation of muscle organ development	9803.66		cellular response to lipoprotein particle stimulus	3.15529e-06
positive regulation of muscle tissue development	9803.66		response to carbohydrate	3.17724e-06
positive regulation of calcium ion transport	9793.41		serotonin transport	3.36696e-06
xenobiotic metabolic process	9787		positive regulation of mitochondrial depolarization	3.3867e-06
cellular response to xenobiotic stimulus	9787		regulation of anion transport	3.45061e-06
response to xenobiotic stimulus	9787		regulation of lymphocyte apoptotic process	3.47564e-06
cell-substrate adhesion	9774.59		digestive tract development	3.71211e-06
regulation of protein stability	9770.29		postsynaptic signal transduction	3.73005e-06
regulation of behavior	9768.77		positive regulation of cellular amide metabolic process	3.80265e-06
negative regulation of T cell activation	9731.63		regulation of T cell proliferation	3.80265e-06
negative regulation of lymphocyte activation	9731.63		catecholamine secretion	3.92384e-06
cholesterol homeostasis	9683.8		macrophage migration	3.92384e-06
sterol homeostasis	9683.8		response to hexose	4.02331e-06
regulation of fibroblast proliferation	9681.35		regulation of adaptive immune response	4.02853e-06
fibroblast proliferation	9681.35		regulation of ion transmembrane transport	4.04525e-06
regulation of oxidoreductase activity	9674.5		regulation of cysteine-type endopeptidase activity	4.19887e-06
regulation of protein-containing complex assembly	9674.13		lipid storage	4.21331e-06
interferon-gamma-mediated signaling pathway	9659.48		B cell differentiation	4.23685e-06
epidermal growth factor receptor signaling pathway	9648.79		inflammatory cell apoptotic process	4.31658e-06
myeloid leukocyte migration	9641.44		regulation of mitochondrial depolarization	4.31658e-06
cardiac muscle cell differentiation	9627.37		response to retinoic acid	4.3597e-06
negative regulation of protein binding	9625.13		respiratory system development	4.45294e-06
regulation of extrinsic apoptotic signaling pathway	9595.58		regulation of reproductive process	4.51573e-06
Ras protein signal transduction	9589.34		neutral lipid metabolic process	4.52253e-06
cellular response to cadmium ion	9577.33		acylglycerol metabolic process	4.52253e-06
negative regulation of cell cycle process	9557.48		response to light stimulus	4.57489e-06
84.7329ptive immune response based on somatic recombination of immune receptors built from immunoglobulin superfamily domains	9554.8		response to tumor necrosis factor	4.75165e-06
glycerophospholipid metabolic process	9553.11		regulation of protein import into nucleus	4.96551e-06
regulation of receptor signaling pathway via JAK-STAT	9515.6		platelet-derived growth factor receptor signaling pathway	4.96551e-06
regulation of receptor signaling pathway via STAT	9515.6		regulation of cardiac muscle cell proliferation	4.96551e-06
receptor signaling pathway via JAK-STAT	9515.6		cell killing	5.05368e-06
receptor signaling pathway via STAT	9515.6		astrocyte differentiation	5.06614e-06
regulation of sterol transport	9509.67		response to monosaccharide	5.17314e-06
sterol transport	9509.67		serotonin secretion	5.27397e-06
T cell proliferation	9496.91		cyclooxygenase pathway	5.27397e-06
respiratory system development	9473.73		interleukin-27-mediated signaling pathway	5.27397e-06
positive regulation of cell cycle phase transition	9467.01		protein dephosphorylation	5.31909e-06
positive regulation of protein import into nucleus	9433.12		epithelial cell migration	5.35832e-06
positive regulation of protein import	9433.12		positive regulation of angiogenesis	5.43499e-06
regulation of protein import into nucleus	9433.12		sensory perception of temperature stimulus	5.46416e-06
regulation of protein import	9433.12		lipid oxidation	5.46713e-06
multicellular organismal response to stress	9385.39		liver development	5.4821e-06
regulation of response to endoplasmic reticulum stress	9373.33		response to estradiol	5.4821e-06
postsynaptic signal transduction	9358.33		regulation of receptor signaling pathway via JAK-STAT	5.8389e-06
cellular response to starvation	9344.17		epithelium migration	5.94203e-06
acid secretion	9342.29		one-carbon metabolic process	5.98399e-06
phospholipase C-activating G protein-coupled receptor signaling pathway	9338.14		regulation of protein binding	6.29178e-06
endothelial cell migration	9330.39		regulation of postsynaptic membrane potential	6.61322e-06
platelet activation	9310.2		hepaticobiliary system development	6.61322e-06
feeding behavior	9283.07		cold-induced thermogenesis	6.61322e-06
telencephalon development	9273.11		regulation of cold-induced thermogenesis	6.61322e-06
response to acid chemical	9253.97		lung development	6.65035e-06
negative regulation of autophagy	9242.42		diterpenoid metabolic process	6.80748e-06
neutral lipid metabolic process	9242.23		regulation of synaptic vesicle cycle	6.80748e-06
acylglycerol metabolic process	9242.23		acute inflammatory response to antigenic stimulus	6.83772e-06
regulation of macroautophagy	9231.18		mitochondrial depolarization	6.83772e-06
positive regulation of autophagy	9222.32		growth hormone receptor signaling pathway	6.83772e-06
peptidyl-tyrosine autophosphorylation	9199.13		urogenital system development	6.88477e-06
fatty acid derivative biosynthetic process	9164.6		positive regulation of B cell proliferation	6.94297e-06
regulation of protein dephosphorylation	9145.23		regulation of B cell proliferation	6.95228e-06
regulation of dephosphorylation	9145.23		regulation of protein import	6.95228e-06
extracellular matrix organization	9141.31		cellular response to carbohydrate stimulus	7.03263e-06
extracellular structure organization	9141.31		cellular response to abiotic stimulus	7.13911e-06
regulation of synapse organization	9115.19		cellular response to environmental stimulus	7.13911e-06
regulation of synapse structure or activity	9115.19		regulation of vascular associated smooth muscle cell proliferation	7.21575e-06
regulation of epithelial cell apoptotic process	9093.16		vascular associated smooth muscle cell proliferation	7.21575e-06
positive regulation of mitotic cell cycle phase transition	9088.92		tissue migration	7.28303e-06
regulation of endothelial cell proliferation	9085.89		regulation of cysteine-type endopeptidase activity involved in apoptotic process	7.6176e-06
endothelial cell proliferation	9085.89		mitotic nuclear envelope disassembly	7.83966e-06
response to corticosteroid	9038.82		interleukin-2-mediated signaling pathway	7.83966e-06
positive regulation of cellular protein catabolic process	9030.7		positive regulation of membrane depolarization	7.83966e-06
regulation of cellular protein catabolic process	9030.7		intracellular steroid hormone receptor signaling pathway	7.84955e-06
phospholipid biosynthetic process	9015.73		digestive system development	7.94091e-06
positive regulation of angiogenesis	9014.42		negative regulation of organ growth	8.0229e-06
positive regulation of vasculature development	9014.42		macrophage chemotaxis	8.0229e-06
regulation of leukocyte apoptotic process	8995.85		negative regulation of peptide hormone secretion	8.0229e-06
alpha-beta T cell activation	8994.13		hexose metabolic process	8.12574e-06
interleukin-6 production	8981.34		respiratory tube development	8.22839e-06
cellular carbohydrate metabolic process	8949.24		regulation of G protein-coupled receptor signaling pathway	8.43188e-06
signal transduction by p53 class mediator	8948.22		cellular response to growth hormone stimulus	8.46744e-06
regulation of response to interferon-gamma	8932.29		inflammatory response to antigenic stimulus	8.61264e-06
regulation of interferon-gamma-mediated signaling pathway	8932.29		bone resorption	8.61264e-06
negative regulation of cholesterol storage	8929.13		negative regulation of calcium ion transport	8.61264e-06
histone phosphorylation	8902.14		positive regulation of apoptotic signaling pathway	9.1331e-06
diterpenoid metabolic process	8897.53		regulation of bone resorption	9.23502e-06
regulation of epithelial cell migration	8870.64		response to fatty acid	9.29391e-06
Fc receptor signaling pathway	8860.92		organic hydroxy compound biosynthetic process	9.61012e-06
regulation of carbohydrate metabolic process	8830.43		carbohydrate transport	1.00654e-05
tumor necrosis factor production	8815.56		regulation of receptor signaling pathway via STAT	1.00654e-05
tumor necrosis factor superfamily cytokine production	8815.56		membrane depolarization	1.009e-05
regulation of cell-substrate adhesion	8810.65		ether metabolic process	1.03858e-05
regulation of circadian sleep/wake cycle, sleep	8804.04		positive regulation of macrophage migration	1.03858e-05
regulation of circadian sleep/wake cycle	8804.04		cellular response to nutrient	1.05913e-05
circadian sleep/wake cycle, sleep	8804.04		regulation of collagen biosynthetic process	1.05913e-05
circadian sleep/wake cycle process	8804.04		regulation of mast cell activation	1.05913e-05
circadian sleep/wake cycle	8804.04		negative regulation of cell adhesion	1.08276e-05
circadian behavior	8804.04		glycerophospholipid metabolic process	1.09136e-05
rhythmic behavior	8804.04		regulation of purine nucleotide metabolic process	1.10695e-05
lung development	8797.91		negative regulation of macrophage derived foam cell differentiation	1.12219e-05
respiratory tube development	8797.91		eyelid development in camera-type eye	1.12219e-05
G protein-coupled adenosine receptor signaling pathway	8797.88		cellular response to interleukin-2	1.12219e-05
G protein-coupled purinergic receptor signaling pathway	8797.88		positive regulation of cell cycle process	1.124e-05
regulation of fatty acid metabolic process	8783.94		cellular glucose homeostasis	1.13002e-05
cellular response to hypoxia	8783.7		regulation of striated muscle tissue development	1.13002e-05
cellular response to decreased oxygen levels	8783.7		regulation of organic acid transport	1.17103e-05
positive regulation of cardiac muscle cell proliferation	8780.07		cellular extravasation	1.17103e-05
positive regulation of cardiac muscle tissue growth	8780.07		positive regulation of tissue remodeling	1.21042e-05
positive regulation of heart growth	8780.07		synaptic transmission, dopaminergic	1.26273e-05
positive regulation of cardiac muscle tissue development	8780.07		negative regulation of amine transport	1.26273e-05
positive regulation of organ growth	8780.07		regulation of nucleotide metabolic process	1.26417e-05
signal transduction in response to DNA damage	8778.76		regulation of nitric oxide biosynthetic process	1.29278e-05
response to heat	8776.08		nucleotide biosynthetic process	1.33119e-05
regulation of vascular associated smooth muscle cell proliferation	8762.23		regulation of muscle tissue development	1.33968e-05
vascular associated smooth muscle cell proliferation	8762.23		regulation of leukocyte chemotaxis	1.34967e-05
negative regulation of blood pressure	8747.4		regulation of DNA binding	1.34967e-05
regulation of leukocyte differentiation	8739.37		negative regulation of cell-cell adhesion	1.36751e-05
regulation of transporter activity	8704.02		regulation of systemic arterial blood pressure	1.38748e-05
cellular response to heat	8691.35		regulation of phospholipid metabolic process	1.38748e-05
negative regulation of MAPK cascade	8683.84		regulation of muscle organ development	1.41663e-05
liver development	8648.41		endocrine system development	1.44005e-05
hepaticobiliary system development	8648.41		regulation of ATP metabolic process	1.44005e-05
regulation of wound healing	8621.18		positive regulation of leukocyte chemotaxis	1.49882e-05
regulation of response to wounding	8621.18		nucleoside phosphate biosynthetic process	1.49937e-05
microglial cell activation	8616.47		positive regulation of G protein-coupled receptor signaling pathway	1.52292e-05
leukocyte activation involved in inflammatory response	8616.47		negative regulation of muscle contraction	1.52292e-05
response to osmotic stress	8609.57		acetylcholine receptor signaling pathway	1.52292e-05
response to zinc ion	8594.76		phosphatidylinositol-3-phosphate biosynthetic process	1.55692e-05
glycosyl compound metabolic process	8578.29		detection of mechanical stimulus involved in sensory perception of pain	1.55692e-05
regulation of endothelial cell migration	8543.55		response to interleukin-2	1.55692e-05
nitric oxide biosynthetic process	8506.11		glycerolipid biosynthetic process	1.55944e-05
nitric oxide metabolic process	8506.11		collagen catabolic process	1.56543e-05
reactive nitrogen species metabolic process	8506.11		positive regulation of muscle contraction	1.56543e-05
erythrocyte differentiation	8495.01		response to antibiotic	1.56543e-05
type I interferon signaling pathway	8492.73		negative regulation of immune response	1.58201e-05
cellular response to type I interferon	8492.73		monovalent inorganic cation homeostasis	1.58201e-05
response to type I interferon	8492.73		regulation of alpha-beta T cell activation	1.61757e-05
receptor biosynthetic process	8462.32		positive regulation of Ras protein signal transduction	1.72249e-05
positive regulation of lipid localization	8458.75		mammary gland epithelium development	1.72249e-05
regulation of GTPase activity	8456.09		DNA biosynthetic process	1.74167e-05
regulation of gliogenesis	8436.76		negative regulation of intrinsic apoptotic signaling pathway	1.74414e-05
negative regulation of response to endoplasmic reticulum stress	8434.48		neutral lipid catabolic process	1.77202e-05
regulation of cyclase activity	8413.58		acylglycerol catabolic process	1.77202e-05
regulation of long-term synaptic potentiation	8408.43		synaptic transmission, GABAergic	1.77202e-05
regulation of intrinsic apoptotic signaling pathway	8401.16		regulation of telomerase activity	1.77202e-05
cardiac muscle cell development	8386.32		face development	1.77202e-05
cardiac cell development	8386.32		regulation of myeloid cell apoptotic process	1.82304e-05
striated muscle cell development	8386.32		dendritic cell migration	1.82304e-05
muscle cell development	8386.32		response to glucose	1.82631e-05
platelet-derived growth factor receptor signaling pathway	8381.99		regulation of angiogenesis	1.83759e-05
positive regulation of mitochondrial depolarization	8369.9		regulation of generation of precursor metabolites and energy	1.86116e-05
positive regulation of membrane depolarization	8369.9		positive regulation of vasculature development	1.86169e-05
positive regulation of ATP metabolic process	8368.44		lipid phosphorylation	1.88954e-05
positive regulation of peptide hormone secretion	8358.48		catecholamine transport	1.88954e-05
lymphocyte differentiation	8333.05		lipid homeostasis	1.96315e-05
regulation of 84.7329ptive immune response	8325.08		regulation of collagen metabolic process	2.00005e-05
negative regulation of insulin secretion	8315.85		circadian behavior	2.00005e-05
negative regulation of peptide hormone secretion	8315.85		regulation of stress-activated MAPK cascade	2.02497e-05
fatty acid oxidation	8298.02		regulation of cardiac muscle hypertrophy	2.06974e-05
organic cation transport	8282.54		lymphocyte apoptotic process	2.06974e-05
protein deubiquitination	8261.88		receptor signaling pathway via JAK-STAT	2.06992e-05
protein modification by small protein removal	8261.88		positive regulation of DNA metabolic process	2.10198e-05
production of molecular mediator of immune response	8251.54		regulation of glutamate secretion	2.10396e-05
icosanoid biosynthetic process	8225.74		inflammatory response to wounding	2.10396e-05
unsaturated fatty acid biosynthetic process	8221.5		synaptic transmission, cholinergic	2.16728e-05
positive regulation of fibroblast proliferation	8220.89		regulation of homotypic cell-cell adhesion	2.16728e-05
organic acid catabolic process	8220.85		regulation of cellular respiration	2.16728e-05
carboxylic acid catabolic process	8220.85		response to pain	2.16728e-05
nucleoside triphosphate metabolic process	8185.73		regulation of calcium ion transport into cytosol	2.17485e-05
positive regulation of cold-induced thermogenesis	8181.04		cholesterol homeostasis	2.17485e-05
detection of abiotic stimulus	8180.4		positive regulation of peptidase activity	2.20155e-05
one-carbon metabolic process	8165.76		rhythmic behavior	2.25114e-05
positive regulation of phospholipase activity	8150.33		positive regulation of nucleotide metabolic process	2.25114e-05
regulation of phospholipase activity	8150.33		regulation of bone remodeling	2.25114e-05
glycerolipid biosynthetic process	8124.31		positive regulation of purine nucleotide metabolic process	2.25114e-05
regulation of steroid biosynthetic process	8116.35		positive regulation of phospholipid metabolic process	2.25114e-05
regulation of pri-miRNA transcription by RNA polymerase II	8100.55		positive regulation of vascular associated smooth muscle cell proliferation	2.25114e-05
pri-miRNA transcription by RNA polymerase II	8100.55		regulation of mitochondrial membrane potential	2.26388e-05
purine nucleotide biosynthetic process	8085.58		regulation of stress-activated protein kinase signaling cascade	2.29329e-05
purine-containing compound biosynthetic process	8085.58		regulation of intrinsic apoptotic signaling pathway	2.29847e-05
energy derivation by oxidation of organic compounds	8067.22		sterol homeostasis	2.33689e-05
positive regulation of ubiquitin-dependent protein catabolic process	8057.85		lysosome localization	2.47279e-05
positive regulation of proteolysis involved in cellular protein catabolic process	8057.85		cellular response to glucose stimulus	2.51319e-05
regulation of ubiquitin-dependent protein catabolic process	8057.85		positive regulation of hemopoiesis	2.52513e-05
regulation of cholesterol transport	8049.21		cellular response to interleukin-6	2.52701e-05
cholesterol transport	8049.21		response to isoquinoline alkaloid	2.56e-05
bone resorption	8037.43		response to morphine	2.56e-05
bone remodeling	8037.43		positive regulation of smooth muscle contraction	2.56e-05
skeletal system morphogenesis	7992.45		axon guidance	2.65201e-05
negative regulation of extrinsic apoptotic signaling pathway	7954.12		cardiac muscle hypertrophy	2.69145e-05
detection of stimulus involved in sensory perception of pain	7951.81		regulation of muscle hypertrophy	2.69733e-05
detection of external stimulus	7951.81		multicellular organismal response to stress	2.69733e-05
muscle 84.7329ptation	7945.79		neuron projection guidance	2.75095e-05
digestion	7945.71		regulation of cell cycle G1/S phase transition	2.76301e-05
gonad development	7931.61		membrane disassembly	2.78003e-05
development of primary sexual characteristics	7931.61		regulation of synaptic transmission, dopaminergic	2.78003e-05
sensory perception of temperature stimulus	7915.58		detection of temperature stimulus involved in sensory perception of pain	2.78003e-05
immune response-activating cell surface receptor signaling pathway	7887.97		nuclear envelope disassembly	2.78003e-05
immune response-activating signal transduction	7887.97		positive regulation of nitric-oxide synthase biosynthetic process	2.78003e-05
potassium ion transport	7882.32		cellular response to hexose stimulus	2.82702e-05
regulation of muscle cell apoptotic process	7879.96		regulation of granulocyte chemotaxis	2.82943e-05
muscle cell apoptotic process	7879.96		regulation of peptidase activity	2.95559e-05
regulation of tumor necrosis factor production	7876.7		cellular response to monosaccharide stimulus	2.996e-05
regulation of tumor necrosis factor superfamily cytokine production	7876.7		estrogen metabolic process	3.00582e-05
vascular endothelial growth factor receptor signaling pathway	7876.3		regulation of macrophage derived foam cell differentiation	3.00582e-05
response to organophosphorus	7874.65		arachidonic acid secretion	3.00582e-05
cellular monovalent inorganic cation homeostasis	7861.36		arachidonate transport	3.00582e-05
growth hormone receptor signaling pathway	7849.45		negative regulation of protein binding	3.08999e-05
cellular response to growth hormone stimulus	7849.45		regulation of cell cycle arrest	3.08999e-05
response to growth hormone	7849.45		collagen biosynthetic process	3.16026e-05
positive regulation of leukocyte proliferation	7848.55		positive regulation of leukocyte mediated immunity	3.17347e-05
regulation of nitric oxide biosynthetic process	7846.75		positive regulation of small GTPase mediated signal transduction	3.19691e-05
response to UV	7838.66		regulation of endocytosis	3.2974e-05
regulation of cellular response to oxidative stress	7834.56		striated muscle hypertrophy	3.30708e-05
regulation of response to oxidative stress	7834.56		regulation of protein dephosphorylation	3.35977e-05
regulation of tissue remodeling	7831.83		receptor signaling pathway via STAT	3.44264e-05
cellular response to interleukin-6	7773.88		retinoid metabolic process	3.53676e-05
response to interleukin-6	7773.88		response to UV	3.55525e-05
cellular response to nutrient	7770.63		negative regulation of smooth muscle contraction	3.60271e-05
epidermis development	7753.83		ventricular cardiac muscle cell differentiation	3.60271e-05
cell cycle arrest	7751.03		positive regulation of telomere capping	3.60271e-05
positive regulation of protein-containing complex assembly	7743.68		response to axon injury	3.77017e-05
positive regulation of amine transport	7732.13		muscle hypertrophy	3.77963e-05
carbohydrate biosynthetic process	7728.24		positive regulation of epithelial cell migration	3.79495e-05
regulation of myeloid cell differentiation	7727.41		T cell differentiation	3.84645e-05
positive regulation of peptidase activity	7721.73		response to interleukin-6	3.91507e-05
regulation of leukocyte chemotaxis	7720.09		glucose metabolic process	3.91872e-05
cartilage development	7713.68		striated muscle cell differentiation	3.93233e-05
mammary gland epithelium development	7705.5		negative regulation of growth	3.99689e-05
mammary gland development	7705.5		positive regulation of adaptive immune response	4.03628e-05
positive regulation of leukocyte chemotaxis	7699.39		triglyceride metabolic process	4.03628e-05
regulation of pH	7691.89		positive regulation of cell cycle phase transition	4.03628e-05
response to iron ion	7686.08		monosaccharide metabolic process	4.0718e-05
biomineral tissue development	7685.9		negative regulation of transferase activity	4.0718e-05
biomineralization	7685.9		positive regulation of cytokine secretion	4.07641e-05
negative regulation of amine transport	7684.54		positive regulation of cytosolic calcium ion concentration involved in phospholipase C-activating G protein-coupled signaling pathway	4.07641e-05
cell death in response to oxidative stress	7666.78		interleukin-6-mediated signaling pathway	4.07641e-05
production of molecular mediator involved in inflammatory response	7647.88		regulation of T cell apoptotic process	4.07641e-05
mast cell activation	7647.31		telomere maintenance via telomere lengthening	4.08695e-05
cytokine production involved in inflammatory response	7627.18		T cell costimulation	4.34317e-05
regulation of 84.7329ptive immune response based on somatic recombination of immune receptors built from immunoglobulin superfamily domains	7622.97		extracellular matrix disassembly	4.42525e-05
primary alcohol metabolic process	7571.47		axonogenesis	4.50736e-05
negative regulation of epithelial cell proliferation	7566.83		striatum development	4.5904e-05
insulin receptor signaling pathway	7551.51		detection of temperature stimulus involved in sensory perception	4.5904e-05
digestive tract development	7532.85		learning	4.68346e-05
digestive system development	7532.85		striated muscle tissue development	4.70181e-05
telomere maintenance	7531.82		negative regulation of phosphorylation	4.74492e-05
telomere organization	7531.82		interleukin-12 production	4.80796e-05
liver regeneration	7529.32		cellular response to fatty acid	4.80796e-05
long-chain fatty acid transport	7526.07		regulation of lymphocyte differentiation	4.8133e-05
positive regulation of lipid transport	7519.89		Ras protein signal transduction	5.03759e-05
interleukin-12-mediated signaling pathway	7513.24		vesicle-mediated transport in synapse	5.03902e-05
cellular response to interleukin-12	7513.24		cellular response to interferon-gamma	5.04273e-05
response to interleukin-12	7513.24		endocrine process	5.17088e-05
granulocyte migration	7477.17		regulation of autophagy	5.19675e-05
regulation of interleukin-6 production	7467.85		entry into host	5.21254e-05
response to glucocorticoid	7459.64		response to calcium ion	5.21254e-05
negative regulation of DNA binding	7458.51		lymphocyte costimulation	5.31174e-05
regulation of mast cell activation	7457.15		response to fluid shear stress	5.42061e-05
telomere maintenance via telomere lengthening	7447.09		positive regulation of telomerase activity	5.42061e-05
regulation of bone resorption	7445.13		regulation of nervous system process	5.49545e-05
regulation of bone remodeling	7445.13		cell growth	5.52549e-05
triglyceride metabolic process	7425.05		response to osmotic stress	5.58054e-05
regulation of potassium ion transport	7424.73		positive regulation of bone resorption	5.76223e-05
regulation of cellular pH	7403.77		positive regulation of bone remodeling	5.76223e-05
vasodilation	7401.63		mammary gland alveolus development	5.76223e-05
negative regulation of organ growth	7382.88		mammary gland lobule development	5.76223e-05
negative regulation of developmental growth	7382.88		oxidative demethylation	5.76223e-05
regulation of DNA biosynthetic process	7356.61		regulation of G1/S transition of mitotic cell cycle	5.78782e-05
positive regulation of phospholipase C activity	7348.89		response to purine-containing compound	5.7912e-05
regulation of phospholipase C activity	7348.89		regulation of macrophage activation	5.85685e-05
axon guidance	7347.99		regulation of cytokine secretion	5.85685e-05
neuron projection guidance	7347.99		negative regulation of protein phosphorylation	5.88584e-05
dopamine receptor signaling pathway	7343.44		regulation of vasculature development	5.88584e-05
vasoconstriction	7342.86		protein import into nucleus	6.10026e-05
establishment of protein localization to mitochondrion	7332.1		positive regulation of lipid kinase activity	6.2093e-05
protein localization to mitochondrion	7332.1		epithelial cell apoptotic process	6.2724e-05
positive regulation of nitric-oxide synthase biosynthetic process	7308.14		ephrin receptor signaling pathway	6.47969e-05
nitric-oxide synthase biosynthetic process	7308.14		regulation of cellular ketone metabolic process	6.9256e-05
regulation of nitric-oxide synthase biosynthetic process	7308.14		phosphatidylcholine metabolic process	6.97174e-05
B cell activation	7296.94		regulation of vascular endothelial growth factor production	7.081e-05
regulation of reproductive process	7295.73		tetrapyrrole metabolic process	7.081e-05
regulation of lymphocyte proliferation	7286.56		macrophage derived foam cell differentiation	7.08363e-05
regulation of mononuclear cell proliferation	7286.56		triglyceride catabolic process	7.08363e-05
granulocyte chemotaxis	7284.83		response to food	7.08363e-05
cellular defense response	7274.19		regulation of sensory perception of pain	7.08363e-05
glucose transmembrane transport	7270.99		positive regulation of amine transport	7.08363e-05
hexose transmembrane transport	7270.99		positive regulation of cardiac muscle cell proliferation	7.08363e-05
monosaccharide transmembrane transport	7270.99		foam cell differentiation	7.08363e-05
carbohydrate transmembrane transport	7270.99		negative regulation of blood circulation	7.08363e-05
carbohydrate transport	7270.99		regulation of adaptive immune response based on somatic recombination of immune receptors built from immunoglobulin superfamily domains	7.1121e-05
positive regulation of leukocyte mediated immunity	7270.12		nitric-oxide synthase biosynthetic process	7.13805e-05
regulation of phosphoprotein phosphatase activity	7265.53		regulation of nitric-oxide synthase biosynthetic process	7.13805e-05
regulation of phosphatase activity	7265.53		glycerophospholipid biosynthetic process	7.51951e-05
regulation of histone modification	7240.02		lymphocyte homeostasis	7.76519e-05
regulation of chromatin organization	7240.02		memory	7.95775e-05
gland morphogenesis	7227.75		positive regulation of receptor signaling pathway via JAK-STAT	8.04752e-05
regulation of cholesterol metabolic process	7227.74		regulation of sensory perception	8.04982e-05
response to amphetamine	7213.84		response to growth hormone	8.04982e-05
response to pain	7211.72		muscle tissue development	8.26225e-05
response to estradiol	7193.79		positive regulation of growth	8.2817e-05
regulation of lipid catabolic process	7175.35		mitotic G1 DNA damage checkpoint	8.50104e-05
regulation of ion transmembrane transporter activity	7158.82		positive regulation of alpha-beta T cell activation	8.50104e-05
regulation of transmembrane transporter activity	7158.82		bone remodeling	8.63406e-05
protein localization to chromosome	7157.72		cellular response to alcohol	8.63406e-05
interleukin-6-mediated signaling pathway	7156.51		leukotriene biosynthetic process	8.73837e-05
sensory perception of mechanical stimulus	7122.26		peroxisome proliferator activated receptor signaling pathway	8.73837e-05
response to cocaine	7122.09		regulation of platelet aggregation	8.73837e-05
regulation of protein localization to membrane	7110.48		positive regulation of cardiac muscle hypertrophy	9.1143e-05
sodium ion homeostasis	7098.96		positive regulation of DNA replication	9.1143e-05
male gonad development	7093.74		lipid export from cell	9.1143e-05
development of primary male sexual characteristics	7093.74		regulation of cellular response to oxidative stress	9.25498e-05
male sex differentiation	7093.74		regulation of response to endoplasmic reticulum stress	9.25498e-05
cell killing	7087.95		columnar/cuboidal epithelial cell development	9.29136e-05
regulation of mononuclear cell migration	7082.01		G1 DNA damage checkpoint	9.29136e-05
mononuclear cell migration	7082.01		mitotic G1/S transition checkpoint	9.29136e-05
positive regulation of GTPase activity	7068.82		positive regulation of leukocyte differentiation	9.56335e-05
leukocyte mediated cytotoxicity	7067.25		positive regulation of receptor signaling pathway via STAT	9.91179e-05
digestive system process	7067.22		cellular response to heat	0.000100028
regulation of renal system process	7037.66		muscle adaptation	0.000100028
morphogenesis of a branching epithelium	7025.76		vascular endothelial growth factor production	0.00010139
regulation of lymphocyte apoptotic process	7025.63		killing of cells of other organism	0.00010139
lymphocyte apoptotic process	7025.63		sex differentiation	0.000101672
response to acetylcholine	7014.76		mating	0.000102837
cellular response to acetylcholine	7014.76		positive regulation of muscle hypertrophy	0.000102837
regulation of urine volume	7012.47		response to testosterone	0.000102837
response to retinoic acid	6995.3		adaptive immune response based on somatic recombination of immune receptors built from immunoglobulin superfamily domains	0.00010294
regulation of receptor biosynthetic process	6970.61		telomere maintenance	0.000105234
positive regulation of fatty acid metabolic process	6965.08		DNA integrity checkpoint	0.000105234
regulation of cell cycle arrest	6962.24		cardiac muscle cell differentiation	0.000105768
positive regulation of synaptic transmission, glutamatergic	6947.62		calcium-mediated signaling using intracellular calcium source	0.000105843
negative regulation of blood circulation	6944.26		response to hyperoxia	0.000105843
mitotic DNA integrity checkpoint	6941.54		negative regulation of cell cycle arrest	0.000105843
negative regulation of G1/S transition of mitotic cell cycle	6941.54		cellular response to prostaglandin stimulus	0.000105843
negative regulation of cell cycle G1/S phase transition	6941.54		positive regulation of mitotic cell cycle phase transition	0.00010606
mitotic cell cycle checkpoint	6941.54		positive regulation of lipid localization	0.00010606
mesenchyme development	6924.2		synaptic vesicle cycle	0.000106311
DNA replication	6923.34		histone modification	0.000108763
positive regulation of fat cell differentiation	6909.69		regulation of extrinsic apoptotic signaling pathway	0.00011033
mitotic G1 DNA damage checkpoint	6905.31		circadian regulation of gene expression	0.000110471
G1 DNA damage checkpoint	6905.31		protein import	0.0001108
mitotic G1/S transition checkpoint	6905.31		body fluid secretion	0.000113393
mitotic DNA damage checkpoint	6905.31		morphogenesis of a branching structure	0.000115448
multicellular organism growth	6901.03		biomineral tissue development	0.00011563
humoral immune response	6897.47		biomineralization	0.00011563
Fc-epsilon receptor signaling pathway	6890.39		cellular response to osmotic stress	0.00011565
DNA damage response, signal transduction by p53 class mediator	6889.77		regulation of purine nucleotide biosynthetic process	0.00011565
regulation of JNK cascade	6882.97		regulation of gliogenesis	0.000118069
DNA damage response, signal transduction by p53 class mediator resulting in cell cycle arrest	6869.07		negative regulation of transmembrane transport	0.000118069
signal transduction involved in mitotic G1 DNA damage checkpoint	6869.07		potassium ion transport	0.000118148
intracellular signal transduction involved in G1 DNA damage checkpoint	6869.07		purine-containing compound metabolic process	0.000119961
signal transduction involved in mitotic cell cycle checkpoint	6869.07		regulation of lipid kinase activity	0.000120185
signal transduction involved in mitotic DNA damage checkpoint	6869.07		response to interferon-gamma	0.000120261
signal transduction involved in mitotic DNA integrity checkpoint	6869.07		response to corticosteroid	0.000121143
signal transduction involved in DNA integrity checkpoint	6869.07		endothelial cell migration	0.000124108
signal transduction involved in DNA damage checkpoint	6869.07		erythrocyte homeostasis	0.000124649
signal transduction involved in cell cycle checkpoint	6869.07		epithelial tube morphogenesis	0.000126009
positive regulation of cell cycle arrest	6869.07		detection of temperature stimulus	0.000126975
positive regulation of lymphocyte activation	6868.06		positive regulation of leukocyte adhesion to vascular endothelial cell	0.000126975
regulation of alpha-beta T cell activation	6858.79		CD4-positive, alpha-beta T cell activation	0.000129297
synaptic transmission, dopaminergic	6850.95		cell death in response to oxidative stress	0.000129297
regulation of protein ubiquitination	6838.61		mononuclear cell migration	0.000129297
regulation of protein modification by small protein conjugation or removal	6838.61		positive regulation of cold-induced thermogenesis	0.000129297
regulation of T cell proliferation	6833.1		regulation of nucleotide biosynthetic process	0.000129652
negative regulation of cell growth	6831.5		regulation of neuroinflammatory response	0.000129652
acetylcholine receptor signaling pathway	6822.41		positive regulation of stem cell proliferation	0.000129652
positive regulation of cyclase activity	6728.97		response to heat	0.000132828
regulation of renal sodium excretion	6726.1		negative regulation of protein kinase activity	0.000136477
renal sodium excretion	6726.1		regulation of steroid metabolic process	0.000138718
regulation of excretion	6726.1		positive regulation of hormone secretion	0.000138718
regulation of muscle contraction	6699.55		telomere maintenance via telomerase	0.000141642
phosphatidylcholine metabolic process	6686		regulation of antigen receptor-mediated signaling pathway	0.000141642
response to epidermal growth factor	6685.44		positive regulation of DNA biosynthetic process	0.000141642
positive regulation of proteasomal ubiquitin-dependent protein catabolic process	6670.58		positive regulation of protein dephosphorylation	0.000144917
positive regulation of proteasomal protein catabolic process	6670.58		adipose tissue development	0.000144917
regulation of proteasomal ubiquitin-dependent protein catabolic process	6670.58		positive regulation of endothelial cell migration	0.000146229
response to antibiotic	6663.6		positive regulation of peptide hormone secretion	0.000146964
regulation of telomerase activity	6652.56		ameboidal-type cell migration	0.000148911
actin filament organization	6642.83		covalent chromatin modification	0.000148911
purine nucleoside triphosphate metabolic process	6642.79		dendritic cell chemotaxis	0.000151003
negative regulation of heart contraction	6632.7		subpallium development	0.000151003
response to calcium ion	6627.68		negative regulation of chondrocyte differentiation	0.000151003
cholesterol biosynthetic process	6626.36		negative regulation of lipid catabolic process	0.000151003
secondary alcohol biosynthetic process	6626.36		movement in host environment	0.000152115
sterol biosynthetic process	6626.36		positive regulation of lipid transport	0.000153451
response to carbohydrate	6623.58		regulation of endopeptidase activity	0.000158727
regulation of norepinephrine secretion	6612.88		interleukin-6 production	0.000159041
norepinephrine secretion	6612.88		positive regulation of glucose transmembrane transport	0.000161518
norepinephrine transport	6612.88		glutamate secretion	0.000161518
regulation of telomere maintenance via telomere lengthening	6599.86		positive regulation of chemokine production	0.000161518
regulation of telomere maintenance	6599.86		positive regulation of nitric oxide biosynthetic process	0.000161518
telencephalon cell migration	6595.94		viral entry into host cell	0.000162259
regulation of macrophage migration	6562.02		regulation of sterol transport	0.000166026
macrophage migration	6562.02		import into nucleus	0.000166228
positive regulation of mitochondrion organization	6561.31		interleukin-8 production	0.000166538
purine ribonucleoside triphosphate metabolic process	6558.06		positive regulation of T cell proliferation	0.000166538
ribonucleoside triphosphate metabolic process	6558.06		regulation of response to oxidative stress	0.000166538
detection of temperature stimulus involved in sensory perception of pain	6542.04		fever generation	0.000169678
detection of temperature stimulus involved in sensory perception	6542.04		sphingosine-1-phosphate receptor signaling pathway	0.000169678
detection of temperature stimulus	6542.04		relaxation of smooth muscle	0.000169678
response to hexose	6538.84		negative regulation of synaptic transmission, glutamatergic	0.000169678
response to monosaccharide	6538.84		neutrophil mediated cytotoxicity	0.000169678
response to glucose	6538.84		heart process	0.000176381
positive regulation of interleukin-6 production	6528.99		cellular response to tumor necrosis factor	0.000176381
response to fluid shear stress	6525.19		regulation of cyclin-dependent protein serine/threonine kinase activity	0.000177087
regulation of ERBB signaling pathway	6523.4		regulation of muscle adaptation	0.000177087
regulation of smooth muscle contraction	6509.39		positive regulation of antigen receptor-mediated signaling pathway	0.000178153
regulation of actin filament-based process	6508.56		muscle cell differentiation	0.000178166
positive regulation of T cell activation	6499.32		interaction with host	0.000178464
retinoid metabolic process	6497.03		positive regulation of fat cell differentiation	0.000179401
cellular response to vascular endothelial growth factor stimulus	6492.19		positive regulation of nitric oxide metabolic process	0.000179534
positive regulation of nucleotide metabolic process	6489.04		sensory perception of mechanical stimulus	0.000181417
positive regulation of purine nucleotide metabolic process	6489.04		negative regulation of leukocyte cell-cell adhesion	0.000188996
adult behavior	6478.72		telomere organization	0.000189435
negative regulation of leukocyte apoptotic process	6473.7		positive regulation of binding	0.000189435
receptor-mediated endocytosis	6472.78		dephosphorylation	0.000192435
growth hormone receptor signaling pathway via JAK-STAT	6462.17		purine nucleotide metabolic process	0.000193442
branching morphogenesis of an epithelial tube	6460.53		visual learning	0.000199044
regulation of Ras protein signal transduction	6456.15		interleukin-12-mediated signaling pathway	0.000199044
cellular respiration	6413.67		genitalia development	0.000199044
positive regulation of sprouting angiogenesis	6406.23		response to epidermal growth factor	0.000199044
regulation of production of molecular mediator of immune response	6383.75		regulation of epithelial cell migration	0.00019957
G protein-coupled acetylcholine receptor signaling pathway	6381.55		positive regulation of protein-containing complex assembly	0.000199827
interleukin-12 production	6376.93		positive regulation of collagen biosynthetic process	0.000208656
response to transforming growth factor beta	6372.05		prostate gland epithelium morphogenesis	0.000208656
positive regulation of ossification	6371.67		regulation of telomere capping	0.000208656
positive regulation of protein binding	6367.18		superoxide metabolic process	0.0002087
regulation of granulocyte chemotaxis	6357.26		positive regulation of adaptive immune response based on somatic recombination of immune receptors built from immunoglobulin superfamily domains	0.000212019
osteoclast differentiation	6344.95		feeding behavior	0.000212019
regulation of interleukin-1 production	6344.72		Rho protein signal transduction	0.000219252
interleukin-1 production	6344.72		positive regulation of cardiac muscle tissue growth	0.000220128
cellular response to mechanical stimulus	6341.6		regulation of long-term synaptic potentiation	0.000220128
regulation of glucose transmembrane transport	6332.13		cellular response to vascular endothelial growth factor stimulus	0.000224697
positive regulation of carbohydrate metabolic process	6322.75		regulation of glial cell differentiation	0.000224697
cell aging	6322.1		fatty acid oxidation	0.000224825
regulation of epidermal growth factor receptor signaling pathway	6319.22		alpha-beta T cell differentiation	0.000224825
regulation of G protein-coupled receptor signaling pathway	6314		regulation of cyclin-dependent protein kinase activity	0.000224825
cytokine production involved in immune response	6312.72		male gonad development	0.000230178
regulation of cell 86.68ction assembly	6308.77		positive regulation of guanylate cyclase activity	0.00023133
positive regulation of NF-kappaB transcription factor activity	6305.42		response to vitamin E	0.00023133
embryonic organ morphogenesis	6297.83		Leydig cell differentiation	0.00023133
positive regulation of endocytosis	6293.98		interleukin-35-mediated signaling pathway	0.00023133
regulation of interleukin-12 production	6292.2		retrograde trans-synaptic signaling	0.00023133
icosanoid transport	6281.29		regulation of potassium ion transport	0.000238248
fatty acid derivative transport	6281.29		negative regulation of extrinsic apoptotic signaling pathway	0.000238248
peptidyl-tyrosine dephosphorylation	6276.77		development of primary male sexual characteristics	0.000241547
glycerolipid catabolic process	6260.18		RNA-dependent DNA biosynthetic process	0.000241645
regulation of interleukin-1 beta production	6259.99		regulation of stem cell proliferation	0.000241645
interleukin-1 beta production	6259.99		positive regulation of collagen metabolic process	0.000242747
neural precursor cell proliferation	6238.47		positive regulation of G2/M transition of mitotic cell cycle	0.000242747
cellular modified amino acid metabolic process	6235.23		regulation of T cell differentiation in thymus	0.000242747
cellular response to low-density lipoprotein particle stimulus	6229.8		positive regulation of lipid catabolic process	0.000242747
response to lipoprotein particle	6229.8		negative regulation of leukocyte migration	0.000242869
cellular response to lipoprotein particle stimulus	6229.8		regulation of membrane depolarization	0.000242869
regulation of monooxygenase activity	6204.11		prostate gland development	0.000242869
regulation of neural precursor cell proliferation	6202.23		T cell apoptotic process	0.000242869
icosanoid secretion	6194.61		cellular response to interleukin-12	0.000242869
monosaccharide biosynthetic process	6159.42		mitotic DNA integrity checkpoint	0.000252309
regulation of morphogenesis of a branching structure	6146.76		regulation of fat cell differentiation	0.000253371
cellular response to osmotic stress	6124.34		positive regulation of endopeptidase activity	0.000254237
negative regulation of innate immune response	6116.66		negative regulation of ion transmembrane transporter activity	0.000259583
negative regulation of response to biotic stimulus	6116.66		regulation of production of molecular mediator of immune response	0.000265666
G protein-coupled serotonin receptor signaling pathway	6109.39		positive regulation of peptidyl-serine phosphorylation	0.000267031
serotonin receptor signaling pathway	6109.39		regulation of DNA biosynthetic process	0.000267031
genitalia development	6105.77		response to interleukin-12	0.000267354
cellular response to alcohol	6073.63		positive regulation of ATP metabolic process	0.000267354
glycerophospholipid biosynthetic process	6070.88		gonad development	0.000268239
T cell differentiation	6068.51		protein processing	0.000268239
regulation of blood vessel endothelial cell migration	6064.73		negative regulation of wound healing	0.00027855
blood vessel endothelial cell migration	6064.73		positive regulation of neurotransmitter transport	0.000280667
ribose phosphate biosynthetic process	6057.68		prostate gland morphogenesis	0.000280667
regulation of nitric-oxide synthase activity	6045.99		response to angiotensin	0.000280667
bicarbonate transport	6030.52		negative regulation of kinase activity	0.000286525
positive regulation of epithelial cell migration	6022.9		regulation of endothelial cell proliferation	0.000287147
positive regulation of receptor signaling pathway via JAK-STAT	6013.01		negative regulation of response to endoplasmic reticulum stress	0.000293667
positive regulation of receptor signaling pathway via STAT	6013.01		cellular response to mechanical stimulus	0.00029859
import into cell	5992.36		phosphatidylinositol metabolic process	0.000298871
defense response to bacterium	5954.4		response to glucocorticoid	0.000305511
tyrosine phosphorylation of STAT protein	5953.35		negative regulation of mast cell activation	0.000305827
bone mineralization	5940.78		macrophage proliferation	0.000305827
interleukin-27-mediated signaling pathway	5928.91		regulation of thymocyte apoptotic process	0.000305827
ether metabolic process	5928.46		thrombin-activated receptor signaling pathway	0.000305827
regulation of cholesterol efflux	5915.9		sphingolipid mediated signaling pathway	0.000305827
cholesterol efflux	5915.9		regulation of deacetylase activity	0.000305827
positive regulation of DNA replication	5899.75		regulation of lyase activity	0.000321898
regulation of DNA replication	5899.75		sodium ion homeostasis	0.000321898
positive regulation of DNA biosynthetic process	5896.15		positive regulation of heart growth	0.000321898
regulation of calcium ion transmembrane transport	5891.25		B cell homeostasis	0.000322657
memory	5884.25		phosphatidylcholine acyl-chain remodeling	0.000322657
negative regulation of intrinsic apoptotic signaling pathway	5883.13		response to increased oxygen levels	0.000322657
B cell differentiation	5872.56		negative regulation of heart contraction	0.000322657
positive regulation of circadian rhythm	5871.94		positive regulation of leukocyte apoptotic process	0.000322657
telomere maintenance via telomerase	5867.91		regulation of DNA metabolic process	0.000326554
RNA-dependent DNA biosynthetic process	5867.91		development of primary sexual characteristics	0.000331398
ventricular cardiac muscle cell differentiation	5865.04		positive regulation of endothelial cell proliferation	0.000332982
positive regulation of neurotransmitter transport	5847.37		positive regulation of cellular protein catabolic process	0.000334689
response to sterol	5832.69		regulation of T cell differentiation	0.000350108
positive regulation of DNA binding	5815.98		cellular monovalent inorganic cation homeostasis	0.000351355
positive regulation of anion transport	5810.07		response to amino acid	0.000351355
regulation of G2/M transition of mitotic cell cycle	5796.82		cellular detoxification	0.000351355
regulation of cell cycle G2/M phase transition	5796.82		visual behavior	0.000352137
cardiac muscle hypertrophy	5787.91		negative regulation of DNA binding	0.000352137
striated muscle hypertrophy	5787.91		leukocyte adhesion to vascular endothelial cell	0.000352137
muscle hypertrophy	5787.91		DNA damage checkpoint	0.000366101
response to amyloid-beta	5787.62		positive regulation of cysteine-type endopeptidase activity	0.000366101
negative regulation of cysteine-type endopeptidase activity involved in apoptotic process	5783.33		positive regulation of cell cycle G2/M phase transition	0.000368962
negative regulation of cysteine-type endopeptidase activity	5783.33		regulation of cell growth	0.000378205
extrinsic apoptotic signaling pathway via death domain receptors	5779.41		cellular defense response	0.000384476
regulation of extrinsic apoptotic signaling pathway via death domain receptors	5779.41		positive regulation of calcium ion transport into cytosol	0.000384476
morphogenesis of embryonic epithelium	5773.67		cardiac muscle cell development	0.000390319
regulation of phospholipid metabolic process	5769.52		cell cycle arrest	0.0003931
regulation of macrophage chemotaxis	5760.58		negative regulation of acute inflammatory response	0.000394208
macrophage chemotaxis	5760.58		respiratory burst involved in defense response	0.000394208
NIK/NF-kappaB signaling	5756.71		positive regulation of granulocyte macrophage colony-stimulating factor production	0.000394208
negative regulation of epithelial cell apoptotic process	5755.8		negative regulation of action potential	0.000394208
cellular response to alkaloid	5750.47		behavioral response to pain	0.000394208
response to ionizing radiation	5749.47		positive regulation of endoplasmic reticulum unfolded protein response	0.000394208
negative regulation of leukocyte mediated immunity	5745.21		fat cell differentiation	0.000406522
positive regulation of macrophage chemotaxis	5739.89		anatomical structure maturation	0.000406522
positive regulation of macrophage migration	5739.89		bone mineralization	0.000411399
regulation of NIK/NF-kappaB signaling	5736.02		regulation of phosphoprotein phosphatase activity	0.000411399
positive regulation of organic acid transport	5725.34		positive regulation of carbohydrate metabolic process	0.000416366
positive regulation of synaptic transmission, GABAergic	5712.08		regulation of interleukin-12 production	0.000419009
positive regulation of glutamate secretion	5704.64		positive regulation of acute inflammatory response	0.000419831
positive regulation of amino acid transport	5704.64		positive regulation of monooxygenase activity	0.000419831
astrocyte activation	5703.95		detection of mechanical stimulus involved in sensory perception	0.000419831
astrocyte development	5703.95		negative regulation of cartilage development	0.000419831
regulation of cardiac muscle hypertrophy	5703.18		negative regulation of T cell activation	0.000433141
regulation of muscle hypertrophy	5703.18		regulation of B cell activation	0.000439484
regulation of muscle 84.7329ptation	5703.18		negative regulation of autophagy	0.00044375
positive regulation of NIK/NF-kappaB signaling	5699.78		positive regulation of striated muscle tissue development	0.00044375
positive regulation of hemopoiesis	5696.82		positive regulation of muscle organ development	0.00044375
positive regulation of endothelial cell migration	5695.81		regulation of endothelial cell migration	0.000449098
positive regulation of histone modification	5683.03		DNA damage response, signal transduction by p53 class mediator resulting in cell cycle arrest	0.00045583
positive regulation of chromatin organization	5683.03		positive regulation of muscle tissue development	0.000472519
cell-matrix adhesion	5682.43		purine nucleotide biosynthetic process	0.000473277
tetrapyrrole metabolic process	5679.31		response to prostaglandin	0.000475513
embryonic placenta development	5676.32		regulation of mast cell degranulation	0.000475513
regulation of macrophage activation	5673.53		regulation of fatty acid oxidation	0.000475513
antigen receptor-mediated signaling pathway	5669.91		positive regulation of synaptic transmission, glutamatergic	0.000475513
regulation of vasoconstriction	5665.66		cellular response to vitamin	0.000475513
face development	5664.82		cellular response to interleukin-4	0.000475513
cellular response to carbohydrate stimulus	5664.02		secondary metabolic process	0.000495037
intracellular estrogen receptor signaling pathway	5660.92		phosphatidylinositol phosphorylation	0.000495037
regulation of protein tyrosine kinase activity	5658.78		signal transduction involved in mitotic G1 DNA damage checkpoint	0.000495037
regulation of cell-matrix adhesion	5657.35		intracellular signal transduction involved in G1 DNA damage checkpoint	0.000495037
ovulation cycle	5643.29		I-kappaB kinase/NF-kappaB signaling	0.000496123
regulation of signaling receptor activity	5639.27		cellular potassium ion homeostasis	0.000497474
regulation of glial cell differentiation	5627.64		regulation of guanylate cyclase activity	0.000497474
behavioral response to pain	5609.6		prostaglandin secretion	0.000497474
positive regulation of pri-miRNA transcription by RNA polymerase II	5608.92		negative regulation of catecholamine secretion	0.000497474
chondrocyte differentiation	5596.11		platelet-derived growth factor receptor-beta signaling pathway	0.000497474
positive regulation of Ras protein signal transduction	5593.2		positive regulation of fatty acid oxidation	0.000497474
positive regulation of small GTPase mediated signal transduction	5593.2		monoacylglycerol metabolic process	0.000497474
lymphocyte mediated immunity	5582.52		regulation of killing of cells of other organism	0.000497474
negative regulation of transmembrane transport	5579.65		growth hormone receptor signaling pathway via JAK-STAT	0.000497474
cellular glucose homeostasis	5579.29		regulation of adenylate cyclase-activating G protein-coupled receptor signaling pathway	0.000497474
cellular response to glucose stimulus	5579.29		long-term synaptic potentiation	0.000502721
cellular response to hexose stimulus	5579.29		columnar/cuboidal epithelial cell differentiation	0.000503927
cellular response to monosaccharide stimulus	5579.29		erythrocyte differentiation	0.000503927
leukocyte homeostasis	5574.76		endothelial cell proliferation	0.000509178
regulation of calcium ion transport into cytosol	5573.47		heart contraction	0.000510785
nucleoside triphosphate biosynthetic process	5569.47		cellular response to toxic substance	0.000529467
neuron projection organization	5566.23		negative regulation of transporter activity	0.000534404
T cell receptor signaling pathway	5564.48		positive regulation of interleukin-6 production	0.000534404
retinol metabolic process	5558.17		positive regulation of lipid biosynthetic process	0.000534404
anaphase-promoting complex-dependent catabolic process	5552.94		chemokine-mediated signaling pathway	0.000534404
cellular detoxification	5550.71		regulation of cellular extravasation	0.00053626
cellular response to toxic substance	5550.71		regulation of mast cell activation involved in immune response	0.00053626
detoxification	5550.71		positive regulation of Rho protein signal transduction	0.00053626
regulation of cytokine production involved in inflammatory response	5538.25		embryo implantation	0.000536727
response to isoquinoline alkaloid	5523.96		positive regulation of dephosphorylation	0.000536727
response to morphine	5523.96		regulation of myeloid leukocyte differentiation	0.000556028
positive regulation of nitric oxide biosynthetic process	5521.09		tyrosine phosphorylation of STAT protein	0.000567619
positive regulation of nitric oxide metabolic process	5521.09		cardiac cell development	0.000567619
positive regulation of reactive oxygen species biosynthetic process	5521.09		regulation of transporter activity	0.000573113
regulation of biomineral tissue development	5515.75		lipopolysaccharide-mediated signaling pathway	0.000581001
regulation of biomineralization	5515.75		signal transduction involved in mitotic cell cycle checkpoint	0.000581001
inflammatory response to antigenic stimulus	5509.04		signal transduction involved in mitotic DNA damage checkpoint	0.000581001
endocrine process	5508.95		signal transduction involved in mitotic DNA integrity checkpoint	0.000581001
heart morphogenesis	5504.04		gland morphogenesis	0.000583638
mast cell degranulation	5477.58		positive regulation of telomere maintenance via telomerase	0.000602326
mast cell activation involved in immune response	5477.58		G protein-coupled serotonin receptor signaling pathway	0.000602326
mast cell mediated immunity	5477.58		protein maturation	0.000606583
lysosome localization	5477.58		cellular response to starvation	0.000608901
regulation of gene silencing	5475.64		regulation of cell-matrix adhesion	0.000612327
fatty acid catabolic process	5472.55		response to water	0.000616582
monocarboxylic acid catabolic process	5472.55		regulation of granulocyte macrophage colony-stimulating factor production	0.000616582
organelle inheritance	5461.87		glial cell apoptotic process	0.000616582
Golgi inheritance	5461.87		negative regulation of circadian rhythm	0.000616582
negative regulation of cell projection organization	5440.65		organelle inheritance	0.000616582
positive regulation of endothelial cell proliferation	5429.29		Golgi inheritance	0.000616582
positive regulation of protein dephosphorylation	5410.54		positive regulation of SMAD protein signal transduction	0.000616582
positive regulation of dephosphorylation	5410.54		response to endoplasmic reticulum stress	0.000623921
regulation of sensory perception of pain	5400.11		positive regulation of cell cycle G1/S phase transition	0.00062796
regulation of sensory perception	5400.11		positive regulation of reactive oxygen species biosynthetic process	0.00062796
regulation of macrophage derived foam cell differentiation	5391.81		male sex differentiation	0.000633914
macrophage derived foam cell differentiation	5391.81		regulation of stress fiber assembly	0.000638843
foam cell differentiation	5391.81		negative regulation of cation transmembrane transport	0.000638843
regulation of cytokine production involved in immune response	5373.86		negative regulation of G1/S transition of mitotic cell cycle	0.000642124
phenol-containing compound metabolic process	5367.59		negative regulation of cell development	0.000646171
hexose biosynthetic process	5357.98		response to starvation	0.000652885
axon regeneration	5348.21		regulation of protein stability	0.000659838
neuron projection regeneration	5348.21		regulation of transcription involved in G1/S transition of mitotic cell cycle	0.000673966
hormone biosynthetic process	5335.25		nucleobase metabolic process	0.000673966
cytokine secretion	5330.86		dopamine secretion	0.000673966
CD4-positive, alpha-beta T cell activation	5330.61		regulation of dopamine secretion	0.000673966
regulation of bone mineralization	5323.4		positive regulation of interleukin-12 production	0.000673966
positive regulation of tissue remodeling	5321.94		response to sterol	0.000673966
cellular response to dexamethasone stimulus	5321.37		regulation of type I interferon-mediated signaling pathway	0.000673966
response to dexamethasone	5321.37		response to interleukin-4	0.000673966
regulation of cellular respiration	5319.6		regulation of renal system process	0.000673966
C21-steroid hormone biosynthetic process	5299.01		negative regulation of calcium ion transmembrane transporter activity	0.000673966
C21-steroid hormone metabolic process	5299.01		regulation of cell killing	0.000676957
steroid hormone biosynthetic process	5299.01		positive regulation of cell killing	0.000677705
regulation of glycolytic process	5297.21		regulation of glucose import	0.000677705
regulation of carbohydrate catabolic process	5297.21		positive regulation of wound healing	0.000677705
positive regulation of endopeptidase activity	5294.35		regulation of telomere maintenance via telomere lengthening	0.000677705
regulation of mast cell degranulation	5287.41		extracellular matrix organization	0.000686213
regulation of mast cell activation involved in immune response	5287.41		purine-containing compound biosynthetic process	0.000699538
regulation of leukocyte degranulation	5287.41		regulation of I-kappaB kinase/NF-kappaB signaling	0.000699924
regulation of myeloid leukocyte mediated immunity	5287.41		extracellular structure organization	0.000702429
negative regulation of ATP metabolic process	5265.26		production of molecular mediator involved in inflammatory response	0.000716808
circadian regulation of gene expression	5263.87		interaction with symbiont	0.000716808
polyol metabolic process	5263.4		regulation of protein tyrosine kinase activity	0.000716808
regulation of purine nucleotide biosynthetic process	5262.64		negative regulation of response to wounding	0.000716808
regulation of nucleotide biosynthetic process	5262.64		regulation of protein catabolic process	0.000718968
regulation of heart rate	5261.16		regulation of dephosphorylation	0.000723865
regulation of cation channel activity	5254.8		regulation of protein-containing complex assembly	0.000729941
retina development in camera-type eye	5250.25		regulation of tumor necrosis factor-mediated signaling pathway	0.000730342
response to water	5250.23		negative regulation of innate immune response	0.000730342
675.81658iary alcohol metabolic process	5247.04		positive regulation of cardiac muscle tissue development	0.000730342
synaptic transmission, cholinergic	5236.02		export across plasma membrane	0.000730342
lymphocyte activation involved in immune response	5234.73		defense response to bacterium	0.000733338
cellular response to amyloid-beta	5229.5		regulation of amino acid transport	0.000751436
response to progesterone	5221.78		neutrophil homeostasis	0.000752455
receptor internalization	5212.51		renal system process involved in regulation of blood volume	0.000752455
regulation of stem cell proliferation	5198.36		epithelial cell maturation	0.000752455
stem cell proliferation	5198.36		leukocyte migration involved in inflammatory response	0.000752455
histone deacetylation	5196.84		positive regulation of type 2 immune response	0.000752455
protein deacetylation	5196.84		regulation of norepinephrine secretion	0.000752455
protein deacylation	5196.84		lipoxygenase pathway	0.000752455
macromolecule deacylation	5196.84		cell proliferation in hindbrain	0.000752455
positive regulation of telomerase activity	5192.09		granulocyte macrophage colony-stimulating factor production	0.000752455
quinone metabolic process	5186.27		positive regulation of mast cell activation involved in immune response	0.000752455
regulation of type I interferon-mediated signaling pathway	5184.47		negative regulation of myeloid cell apoptotic process	0.000752455
I-kappaB kinase/NF-kappaB signaling	5180.95		positive regulation of mast cell degranulation	0.000752455
positive regulation of myeloid cell differentiation	5179.56		hepatocyte growth factor receptor signaling pathway	0.000752455
interleukin-2-mediated signaling pathway	5176.05		negative regulation of behavior	0.000752455
cellular response to interleukin-2	5176.05		intestinal epithelial cell development	0.000752455
response to interleukin-2	5176.05		cellular response to prostaglandin E stimulus	0.000752455
striatum development	5162.13		cellular response to estrogen stimulus	0.000752455
subpallium development	5162.13		regulation of epithelial cell apoptotic process	0.00075845
columnar/cuboidal epithelial cell differentiation	5149.59		embryonic organ development	0.000762047
positive regulation of blood circulation	5135.69		interleukin-10 production	0.000785974
positive regulation of stress-activated MAPK cascade	5128.78		positive regulation of organ growth	0.000785974
positive regulation of stress-activated protein kinase signaling cascade	5128.78		regulation of heart contraction	0.000789763
regulation of endoplasmic reticulum stress-induced intrinsic apoptotic signaling pathway	5123.77		type I interferon signaling pathway	0.000801937
positive regulation of cysteine-type endopeptidase activity	5102		regulation of biomineral tissue development	0.000801937
ER-nucleus signaling pathway	5099.91		cellular response to type I interferon	0.000801937
positive regulation of interleukin-1 production	5094.31		regulation of biomineralization	0.000801937
maternal placenta development	5093.71		positive regulation of stress-activated MAPK cascade	0.000801987
negative regulation of wound healing	5091.19		vitamin metabolic process	0.000808825
negative regulation of response to wounding	5091.19		positive regulation of autophagy	0.000808825
positive regulation of neuron death	5086.58		secretion by tissue	0.000834993
regulation of glucose metabolic process	5085.99		regulation of superoxide metabolic process	0.000834993
negative regulation of macrophage derived foam cell differentiation	5066.66		amyloid-beta clearance	0.000834993
positive regulation of cysteine-type endopeptidase activity involved in apoptotic process	5065.77		positive regulation of telomere maintenance via telomere lengthening	0.000834993
positive regulation of vascular associated smooth muscle cell proliferation	5059.15		regulation of leukocyte adhesion to vascular endothelial cell	0.000834993
regulation of oxidative stress-induced cell death	5046.13		polyol biosynthetic process	0.000844708
positive regulation of long-term synaptic potentiation	5044.64		negative regulation of cell cycle G1/S phase transition	0.000845931
positive regulation of macroautophagy	5037.24		nucleocytoplasmic transport	0.000850739
regulation of deacetylase activity	5027.38		positive regulation of stress-activated protein kinase signaling cascade	0.000865361
regulation of histone deacetylation	5027.38		signal transduction in response to DNA damage	0.000884367
regulation of protein deacetylation	5027.38		regulation of ERBB signaling pathway	0.000894666
positive regulation of telomere capping	5020.68		positive regulation of neuron death	0.000894666
regulation of telomere capping	5020.68		response to chemokine	0.000894666
positive regulation of telomere maintenance via telomerase	5020.68		cellular response to chemokine	0.000894666
positive regulation of telomere maintenance via telomere lengthening	5020.68		chemosensory behavior	0.000905975
positive regulation of telomere maintenance	5020.68		prostaglandin transport	0.000905975
regulation of telomere maintenance via telomerase	5020.68		response to caffeine	0.000905975
telomere capping	5020.68		heat generation	0.000905975
regulation of glucose import	5019.62		positive regulation of circadian rhythm	0.000905975
glucose import	5019.62		positive regulation of gluconeogenesis	0.000905975
positive regulation of behavior	5017.81		norepinephrine secretion	0.000905975
cell adhesion mediated by integrin	5011.93		thymocyte apoptotic process	0.000905975
positive regulation of interleukin-1 beta production	5009.57		regulation of cholesterol metabolic process	0.000906651
activation of phospholipase C activity	5001.92		nuclear transport	0.000915087
positive regulation of protein localization to membrane	4999.34		positive regulation of cysteine-type endopeptidase activity involved in apoptotic process	0.000924169
ephrin receptor signaling pathway	4993.74		response to organophosphorus	0.000924169
regulation of I-kappaB kinase/NF-kappaB signaling	4988.6		osteoclast differentiation	0.00094402
serotonin transport	4979.09		regulation of steroid biosynthetic process	0.00094402
positive regulation of cholesterol efflux	4977.04		regulation of cell-substrate adhesion	0.000944423
positive regulation of sterol transport	4977.04		B cell receptor signaling pathway	0.000965368
positive regulation of cholesterol transport	4977.04		negative regulation of reactive oxygen species metabolic process	0.000971911
positive regulation of bone resorption	4971.48		negative regulation of cytokine production	0.000983447
positive regulation of bone remodeling	4971.48		response to type I interferon	0.000995443
regulation of cytoplasmic transport	4958.92		regulation of macroautophagy	0.00100417
dendrite development	4953.04		cell cycle checkpoint	0.00100733
positive regulation of phospholipid metabolic process	4952.34		activation of adenylate cyclase activity	0.0010214
long-chain fatty acid biosynthetic process	4936.62		serotonin receptor signaling pathway	0.0010214
positive regulation of urine volume	4931.13		positive regulation of glucose import	0.0010214
positive regulation of renal sodium excretion	4931.13		positive chemotaxis	0.0010406
prepulse inhibition	4931.13		T cell migration	0.0010406
negative regulation of DNA-binding transcription factor activity	4909.54		positive regulation of production of molecular mediator of immune response	0.00104899
mesenchymal cell differentiation	4904.01		monosaccharide biosynthetic process	0.00104899
SMAD protein signal transduction	4903.88		response to hydroperoxide	0.00107799
serotonin secretion	4894.35		neurotransmitter biosynthetic process	0.00107799
response to cholesterol	4893.83		retina vasculature development in camera-type eye	0.00107799
regulation of lymphocyte differentiation	4892.73		cellular response to ATP	0.00107799
lymphocyte homeostasis	4872.65		regulation of ceramide biosynthetic process	0.00107799
odontogenesis of dentin-containing tooth	4871.15		detoxification	0.0010977
odontogenesis	4871.15		mitotic DNA damage checkpoint	0.00110473
dendrite morphogenesis	4868.31		positive regulation of myeloid cell differentiation	0.00110473
killing of cells of other organism	4865.25		regulation of chemokine production	0.00111282
response to dsRNA	4864.81		cell maturation	0.00111953
neutral lipid catabolic process	4859.61		regulation of systemic arterial blood pressure by hormone	0.00112476
acylglycerol catabolic process	4859.61		intestinal absorption	0.00112476
T cell activation involved in immune response	4859.13		regulation of actomyosin structure organization	0.0011627
negative regulation of macroautophagy	4858.88		positive regulation of ubiquitin-dependent protein catabolic process	0.0011627
regulation of fatty acid oxidation	4852.79		ovulation cycle	0.0011887
chronic inflammatory response	4850		positive regulation of protein catabolic process	0.0012167
corticosteroid receptor signaling pathway	4839.41		neutrophil chemotaxis	0.00122298
negative regulation of smooth muscle cell proliferation	4834.29		negative regulation of ion transmembrane transport	0.00122298
regulation of intracellular steroid hormone receptor signaling pathway	4821.29		peptidyl-tyrosine dephosphorylation	0.00122298
positive regulation of SMAD protein signal transduction	4817.2		dopamine receptor signaling pathway	0.00123523
regulation of SMAD protein signal transduction	4817.2		negative regulation of calcium ion transmembrane transport	0.00123523
mitotic nuclear envelope disassembly	4814.16		positive regulation of chromosome organization	0.00124524
membrane disassembly	4814.16		cytokine production involved in inflammatory response	0.00126833
nuclear envelope disassembly	4814.16		regulation of cholesterol transport	0.00126833
nuclear envelope organization	4814.16		gastric acid secretion	0.00126931
response to caffeine	4812.42		regulation of systemic arterial blood pressure by circulatory renin-angiotensin	0.00126931
positive regulation of cell cycle G1/S phase transition	4806.77		glucocorticoid biosynthetic process	0.00126931
dendritic cell migration	4804.43		G protein-coupled acetylcholine receptor signaling pathway	0.00126931
secondary metabolic process	4791.75		negative regulation of platelet activation	0.00126931
inflammatory response to wounding	4786.55		positive regulation of superoxide anion generation	0.00126931
regulation of myeloid leukocyte differentiation	4785.49		response to vitamin A	0.00126931
tumor necrosis factor-mediated signaling pathway	4764.64		trachea development	0.00126931
cellular response to interleukin-4	4756.45		regulation of sphingolipid biosynthetic process	0.00126931
response to interleukin-4	4756.45		regulation of membrane lipid metabolic process	0.00126931
negative regulation of cardiocyte differentiation	4754.71		cytokine production involved in immune response	0.00128563
retinoic acid receptor signaling pathway	4753.39		T cell mediated immunity	0.00128563
pigment metabolic process	4751.53		regulation of actin filament bundle assembly	0.00128563
negative regulation of cytokine-mediated signaling pathway	4743.61		mammary gland development	0.00129586
negative regulation of response to cytokine stimulus	4743.61		regulation of JNK cascade	0.00133512
response to fatty acid	4739.54		acidic amino acid transport	0.00135184
T cell homeostasis	4730.99		regulation of digestive system process	0.00135309
negative regulation of synaptic transmission, glutamatergic	4729.67		regulation of calcium ion import	0.00135309
positive regulation of vasoconstriction	4721.18		detection of abiotic stimulus	0.0014049
regulation of actin cytoskeleton organization	4713.59		response to ionizing radiation	0.0014049
lipid export from cell	4706.82		contractile actin filament bundle assembly	0.00141825
negative regulation of oxidoreductase activity	4701.27		stress fiber assembly	0.00141825
positive regulation of G2/M transition of mitotic cell cycle	4696.47		regulation of peptidyl-serine phosphorylation	0.00146204
positive regulation of cell cycle G2/M phase transition	4696.47		intrinsic apoptotic signaling pathway in response to oxidative stress	0.00147857
positive regulation of tumor necrosis factor production	4691.02		bicarbonate transport	0.00147857
positive regulation of tumor necrosis factor superfamily cytokine production	4691.02		regulation of T cell receptor signaling pathway	0.00147857
sensory organ morphogenesis	4683.05		lymphocyte activation involved in immune response	0.00147955
prostate gland development	4669.13		negative regulation of MAPK cascade	0.00147955
response to manganese ion	4664.85		morphogenesis of a branching epithelium	0.00147955
negative regulation of lipid metabolic process	4663.73		chronic inflammatory response	0.00148071
chromosome condensation	4660.23		I-kappaB phosphorylation	0.00148071
porphyrin-containing compound metabolic process	4652.83		copulation	0.00148071
negative regulation of lipid transport	4645.66		purine ribonucleoside monophosphate biosynthetic process	0.00148071
cellular response to ATP	4633.8		response to manganese ion	0.00148071
response to ATP	4633.8		positive regulation of cholesterol efflux	0.00148071
regulation of intracellular estrogen receptor signaling pathway	4629.18		regulation of fatty acid beta-oxidation	0.00148071
positive regulation of cellular amide metabolic process	4628.95		regulation of icosanoid secretion	0.00148071
positive regulation of oxidative phosphorylation	4624		connective tissue replacement	0.00148071
ventricular cardiac muscle cell development	4624		positive regulation of amyloid-beta formation	0.00148071
acute inflammatory response to antigenic stimulus	4622.87		tertiary alcohol metabolic process	0.00148071
positive regulation of leukocyte apoptotic process	4611.09		DNA damage response, signal transduction by p53 class mediator	0.00148835
positive regulation of blood vessel endothelial cell migration	4604.27		signal transduction involved in DNA integrity checkpoint	0.00153093
positive regulation of ion transmembrane transport	4598.37		signal transduction involved in DNA damage checkpoint	0.00153093
regulation of lymphocyte mediated immunity	4589.55		synapse organization	0.00157563
negative regulation of lymphocyte apoptotic process	4588.21		nucleoside monophosphate biosynthetic process	0.00161193
immune response-regulating cell surface receptor signaling pathway involved in phagocytosis	4588.07		regulation of endocrine process	0.00161193
Fc-gamma receptor signaling pathway involved in phagocytosis	4588.07		positive regulation of glial cell differentiation	0.00161193
Fc-gamma receptor signaling pathway	4588.07		positive regulation of insulin secretion	0.00162675
Fc receptor mediated stimulatory signaling pathway	4588.07		signal transduction involved in cell cycle checkpoint	0.00162675
polyol biosynthetic process	4587.59		positive regulation of response to wounding	0.00162675
columnar/cuboidal epithelial cell development	4584.36		T cell activation involved in immune response	0.00163643
regulation of insulin receptor signaling pathway	4581.82		in utero embryonic development	0.00166243
regulation of cellular response to insulin stimulus	4581.82		regulation of mitochondrion organization	0.00169112
response to food	4581.6		regulation of synaptic plasticity	0.00169112
response to testosterone	4578.47		positive regulation of cellular extravasation	0.00171293
negative regulation of T cell apoptotic process	4567.51		platelet formation	0.00171293
regulation of T cell apoptotic process	4567.51		positive regulation of phosphoprotein phosphatase activity	0.00171293
T cell apoptotic process	4567.51		regulation of renal sodium excretion	0.00171293
interleukin-35-mediated signaling pathway	4564.27		linoleic acid metabolic process	0.00171293
negative regulation of ion transmembrane transporter activity	4556.05		positive regulation of alpha-beta T cell proliferation	0.00171293
negative regulation of transporter activity	4556.05		cellular response to fluid shear stress	0.00171293
negative regulation of cation transmembrane transport	4556.05		positive regulation of calcium ion import	0.00171293
negative regulation of ion transmembrane transport	4556.05		regulation of microglial cell activation	0.00171293
alpha-beta T cell differentiation	4549.87		nucleoside triphosphate metabolic process	0.00171455
morphogenesis of an epithelial fold	4547.88		regulation of leukocyte mediated cytotoxicity	0.00172689
regulation of protein export from nucleus	4538.33		cholesterol biosynthetic process	0.00172689
decidualization	4528.49		chemokine production	0.00172689
positive regulation of lymphocyte apoptotic process	4526.36		regulation of intracellular steroid hormone receptor signaling pathway	0.00172689
toll-like receptor signaling pathway	4513.88		glucose import	0.00172689
pattern recognition receptor signaling pathway	4513.88		regulation of protein acetylation	0.00172689
positive regulation of calcium ion transport into cytosol	4513.64		secondary alcohol biosynthetic process	0.00172689
positive regulation of 84.7329ptive immune response	4495.97		multicellular organism growth	0.00177547
interleukin-10 production	4487.94		retina development in camera-type eye	0.00177547
positive regulation of lipid kinase activity	4475.32		regulation of interleukin-1 production	0.00179546
regulation of lipid kinase activity	4475.32		associative learning	0.00183149
T cell mediated immunity	4474.2		T cell differentiation in thymus	0.00183149
positive regulation of cell migration involved in sprouting angiogenesis	4462.61		positive regulation of B cell activation	0.00184399
CD4-positive, alpha-beta T cell differentiation	4444.44		developmental maturation	0.00185917
lipopolysaccharide-mediated signaling pathway	4442.5		regulation of Ras protein signal transduction	0.00186497
regulation of lyase activity	4429.21		regulation of cholesterol efflux	0.00190333
positive regulation of protein tyrosine kinase activity	4429.06		response to progesterone	0.00190333
negative regulation of extrinsic apoptotic signaling pathway via death domain receptors	4428.81		detection of mechanical stimulus	0.00190333
positive regulation of G1/S transition of mitotic cell cycle	4428.68		toll-like receptor signaling pathway	0.00191453
positive regulation of glucose transmembrane transport	4422.37		positive regulation of gliogenesis	0.00194065
vascular wound healing	4416.13		regulation of bone mineralization	0.00194065
purine ribonucleoside metabolic process	4415.62		regulation of oxidative stress-induced cell death	0.00194065
purine nucleoside metabolic process	4415.62		natural killer cell differentiation	0.00196668
ribonucleoside metabolic process	4415.62		purine nucleoside monophosphate biosynthetic process	0.00196668
negative regulation of mast cell activation	4412.35		cobalamin metabolic process	0.00196668
positive regulation of 84.7329ptive immune response based on somatic recombination of immune receptors built from immunoglobulin superfamily domains	4411.24		regulation of superoxide anion generation	0.00196668
regulation of interleukin-10 production	4403.21		positive regulation of mast cell activation	0.00196668
homeostasis of number of cells within a tissue	4402.36		diol biosynthetic process	0.00196668
ceramide biosynthetic process	4399.87		regulation of urine volume	0.00196668
leukotriene metabolic process	4398.14		platelet morphogenesis	0.00196668
regulation of cell adhesion mediated by integrin	4394.56		positive regulation of nitric-oxide synthase activity	0.00196668
positive regulation of lipid catabolic process	4392.03		forebrain development	0.0019743
leukocyte adhesion to vascular endothelial cell	4384.9		cartilage development	0.00205264
regulation of collagen biosynthetic process	4378.16		CD4-positive, alpha-beta T cell differentiation	0.00205449
regulation of collagen metabolic process	4378.16		regulation of multi-organism process	0.00205449
collagen biosynthetic process	4378.16		acute-phase response	0.00206187
cellular response to estradiol stimulus	4371.09		macrophage differentiation	0.00206187
activation of cysteine-type endopeptidase activity involved in apoptotic process	4369.25		negative regulation of lipid transport	0.00206187
cellular response to estrogen stimulus	4366.14		regulation of leukocyte degranulation	0.00206187
catecholamine metabolic process	4363.46		negative regulation of lymphocyte activation	0.00206189
catechol-containing compound metabolic process	4363.46		renal system development	0.00210909
regulation of acute inflammatory response	4361.83		branching morphogenesis of an epithelial tube	0.00213878
positive regulation of leukocyte adhesion to vascular endothelial cell	4359.82		receptor internalization	0.00214841
regulation of leukocyte adhesion to vascular endothelial cell	4359.82		negative regulation of developmental growth	0.00214841
regulation of cytokine secretion	4355.77		histone deacetylation	0.00217313
positive regulation of lipid biosynthetic process	4347.8		positive regulation of blood vessel endothelial cell migration	0.00217313
negative regulation of leukocyte migration	4335.37		cellular carbohydrate metabolic process	0.00221635
positive regulation of cytokine secretion	4335.07		negative regulation of adaptive immune response	0.0022293
fatty acid beta-oxidation	4331.19		negative regulation of epithelial cell apoptotic process	0.0022293
guanosine-containing compound metabolic process	4330.88		negative regulation of locomotion	0.00223844
regulation of signal transduction by p53 class mediator	4324.22		positive regulation of neurotransmitter secretion	0.00224263
interleukin-7-mediated signaling pathway	4323.87		embryonic hemopoiesis	0.00224263
response to interleukin-7	4323.87		renal sodium excretion	0.00224263
cellular response to interleukin-7	4323.87		purine nucleoside biosynthetic process	0.00224263
mating	4307.79		ribonucleoside biosynthetic process	0.00224263
positive regulation of insulin secretion	4294.07		tongue development	0.00224263
prostate gland epithelium morphogenesis	4291.05		positive regulation of fatty acid biosynthetic process	0.00224263
prostate gland morphogenesis	4291.05		purine ribonucleoside biosynthetic process	0.00224263
regulation of calcium-mediated signaling	4290.51		positive regulation of oligodendrocyte differentiation	0.00224263
cellular response to epidermal growth factor stimulus	4258.06		negative regulation of posttranscriptional gene silencing	0.00224263
regulation of digestive system process	4249.81		negative regulation of gene silencing by RNA	0.00224263
centrosome cycle	4242.45		positive regulation of long-term synaptic potentiation	0.00224263
microtubule organizing center organization	4242.45		regulation of bicellular tight junction assembly	0.00224263
protein acetylation	4241.08		actomyosin structure organization	0.00225487
protein acylation	4241.08		small molecule catabolic process	0.00229478
endothelial cell differentiation	4238.52		regulation of telomere maintenance	0.00229669
endothelium development	4238.52		endothelial cell differentiation	0.00234337
intrinsic apoptotic signaling pathway in response to oxidative stress	4236.06		glandular epithelial cell differentiation	0.00240587
regulation of neuroblast proliferation	4231.68		phospholipid catabolic process	0.00240587
hematopoietic progenitor cell differentiation	4226.24		dopamine transport	0.00240587
prostaglandin biosynthetic process	4219.17		T cell selection	0.00240587
prostanoid biosynthetic process	4219.17		trabecula morphogenesis	0.00240587
prostanoid metabolic process	4219.17		positive regulation of G1/S transition of mitotic cell cycle	0.00240587
prostaglandin metabolic process	4219.17		negative regulation of cytokine-mediated signaling pathway	0.00242529
positive regulation of glucose import	4218.18		sterol biosynthetic process	0.00242529
response to interleukin-9	4216.5		defense response to Gram-negative bacterium	0.00242529
interleukin-15-mediated signaling pathway	4216.5		regulation of release of sequestered calcium ion into cytosol	0.00242529
cellular response to interleukin-15	4216.5		positive regulation of cell cycle arrest	0.00242529
response to interleukin-15	4216.5		phosphatidylinositol biosynthetic process	0.0024457
positive regulation of wound healing	4197.62		cell aging	0.0024457
positive regulation of response to wounding	4197.62		sterol transport	0.0024457
negative regulation of amino acid transport	4196.16		regulation of interleukin-6 production	0.00246876
branching morphogenesis of a nerve	4195.44		adrenal gland development	0.00254144
regulation of dopamine receptor signaling pathway	4195.44		positive regulation of interleukin-4 production	0.00254144
negative regulation of G protein-coupled receptor signaling pathway	4190.77		response to prostaglandin E	0.00254144
negative regulation of endoplasmic reticulum stress-induced intrinsic apoptotic signaling pathway	4184.91		regulation of excretion	0.00254144
positive regulation of neurotransmitter secretion	4183.46		positive regulation of glycolytic process	0.00254144
protein ADP-ribosylation	4174.42		positive regulation of lyase activity	0.00254144
regulation of chronic inflammatory response	4174.18		branching involved in mammary gland duct morphogenesis	0.00254144
regulation of cyclin-dependent protein serine/threonine kinase activity	4169.86		positive regulation of amyloid precursor protein catabolic process	0.00254144
regulation of cyclin-dependent protein kinase activity	4169.86		positive regulation of mitochondrion organization	0.00255136
regulation of cellular response to heat	4167.62		female sex differentiation	0.00255136
body fluid secretion	4163.72		central nervous system neuron development	0.00255903
regulation of action potential	4162.93		positive regulation of response to biotic stimulus	0.00256619
action potential	4162.93		positive regulation of T cell mediated immunity	0.00259183
aminoglycoside antibiotic metabolic process	4162.68		regulation of systemic arterial blood pressure mediated by a chemical signal	0.00259183
cellular response to aldehyde	4162.68		negative regulation of blood coagulation	0.00259183
glycoside metabolic process	4162.68		digestive tract morphogenesis	0.00259183
dopamine secretion	4142.04		regulation of actin filament-based process	0.00263496
regulation of dopamine secretion	4142.04		positive regulation of ion transmembrane transport	0.00264779
dopamine transport	4142.04		regulation of cytokine production involved in immune response	0.00269805
negative regulation of 84.7329ptive immune response	4119.97		positive regulation of reproductive process	0.00269805
regulation of microtubule-based process	4108.74		muscle organ development	0.00274255
metanephros development	4106.83		interleukin-1 production	0.00277292
response to thyroid hormone	4089.59		ER-nucleus signaling pathway	0.00278742
protein auto-ADP-ribosylation	4087.74		positive regulation of telomere maintenance	0.00278742
homotypic cell-cell adhesion	4072.29		vascular endothelial growth factor signaling pathway	0.00278742
negative regulation of muscle contraction	4070.38		negative regulation of hemostasis	0.00278742
positive regulation of lymphocyte proliferation	4033.89		stem cell development	0.00284247
positive regulation of mononuclear cell proliferation	4033.89		regulation of chromosome organization	0.00285974
positive regulation of cyclin-dependent protein serine/threonine kinase activity	4026.25		positive regulation of receptor internalization	0.0028637
positive regulation of cyclin-dependent protein kinase activity	4026.25		renal system process involved in regulation of systemic arterial blood pressure	0.0028637
regulation of cell killing	4025.72		norepinephrine transport	0.0028637
B cell receptor signaling pathway	4025.58		positive regulation of leukocyte degranulation	0.0028637
positive regulation of interleukin-12 production	4019.32		positive regulation of positive chemotaxis	0.0028637
regulation of production of small RNA involved in gene silencing by RNA	4015.17		morphogenesis of an epithelial fold	0.0028637
dsRNA processing	4015.17		intestinal epithelial cell differentiation	0.0028637
production of small RNA involved in gene silencing by RNA	4015.17		regulation of production of small RNA involved in gene silencing by RNA	0.0028637
negative regulation of leukocyte differentiation	4008.21		cellular response to angiotensin	0.0028637
regulation of leukocyte mediated cytotoxicity	4005.02		neutrophil migration	0.00288896
response to amino acid	4003.74		production of molecular mediator of immune response	0.00295575
regulation of neuroinflammatory response	4001.67		positive regulation of protein binding	0.00299238
dendritic spine organization	3997.41		negative regulation of cysteine-type endopeptidase activity involved in apoptotic process	0.00299238
cardiac chamber morphogenesis	3993.85		calcium ion import	0.00299238
cardiac chamber development	3993.85		positive regulation of leukocyte mediated cytotoxicity	0.00299288
negative regulation of systemic arterial blood pressure	3991.35		negative regulation of leukocyte mediated immunity	0.00299288
regulation of response to reactive oxygen species	3986.78		nuclear envelope organization	0.00299288
cellular response to amino acid starvation	3984.37		axon regeneration	0.00299288
response to amino acid starvation	3984.37		regulation of chondrocyte differentiation	0.00299288
positive regulation of fatty acid oxidation	3972.79		negative regulation of cation channel activity	0.00299288
cellular hyperosmotic response	3970.33		regulation of carbohydrate metabolic process	0.00304419
negative regulation of smooth muscle contraction	3964.95		cell-substrate adhesion	0.00304845
relaxation of smooth muscle	3964.95		heart morphogenesis	0.00308164
relaxation of muscle	3964.95		endomembrane system organization	0.00309253
detection of mechanical stimulus involved in sensory perception of pain	3960.46		regulation of actin cytoskeleton organization	0.00311354
detection of mechanical stimulus involved in sensory perception	3960.46		mitotic cell cycle checkpoint	0.00313906
detection of mechanical stimulus	3960.46		activation of cysteine-type endopeptidase activity involved in apoptotic process	0.00314793
calcium ion import	3960.26		regulation of smooth muscle cell migration	0.00314793
positive regulation of receptor biosynthetic process	3957.37		regulation of Rho protein signal transduction	0.00314793
acute-phase response	3954.87		regulation of tyrosine phosphorylation of STAT protein	0.00314793
peptide hormone processing	3952.82		telencephalon development	0.00316151
signaling receptor ligand precursor processing	3952.82		regulation of telomere maintenance via telomerase	0.00320845
response to vitamin A	3942.27		negative regulation of G protein-coupled receptor signaling pathway	0.00320845
regulation of T cell differentiation	3933.18		glandular epithelial cell development	0.00321002
secretion by tissue	3933.13		regulation of systemic arterial blood pressure by renin-angiotensin	0.00321002
response to copper ion	3928.76		C21-steroid hormone biosynthetic process	0.00321002
positive regulation of regulated secretory pathway	3924.8		glucocorticoid metabolic process	0.00321002
positive regulation of exocytosis	3924.8		positive regulation of nucleotide biosynthetic process	0.00321002
regulation of vascular permeability	3920.83		response to immobilization stress	0.00321002
chemokine-mediated signaling pathway	3907.81		regulation of positive chemotaxis	0.00321002
response to chemokine	3907.81		killing by host of symbiont cells	0.00321002
cellular response to chemokine	3907.81		regulation of SMAD protein signal transduction	0.00321002
olefinic compound biosynthetic process	3897.88		response to thyroid hormone	0.00321002
positive regulation of gliogenesis	3847.97		positive regulation of purine nucleotide biosynthetic process	0.00321002
central nervous system neuron development	3840.81		regulation of cytoplasmic transport	0.00321002
regulation of smooth muscle cell migration	3839.05		purine nucleoside triphosphate metabolic process	0.00330923
smooth muscle cell migration	3839.05		positive regulation of proteasomal ubiquitin-dependent protein catabolic process	0.00330923
muscle cell migration	3839.05		negative regulation of response to cytokine stimulus	0.00330923
cellular response to iron ion	3832.13		catecholamine metabolic process	0.00343437
macrophage proliferation	3814.66		response to fungus	0.00343437
cellular response to retinoic acid	3813.48		catechol-containing compound metabolic process	0.00343437
negative regulation of protein serine/threonine kinase activity	3807.94		response to zinc ion	0.00343437
nucleobase metabolic process	3807.53		positive regulation of interleukin-8 production	0.00343437
cellular response to fatty acid	3800.68		positive regulation of proteolysis involved in cellular protein catabolic process	0.0035245
regulation of systemic arterial blood pressure by hormone	3798.65		positive regulation of protein localization to membrane	0.0035245
regulation of systemic arterial blood pressure mediated by a chemical signal	3798.65		steroid catabolic process	0.00358092
female sex differentiation	3796.49		astrocyte activation	0.00358092
superoxide metabolic process	3782.66		positive regulation of behavior	0.00358092
positive regulation of leukocyte differentiation	3771.6		negative regulation of cardiocyte differentiation	0.00358092
regulation of microglial cell activation	3761.26		extrinsic apoptotic signaling pathway via death domain receptors	0.00364952
activation of adenylate cyclase activity	3756.38		regulation of calcium ion transmembrane transporter activity	0.00364952
response to electrical stimulus	3753.56		stem cell proliferation	0.00366315
regulation of cGMP-mediated signaling	3751.1		telomere capping	0.00367086
positive regulation of glycolytic process	3744.44		regulation of fatty acid biosynthetic process	0.00367086
leukocyte migration involved in inflammatory response	3742.45		negative regulation of coagulation	0.00367086
phosphatidylinositol metabolic process	3726.99		positive regulation of oxidoreductase activity	0.00367086
negative regulation of lipid catabolic process	3724.87		negative regulation of cellular catabolic process	0.0036756
triglyceride catabolic process	3718.25		regulation of ion transmembrane transporter activity	0.0036756
Rho protein signal transduction	3713.12		regulation of epithelial cell differentiation	0.00369717
regulation of protein targeting	3710.81		glycosyl compound metabolic process	0.00380582
negative regulation of chondrocyte differentiation	3707.12		regulation of epidermal growth factor receptor signaling pathway	0.00382877
negative regulation of cartilage development	3707.12		signal transduction by p53 class mediator	0.00386082
regulation of chondrocyte differentiation	3707.12		negative regulation of peptidyl-tyrosine phosphorylation	0.00391817
regulation of cartilage development	3707.12		regulation of morphogenesis of a branching structure	0.00391817
negative regulation of MAP kinase activity	3700.56		positive regulation of regulated secretory pathway	0.00391817
leukotriene biosynthetic process	3694.09		negative regulation of nervous system development	0.00396666
positive regulation of intracellular estrogen receptor signaling pathway	3690.32		T cell chemotaxis	0.00397695
positive regulation of intracellular steroid hormone receptor signaling pathway	3690.32		positive regulation of blood coagulation	0.00397695
negative regulation of gliogenesis	3687.62		mammary gland epithelial cell proliferation	0.00397695
regulation of tyrosine phosphorylation of STAT protein	3680.48		diol metabolic process	0.00397695
vascular endothelial growth factor signaling pathway	3664.34		killing of cells in other organism involved in symbiotic interaction	0.00397695
neural tube formation	3662.52		adenylate cyclase-activating adrenergic receptor signaling pathway	0.00397695
embryonic epithelial tube formation	3662.52		positive regulation of hemostasis	0.00397695
epithelial tube formation	3662.52		regulation of endoplasmic reticulum unfolded protein response	0.00397695
epithelial cell maturation	3660.52		negative regulation of ATP metabolic process	0.00397695
regulation of osteoclast differentiation	3654.53		regulation of fatty acid transport	0.00397695
positive regulation of lymphocyte mediated immunity	3650.69		odontogenesis of dentin-containing tooth	0.00401423
embryonic hemopoiesis	3606.82		regulation of neural precursor cell proliferation	0.00401423
negative regulation of cation channel activity	3590.88		ribose phosphate metabolic process	0.00402813
regulation of synaptic transmission, dopaminergic	3583.72		cardiac chamber morphogenesis	0.00410347
peroxisome proliferator activated receptor signaling pathway	3581.92		intracellular estrogen receptor signaling pathway	0.00417652
positive regulation of T cell proliferation	3580.42		hydrogen peroxide metabolic process	0.00417652
positive regulation of T cell mediated immunity	3565.96		regulation of insulin secretion involved in cellular response to glucose stimulus	0.00417652
regulation of T cell mediated immunity	3565.96		regulation of action potential	0.00417652
chemosensory behavior	3561.02		regulation of phosphatase activity	0.00419557
negative regulation of circadian rhythm	3543.62		positive regulation of histone modification	0.00420602
negative regulation of behavior	3543.62		positive regulation of T cell differentiation	0.00420602
negative regulation of ERBB signaling pathway	3543.54		neuron projection organization	0.00420602
adrenal gland development	3541.42		regulation of Wnt signaling pathway	0.00423138
positive regulation of phosphoprotein phosphatase activity	3530.84		polyol metabolic process	0.00425859
positive regulation of phosphatase activity	3530.84		nitric oxide mediated signal transduction	0.0043986
phosphatidylcholine acyl-chain remodeling	3530.68		regulation of histone deacetylation	0.0043986
digestive tract morphogenesis	3518.87		positive regulation of sterol transport	0.0043986
T cell costimulation	3514.64		positive regulation of cholesterol transport	0.0043986
lymphocyte costimulation	3514.64		regulation of B cell differentiation	0.0043986
negative regulation of endothelial cell apoptotic process	3513.18		homeostasis of number of cells within a tissue	0.0043986
regulation of epithelial cell differentiation	3509.68		positive regulation of coagulation	0.0043986
negative regulation of 84.7329ptive immune response based on somatic recombination of immune receptors built from immunoglobulin superfamily domains	3502.6		leukocyte tethering or rolling	0.0043986
negative regulation of catecholamine secretion	3488.39		potassium ion homeostasis	0.0043986
glandular epithelial cell differentiation	3485.68		smooth muscle cell migration	0.00440427
extracellular matrix disassembly	3485.42		regulation of interleukin-8 production	0.00440427
hydrocarbon metabolic process	3484.15		negative regulation of cysteine-type endopeptidase activity	0.00440427
regulation of skeletal muscle satellite cell proliferation	3474.78		positive regulation of myeloid leukocyte differentiation	0.00444614
skeletal muscle satellite cell proliferation	3474.78		regulation of myeloid leukocyte mediated immunity	0.00444614
regulation of skeletal muscle cell proliferation	3474.78		regulation of phosphatidylinositol 3-kinase activity	0.00444614
skeletal muscle cell proliferation	3474.78		purine ribonucleoside metabolic process	0.00444614
regulation of histone deacetylase activity	3470.39		negative regulation of cellular response to oxidative stress	0.00444614
negative regulation of cellular response to oxidative stress	3466.95		negative regulation of oxidative stress-induced cell death	0.00444614
negative regulation of oxidative stress-induced cell death	3466.95		positive regulation of anion transport	0.00444614
negative regulation of response to oxidative stress	3466.95		regulation of humoral immune response	0.00458177
membrane protein ectodomain proteolysis	3466.63		regulation of muscle cell apoptotic process	0.0046091
hepatocyte growth factor receptor signaling pathway	3455.19		hexose biosynthetic process	0.0046091
T-helper cell differentiation	3440.32		neuron projection regeneration	0.00472724
CD4-positive, alpha-beta T cell differentiation involved in immune response	3440.32		endothelium development	0.00474998
alpha-beta T cell activation involved in immune response	3440.32		regulation of transmembrane transporter activity	0.00478669
alpha-beta T cell differentiation involved in immune response	3440.32		positive regulation of histone acetylation	0.00484634
T cell differentiation involved in immune response	3440.32		interleukin-7-mediated signaling pathway	0.00484634
pyrimidine nucleobase metabolic process	3431.93		neurotransmitter metabolic process	0.00484634
insulin-like growth factor receptor signaling pathway	3427.28		negative regulation of biomineral tissue development	0.00484634
nucleoside monophosphate biosynthetic process	3427.03		response to cholesterol	0.00484634
nucleoside monophosphate metabolic process	3427.03		negative regulation of biomineralization	0.00484634
cellular oxidant detoxification	3423.59		beta-catenin-TCF complex assembly	0.00484634
regulation of supramolecular fiber organization	3418.99		regulation of signal transduction by p53 class mediator	0.00488826
negative regulation of T cell differentiation	3415.92		positive regulation of translation	0.00492268
negative regulation of lymphocyte differentiation	3415.92		skeletal system morphogenesis	0.00499092
positive regulation of cell killing	3408.34		energy derivation by oxidation of organic compounds	0.00501412
actomyosin structure organization	3394.1		regulation of actin filament organization	0.00501412
regulation of fatty acid beta-oxidation	3392.33		regulation of interleukin-10 production	0.00502005
positive regulation of reproductive process	3389.63		positive regulation of interleukin-1 production	0.00502005
positive regulation of leukocyte mediated cytotoxicity	3387.65		T-helper cell differentiation	0.00502005
cellular response to fluid shear stress	3383.71		positive regulation of DNA binding	0.00502005
regulation of insulin secretion involved in cellular response to glucose stimulus	3368.93		positive regulation of protein tyrosine kinase activity	0.00502005
insulin secretion involved in cellular response to glucose stimulus	3368.93		negative regulation of response to oxidative stress	0.00502005
negative regulation of calcium ion transport	3351.89		adult behavior	0.00509996
positive regulation of cardiac muscle hypertrophy	3348.97		cell-matrix adhesion	0.00525533
positive regulation of muscle hypertrophy	3348.97		import into cell	0.00525533
cellular response to amino acid stimulus	3344.97		protein deacetylation	0.00526415
cellular response to acid chemical	3344.97		regulation of interleukin-1 beta production	0.00526415
neurotransmitter reuptake	3341.11		regulation of phagocytosis	0.00526415
neurotransmitter uptake	3341.11		positive regulation of JNK cascade	0.00528188
defense response to Gram-positive bacterium	3336.41		regulation of type 2 immune response	0.00532061
collagen catabolic process	3332.86		positive regulation of cyclin-dependent protein serine/threonine kinase activity	0.00532061
negative regulation of cytosolic calcium ion concentration	3329.77		face morphogenesis	0.00532061
regulation of phagocytosis	3328.26		cellular response to dexamethasone stimulus	0.00532061
exogenous drug catabolic process	3318.4		T-helper 17 type immune response	0.00532061
drug catabolic process	3318.4		relaxation of muscle	0.00532061
drug metabolic process	3318.4		purine nucleoside metabolic process	0.00532477
regulation of growth hormone secretion	3317.29		cellular component maintenance	0.00532477
growth hormone secretion	3317.29		regulation of extrinsic apoptotic signaling pathway via death domain receptors	0.00532477
regulation of actin filament organization	3305.48		regulation of peptidyl-lysine acetylation	0.00532477
platelet-derived growth factor receptor-beta signaling pathway	3296.29		negative regulation of DNA-binding transcription factor activity	0.00534326
epoxygenase P450 pathway	3295.9		negative regulation of response to biotic stimulus	0.00549641
negative regulation of acute inflammatory response	3291.67		dicarboxylic acid transport	0.00549641
positive regulation of translation	3278.8		muscle cell apoptotic process	0.00549641
gluconeogenesis	3276.64		negative regulation of lipid metabolic process	0.00549641
hippo signaling	3260.28		T cell activation via T cell receptor contact with antigen bound to MHC molecule on antigen presenting cell	0.00557667
regulation of systemic arterial blood pressure by circulatory renin-angiotensin	3260.25		regulation of chronic inflammatory response	0.00557667
regulation of systemic arterial blood pressure by renin-angiotensin	3260.25		purine nucleobase biosynthetic process	0.00557667
positive regulation of myeloid leukocyte differentiation	3254.34		positive regulation of glutamate secretion	0.00557667
negative regulation of T cell proliferation	3252.68		virion attachment to host cell	0.00557667
negative regulation of lymphocyte proliferation	3252.68		regulation of cerebellar granule cell precursor proliferation	0.00557667
negative regulation of mononuclear cell proliferation	3252.68		aminoglycoside antibiotic metabolic process	0.00557667
negative regulation of leukocyte proliferation	3252.68		positive regulation of fatty acid beta-oxidation	0.00557667
learning	3246.46		positive regulation of prostaglandin secretion	0.00557667
molting cycle	3245.78		regulation of glial cell apoptotic process	0.00557667
hair cycle	3245.78		glucocorticoid secretion	0.00557667
positive chemotaxis	3224.61		penile erection	0.00557667
regulation of protein acetylation	3215.54		tongue morphogenesis	0.00557667
positive regulation of blood pressure	3213.37		branching morphogenesis of a nerve	0.00557667
branching involved in mammary gland duct morphogenesis	3208.12		positive regulation of B cell receptor signaling pathway	0.00557667
mammary gland duct morphogenesis	3208.12		elastin metabolic process	0.00557667
mammary gland morphogenesis	3208.12		vagina development	0.00557667
regulation of phospholipase A2 activity	3201.94		regulation of uterine smooth muscle contraction	0.00557667
negative regulation of reactive oxygen species metabolic process	3199.57		response to interleukin-9	0.00557667
regulation of CD4-positive, alpha-beta T cell activation	3195.28		cellular response to testosterone stimulus	0.00557667
negative regulation of tumor necrosis factor production	3185.68		positive regulation of protein kinase C signaling	0.00557667
arachidonic acid secretion	3182.56		cellular response to aldehyde	0.00557667
arachidonate transport	3182.56		hydrocarbon metabolic process	0.00557667
neurotransmitter biosynthetic process	3168.91		regulation of histone deacetylase activity	0.00557667
neurotransmitter metabolic process	3168.91		positive regulation of oxidative phosphorylation	0.00557667
positive regulation of JNK cascade	3166.33		regulation of PERK-mediated unfolded protein response	0.00557667
regulation of antigen receptor-mediated signaling pathway	3139.49		kidney development	0.00561949
regulation of response to food	3131.95		CD4-positive, alpha-beta T cell differentiation involved in immune response	0.00564163
negative regulation of purine nucleotide metabolic process	3131.95		defense response to Gram-positive bacterium	0.00573583
thymus development	3129.49		regulation of interleukin-4 production	0.00582183
mammary gland alveolus development	3122.47		mammary gland duct morphogenesis	0.00582183
mammary gland lobule development	3122.47		adrenergic receptor signaling pathway	0.00582183
regulation of autophagy of mitochondrion	3108.41		neurotransmitter reuptake	0.00582183
tr1491.70915a development	3103.2		negative regulation of cell junction assembly	0.00582183
positive regulation of muscle cell apoptotic process	3101.43		regulation of endoplasmic reticulum stress-induced intrinsic apoptotic signaling pathway	0.00582183
regulation of superoxide metabolic process	3098.22		detection of external stimulus	0.0058562
female gonad development	3098.16		alpha-beta T cell activation involved in immune response	0.00597083
development of primary female sexual characteristics	3098.16		alpha-beta T cell differentiation involved in immune response	0.00597083
visual learning	3087.32		regulation of CD4-positive, alpha-beta T cell activation	0.00597083
visual behavior	3087.32		female gonad development	0.0059825
associative learning	3087.32		megakaryocyte differentiation	0.0059825
positive regulation of endothelial cell chemotaxis	3082.94		positive regulation of endocytosis	0.0059825
fever generation	3076.38		regulation of calcium-mediated signaling	0.0059825
heat generation	3076.38		cellular respiration	0.00599851
negative regulation of posttranscriptional gene silencing	3075.14		positive regulation of developmental growth	0.00599851
negative regulation of gene silencing by RNA	3075.14		positive regulation of I-kappaB kinase/NF-kappaB signaling	0.00617131
negative regulation of gene silencing	3075.14		viral life cycle	0.00628302
regulation of blood coagulation	3069.7		negative regulation of mitotic cell cycle	0.00628302
regulation of hemostasis	3069.7		endothelial cell development	0.00631257
regulation of coagulation	3069.7		cholesterol efflux	0.00631257
linoleic acid metabolic process	3063.47		negative regulation of T cell proliferation	0.00631257
nitric oxide mediated signal transduction	3059.86		regulation of alpha-beta T cell differentiation	0.00631257
regulation of alcohol biosynthetic process	3059.43		positive regulation of phosphatidylinositol 3-kinase activity	0.00635038
response to immobilization stress	3053.5		regulation of alpha-beta T cell proliferation	0.00635038
negative regulation of cardiac muscle tissue growth	3052.54		neurotrophin TRK receptor signaling pathway	0.00635038
negative regulation of heart growth	3052.54		olefinic compound biosynthetic process	0.00635038
negative regulation of cardiac muscle tissue development	3052.54		regulation of amyloid-beta formation	0.00635038
prostate gland growth	3050		positive regulation of peptidyl-lysine acetylation	0.00635038
neuromuscular 86.68ction development	3047.28		organophosphate catabolic process	0.00647482
positive regulation of mast cell activation involved in immune response	3044.8		cellular modified amino acid metabolic process	0.00652803
positive regulation of mast cell degranulation	3044.8		negative regulation of cell growth	0.00652803
positive regulation of mast cell activation	3044.8		mesenchyme development	0.00656026
positive regulation of leukocyte degranulation	3044.8		insulin secretion involved in cellular response to glucose stimulus	0.00666705
positive regulation of myeloid leukocyte mediated immunity	3044.8		regulation of microtubule-based process	0.00674156
positive regulation of digestive system process	3034.05		regulation of glomerular filtration	0.00676453
prostaglandin secretion	3032.75		arginine catabolic process	0.00676453
regulation of killing of cells of other organism	3032.75		oligopeptide transport	0.00676453
prostaglandin transport	3032.75		tonic smooth muscle contraction	0.00676453
positive regulation of I-kappaB kinase/NF-kappaB signaling	3026.15		positive regulation of heat generation	0.00676453
negative regulation of potassium ion transport	3021.37		regulation of prostaglandin secretion	0.00676453
cellular response to vitamin	3019.45		positive regulation of intracellular estrogen receptor signaling pathway	0.00676453
T cell mediated cytotoxicity	3019.15		natural killer cell chemotaxis	0.00676453
regulation of sequestering of triglyceride	3013.24		regulation of transcription from RNA polymerase II promoter in response to oxidative stress	0.00676453
sequestering of triglyceride	3013.24		multi-organism membrane organization	0.00676453
epithelial cell morphogenesis	3010.33		regulation of gamma-delta T cell activation	0.00676453
primary alcohol catabolic process	3010.28		positive regulation of lipoprotein lipase activity	0.00676453
response to cold	3005.42		serotonin uptake	0.00676453
myeloid cell apoptotic process	2995.04		positive regulation of killing of cells of other organism	0.00676453
regulation of fatty acid biosynthetic process	2992.29		regulation of dopamine receptor signaling pathway	0.00676453
positive regulation of epidermal growth factor receptor signaling pathway	2979.86		trachea morphogenesis	0.00676453
positive regulation of ERBB signaling pathway	2979.86		prostate glandular acinus development	0.00676453
inflammatory cell apoptotic process	2974.35		cardiac neural crest cell differentiation involved in heart development	0.00676453
204.18403 signaling pathway	2966.26		cardiac neural crest cell development involved in heart development	0.00676453
positive regulation of peptidyl-serine phosphorylation	2966.26		protein auto-ADP-ribosylation	0.00676453
regulation of peptidyl-serine phosphorylation	2966.26		mucus secretion	0.00676453
neurotrophin TRK receptor signaling pathway	2953.97		uterine smooth muscle contraction	0.00676453
neurotrophin signaling pathway	2953.97		histone H4 deacetylation	0.00676453
interleukin-8 production	2948.82		cellular response to iron ion	0.00676453
regulation of angiotensin levels in blood	2948.69		fibroblast growth factor production	0.00676453
angiotensin maturation	2948.69		regulation of fibroblast growth factor production	0.00676453
regulation of humoral immune response	2945.88		transport across blood-brain barrier	0.00676453
behavioral response to cocaine	2934.69		positive regulation of flagellated sperm motility	0.00676453
positive regulation of type 2 immune response	2926.61		positive regulation of cilium-dependent cell motility	0.00676453
regulation of type 2 immune response	2926.61		positive regulation of T-helper 17 type immune response	0.00676453
type 2 immune response	2926.61		regulation of T-helper 2 cell cytokine production	0.00676453
glandular epithelial cell development	2920.45		regulation of pH	0.00676723
regulation of cholesterol biosynthetic process	2901.31		cellular oxidant detoxification	0.00676723
regulation of sterol biosynthetic process	2901.31		positive regulation of myeloid leukocyte mediated immunity	0.00690665
cellular response to UV	2895.31		ribonucleoside monophosphate biosynthetic process	0.00690665
negative regulation of insulin receptor signaling pathway	2892.21		positive regulation of phosphatase activity	0.00690665
negative regulation of cellular response to insulin stimulus	2892.21		negative regulation of macroautophagy	0.00690665
positive regulation of protein export from nucleus	2884.95		response to ATP	0.00690665
ether biosynthetic process	2871.95		xenobiotic transport	0.00690665
mammary gland epithelial cell proliferation	2864.08		embryonic digestive tract development	0.00690665
macrophage differentiation	2863.88		negative regulation of cardiac muscle tissue growth	0.00690665
Leydig cell differentiation	2851.43		negative regulation of heart growth	0.00690665
megakaryocyte differentiation	2848.38		heart trabecula morphogenesis	0.00690665
stem cell development	2839.22		regulation of neuroblast proliferation	0.00690665
brown fat cell differentiation	2827.85		negative regulation of endothelial cell apoptotic process	0.00690665
hydrogen peroxide metabolic process	2823.44		purine ribonucleotide metabolic process	0.00690758
positive regulation of G protein-coupled receptor signaling pathway	2819.24		dendrite morphogenesis	0.00691278
lipoxygenase pathway	2813.51		regulation of heart rate	0.00704408
genitalia morphogenesis	2809.48		positive regulation of cation transmembrane transport	0.00713964
negative regulation of glial cell proliferation	2809.13		negative regulation of neurogenesis	0.0073032
regulation of phosphatidylinositol 3-kinase activity	2795.39		cholesterol transport	0.00732875
positive regulation of phosphatidylinositol 3-kinase activity	2795.39		positive regulation of lymphocyte differentiation	0.00732875
regulation of cysteine-type endopeptidase activity involved in apoptotic signaling pathway	2776.34		development of primary female sexual characteristics	0.00732875
myoblast fusion	2775.16		negative regulation of leukocyte differentiation	0.00732875
regulation of T cell receptor signaling pathway	2763.89		negative regulation of protein serine/threonine kinase activity	0.00737183
vitamin metabolic process	2751.99		regulation of osteoclast differentiation	0.00741505
positive regulation of guanylate cyclase activity	2744.6		ceramide biosynthetic process	0.00741505
regulation of guanylate cyclase activity	2744.6		cellular response to retinoic acid	0.00741505
positive regulation of lyase activity	2744.6		regulation of cytokine production involved in inflammatory response	0.00741505
positive regulation of nucleotide biosynthetic process	2744.6		positive regulation of sprouting angiogenesis	0.00741505
positive regulation of purine nucleotide biosynthetic process	2744.6		regulation of protein localization to membrane	0.00748689
positive regulation of tyrosine phosphorylation of STAT protein	2741.62		protein ADP-ribosylation	0.00749096
positive regulation of epidermal growth factor-activated receptor activity	2739.45		peptide hormone processing	0.00749096
positive regulation of potassium ion transport	2739.45		regulation of vascular endothelial growth factor receptor signaling pathway	0.00749096
regulation of calcium ion transmembrane transporter activity	2734.51		interleukin-4 production	0.00749096
neutral lipid biosynthetic process	2729.25		signaling receptor ligand precursor processing	0.00749096
acylglycerol biosynthetic process	2729.25		positive regulation of cyclin-dependent protein kinase activity	0.00749096
calcium-mediated signaling using intracellular calcium source	2728.28		regulation of histone modification	0.00760943
response to angiotensin	2721.94		neural tube formation	0.00762135
cellular response to angiotensin	2721.94		positive regulation of lymphocyte mediated immunity	0.00762135
response to ischemia	2714.5		muscle cell migration	0.00762135
glucocorticoid biosynthetic process	2710.39		interleukin-1 beta production	0.00762135
glucocorticoid metabolic process	2710.39		positive regulation of chromatin organization	0.00762135
positive regulation of smooth muscle cell migration	2696.01		positive regulation of macroautophagy	0.00780894
adenylate cyclase-activating adrenergic receptor signaling pathway	2693.12		hormone biosynthetic process	0.00780894
adrenergic receptor signaling pathway	2693.12		protein deacylation	0.00792198
positive regulation of cytosolic calcium ion concentration involved in phospholipase C-activating G protein-coupled signaling pathway	2688.73		regulation of angiotensin levels in blood	0.00805627
organophosphate catabolic process	2678.07		angiotensin maturation	0.00805627
epithelial cell differentiation involved in prostate gland development	2676.37		positive regulation of inflammatory response to antigenic stimulus	0.00805627
regulation of presynaptic cytosolic calcium ion concentration	2674.97		regulation of humoral immune response mediated by circulating immunoglobulin	0.00805627
positive regulation of stem cell proliferation	2666.83		positive regulation of cilium movement	0.00805627
eyelid development in camera-type eye	2656.64		ethanol oxidation	0.00805627
negative regulation of calcium ion transmembrane transporter activity	2649.78		vascular transport	0.00805627
negative regulation of calcium ion transmembrane transport	2649.78		pancreatic juice secretion	0.00805627
renal system process involved in regulation of blood volume	2644.93		regulation of prostaglandin biosynthetic process	0.00805627
renal system process involved in regulation of systemic arterial blood pressure	2644.93		response to peptidoglycan	0.00805627
response to hydroperoxide	2641.35		interleukin-18 production	0.00805627
angiotensin-activated signaling pathway	2637.2		histone-serine phosphorylation	0.00805627
regulation of MHC class II biosynthetic process	2620.65		vitamin D biosynthetic process	0.00805627
MHC class II biosynthetic process	2620.65		gamma-delta T cell differentiation	0.00805627
platelet formation	2612.93		adhesion of symbiont to host cell	0.00805627
platelet morphogenesis	2612.93		behavioral response to cocaine	0.00805627
phospholipid translocation	2608.83		ventricular cardiac muscle cell development	0.00805627
lipid translocation	2608.83		branching involved in prostate gland morphogenesis	0.00805627
regulation of membrane lipid distribution	2608.83		regulation of gastric acid secretion	0.00805627
dendritic cell chemotaxis	2608.29		prostate gland growth	0.00805627
monoacylglycerol metabolic process	2592.72		epithelial cell differentiation involved in prostate gland development	0.00805627
megakaryocyte development	2592.24		ectodermal placode formation	0.00805627
positive regulation of endoplasmic reticulum unfolded protein response	2592.24		positive regulation of triglyceride lipase activity	0.00805627
regulation of endoplasmic reticulum unfolded protein response	2592.24		ectodermal placode morphogenesis	0.00805627
regulation of PERK-mediated unfolded protein response	2592.24		macrophage apoptotic process	0.00805627
positive regulation of response to endoplasmic reticulum stress	2592.24		caveolin-mediated endocytosis	0.00805627
PERK-mediated unfolded protein response	2592.24		positive regulation of sphingolipid biosynthetic process	0.00805627
integrated stress response signaling	2592.24		hepatocyte apoptotic process	0.00805627
cyclooxygenase pathway	2583.79		ether biosynthetic process	0.00805627
protein autoprocessing	2583.31		positive regulation of ceramide biosynthetic process	0.00805627
positive regulation of gluconeogenesis	2578.31		morphogenesis of embryonic epithelium	0.00810114
positive regulation of glucose metabolic process	2578.31		epithelial cell morphogenesis	0.00810365
regulation of gluconeogenesis	2578.31		central nervous system neuron axonogenesis	0.00810365
tongue development	2569.96		response to vitamin D	0.00810365
face morphogenesis	2561.62		superoxide anion generation	0.00810365
head morphogenesis	2561.62		positive T cell selection	0.00810365
body morphogenesis	2561.62		positive regulation of epidermal growth factor receptor signaling pathway	0.00810365
copulation	2557.2		alpha-beta T cell proliferation	0.00810365
regulation of Rho protein signal transduction	2555.6		head morphogenesis	0.00810365
regulation of platelet activation	2553.95		quinone metabolic process	0.00810365
neural crest cell development	2548.35		positive regulation of CD4-positive, alpha-beta T cell activation	0.00810365
mesenchymal cell development	2548.35		locomotory behavior	0.00811007
neural crest cell differentiation	2548.35		negative regulation of smooth muscle cell proliferation	0.00821633
oligopeptide transport	2531.53		cellular response to amino acid stimulus	0.00821633
regulation of B cell activation	2526.02		chondrocyte differentiation	0.00823077
histone-serine phosphorylation	2518.45		embryonic organ morphogenesis	0.00844954
regulation of ATP biosynthetic process	2518.04		regulation of G2/M transition of mitotic cell cycle	0.00854626
positive regulation of fatty acid beta-oxidation	2512.33		regulation of cell junction assembly	0.00854626
positive regulation of superoxide anion generation	2505.93		phenol-containing compound metabolic process	0.0085478
regulation of superoxide anion generation	2505.93		regulation of transcription from RNA polymerase II promoter in response to stress	0.0085478
superoxide anion generation	2505.93		purine ribonucleoside monophosphate metabolic process	0.008745
negative regulation of action potential	2497.08		respiratory burst	0.008745
regulation of transcription from RNA polymerase II promoter in response to stress	2496.04		negative regulation of gene silencing	0.008745
regulation of DNA-templated transcription in response to stress	2496.04		positive regulation of cell migration involved in sprouting angiogenesis	0.008745
negative regulation of pri-miRNA transcription by RNA polymerase II	2491.63		pattern recognition receptor signaling pathway	0.00877071
cellular extravasation	2486.55		negative regulation of cell cycle process	0.00886753
regulation of icosanoid secretion	2478.81		positive regulation of proteasomal protein catabolic process	0.00887319
regulation of fatty acid transport	2478.81		regulation of lymphocyte mediated immunity	0.008881
diol biosynthetic process	2470.01		neural precursor cell proliferation	0.008881
diol metabolic process	2470.01		ribonucleotide metabolic process	0.00896753
amyloid-beta clearance	2460.69		negative regulation of organelle organization	0.00896753
positive regulation of prostaglandin secretion	2458.12		T cell differentiation involved in immune response	0.00907239
regulation of prostaglandin secretion	2458.12		positive regulation of tyrosine phosphorylation of STAT protein	0.00907239
positive regulation of icosanoid secretion	2458.12		amyloid precursor protein metabolic process	0.00907239
positive regulation of fatty acid transport	2458.12		molting cycle	0.00920705
fructose metabolic process	2429.13		hair cycle	0.00920705
defense response to Gram-negative bacterium	2427.83		macromolecule deacylation	0.00920705
positive regulation of metallopeptidase activity	2427.38		protein acetylation	0.00923258
tr1491.70915a morphogenesis	2427.38		organelle fission	0.00926969
cardiac neural crest cell differentiation involved in heart development	2427.38		positive regulation of muscle cell apoptotic process	0.00941529
cardiac neural crest cell development involved in heart development	2427.38		T cell homeostasis	0.00941529
caveolin-mediated endocytosis	2427.38		positive regulation of blood pressure	0.00941529
regulation of Golgi organization	2427.38		insulin-like growth factor receptor signaling pathway	0.00941529
regulation of early endosome to late endosome transport	2427.38		cellular response to estradiol stimulus	0.00941529
thyroid gland development	2427.38		positive regulation of ERBB signaling pathway	0.00941529
regulation of alpha-beta T cell differentiation	2414.54		positive regulation of response to endoplasmic reticulum stress	0.00941529
negative regulation of cold-induced thermogenesis	2401.22		negative regulation of B cell apoptotic process	0.00944937
white fat cell differentiation	2399.32		positive regulation of systemic arterial blood pressure	0.00944937
regulation of transcription involved in cell fate commitment	2399.32		negative regulation of platelet-derived growth factor receptor signaling pathway	0.00944937
negative regulation of collagen biosynthetic process	2399.32		regulation of skeletal muscle satellite cell proliferation	0.00944937
negative regulation of collagen metabolic process	2399.32		regulation of heat generation	0.00944937
negative regulation of gene silencing by miRNA	2399.32		negative regulation of protein autophosphorylation	0.00944937
regulation of thymocyte apoptotic process	2393.84		positive regulation of synaptic transmission, GABAergic	0.00944937
thymocyte apoptotic process	2393.84		regulation of phospholipase A2 activity	0.00944937
negative regulation of reactive oxygen species biosynthetic process	2361.89		positive regulation of T cell differentiation in thymus	0.00944937
regulation of cellular extravasation	2356.04		regulation of histone phosphorylation	0.00944937
negative regulation of cell growth involved in cardiac muscle cell development	2354.21		positive regulation of intracellular steroid hormone receptor signaling pathway	0.00944937
positive regulation of positive chemotaxis	2340.96		interleukin-15-mediated signaling pathway	0.00944937
regulation of positive chemotaxis	2340.96		histone H3-K9 acetylation	0.00944937
positive regulation of systemic arterial blood pressure	2333.37		positive regulation of epidermal growth factor-activated receptor activity	0.00944937
negative regulation of nitric oxide biosynthetic process	2325.66		regulation of pinocytosis	0.00944937
negative regulation of nitric oxide metabolic process	2325.66		negative regulation of nitric-oxide synthase activity	0.00944937
cellular response to testosterone stimulus	2303.49		negative regulation of cytosolic calcium ion concentration	0.00944937
androgen receptor signaling pathway	2303.25		negative regulation of amino acid transport	0.00944937
phospholipid catabolic process	2302.48		regulation of growth hormone secretion	0.00944937
positive regulation of receptor internalization	2301.98		positive regulation of digestive system process	0.00944937
positive regulation of receptor-mediated endocytosis	2301.98		negative regulation of cell growth involved in cardiac muscle cell development	0.00944937
signal transduction in absence of ligand	2301.57		cellular response to interleukin-15	0.00944937
extrinsic apoptotic signaling pathway in absence of ligand	2301.57		ectodermal placode development	0.00944937
regulation of release of sequestered calcium ion into cytosol	2298.38		regulation of tau-protein kinase activity	0.00944937
regulation of epidermis development	2293.45		regulation of leukocyte tethering or rolling	0.00944937
response to hyperoxia	2285.48		ribonucleoside metabolic process	0.00952139
response to increased oxygen levels	2285.48		nucleoside monophosphate metabolic process	0.00952139
signal transduction involved in regulation of gene expression	2283.23		pigment metabolic process	0.00952139
dopamine metabolic process	2282.12		regulation of cartilage development	0.00952139
regulation of transcription from RNA polymerase II promoter in response to oxidative stress	2278.85		demethylation	0.00952139
positive regulation of vascular endothelial growth factor production	2278.68		positive regulation of calcium ion transmembrane transport	0.00952139
regulation of vascular endothelial growth factor production	2278.68		regulation of DNA replication	0.00954947
vascular endothelial growth factor production	2278.68		actin filament bundle assembly	0.00971322
multi-organism membrane organization	2272.24		stimulatory C-type lectin receptor signaling pathway	0.00990056
macrophage apoptotic process	2272.24		regulation of T cell mediated immunity	0.0099846
multi-organism cellular process	2272.24		lymphocyte mediated immunity	0.010068
T cell 617.376ction	2254.55		DNA replication initiation	0.0101148
negative regulation of peptidyl-tyrosine phosphorylation	2253.32		porphyrin-containing compound metabolic process	0.0101148
response to interleukin-1	2245.12		nucleoside biosynthetic process	0.0101148
regulation of homotypic cell-cell adhesion	2239.21		regulation of intracellular estrogen receptor signaling pathway	0.0101148
positive T cell 617.376ction	2233.85		amyloid-beta formation	0.0101148
gastric acid secretion	2232.62		neurotrophin signaling pathway	0.0101148
calcium ion import across plasma membrane	2232.62		type 2 immune response	0.0101148
calcium ion import into cytosol	2232.62		guanosine-containing compound metabolic process	0.0101148
regulation of tumor necrosis factor-mediated signaling pathway	2228.72		ATP metabolic process	0.0101187
regulation of transcription involved in G1/S transition of mitotic cell cycle	2219.97		response to transforming growth factor beta	0.0101922
regulation of gastric acid secretion	2196.38		fatty acid catabolic process	0.0102604
regulation of plasma membrane organization	2195.88		regulation of ubiquitin-dependent protein catabolic process	0.010298
positive regulation of chemokine production	2183.57		fatty acid beta-oxidation	0.0104622
regulation of chemokine production	2183.57		positive regulation of type I interferon production	0.0104622
chemokine production	2183.57		regulation of DNA-templated transcription in response to stress	0.0106291
cellular response to prostaglandin stimulus	2174.93		positive regulation of neurogenesis	0.010644
response to prostaglandin	2174.93		regulation of cellular protein catabolic process	0.010644
negative regulation of nitric-oxide synthase activity	2169.73		regulation of cell cycle phase transition	0.010806
negative regulation of monooxygenase activity	2169.73		C21-steroid hormone metabolic process	0.0108437
positive regulation of cellular extravasation	2163.69		purine nucleoside monophosphate metabolic process	0.0108437
positive regulation of cation transmembrane transport	2160.95		positive regulation of organic acid transport	0.0108437
regulation of triglyceride metabolic process	2158.86		dopamine metabolic process	0.0108437
lipid phosphorylation	2152.61		regulation of oligodendrocyte differentiation	0.0108437
tetrahydrofolate metabolic process	2135.24		positive regulation of release of sequestered calcium ion into cytosol	0.0108437
platelet aggregation	2128.67		regulation of amyloid precursor protein catabolic process	0.0108437
regulation of histone phosphorylation	2127.91		negative regulation of reactive oxygen species biosynthetic process	0.0108437
interaction with symbiont	2111.3		actin filament bundle organization	0.0109074
regulation of glomerular filtration	2106.53		establishment or maintenance of transmembrane electrochemical gradient	0.0109414
striated muscle contraction	2090.56		regulation of cGMP-mediated signaling	0.0109414
regulation of phospholipid biosynthetic process	2087.96		regulation of sequestering of triglyceride	0.0109414
adipose tissue development	2083.42		skeletal muscle satellite cell proliferation	0.0109414
positive regulation of neural precursor cell proliferation	2078.23		regulation of skeletal muscle cell proliferation	0.0109414
regulation of phagocytosis, engulfment	2077.84		corticosteroid receptor signaling pathway	0.0109414
regulation of membrane invagination	2077.84		genitalia morphogenesis	0.0109414
positive regulation of calcium ion transmembrane transport	2076.22		regulation of peroxisome proliferator activated receptor signaling pathway	0.0109414
cardiac muscle contraction	2069.87		positive regulation of urine volume	0.0109414
regulation of multi-organism process	2065.08		positive regulation of renal sodium excretion	0.0109414
intestinal absorption	2062.15		angiotensin-activated signaling pathway	0.0109414
positive regulation of fatty acid biosynthetic process	2053.43		nucleotide salvage	0.0109414
positive regulation of lipoprotein lipase activity	2053.43		negative regulation by host of viral transcription	0.0109414
pancreatic juice secretion	2053.43		positive thymic T cell selection	0.0109414
positive regulation of triglyceride lipase activity	2053.43		response to ether	0.0109414
regulation of pinocytosis	2053.43		GMP metabolic process	0.0109414
positive regulation of triglyceride biosynthetic process	2053.43		sphingosine biosynthetic process	0.0109414
anatomical structure regression	2042		sphingoid biosynthetic process	0.0109414
regulation of endocrine process	2021.87		white fat cell differentiation	0.0109414
cellular response to thyroid hormone stimulus	2008.25		response to interleukin-15	0.0109414
cell proliferation in hindbrain	2006.79		cellular response to antibiotic	0.0109414
cellular response to antibiotic	1991.95		neutrophil extravasation	0.0109414
regulation of myeloid cell apoptotic process	1990.92		trans-synaptic signaling, modulating synaptic transmission	0.0109414
regulation of stress fiber assembly	1985.99		guanosine-containing compound biosynthetic process	0.0109414
regulation of actomyosin structure organization	1985.99		negative regulation of voltage-gated calcium channel activity	0.0109414
regulation of actin filament bundle assembly	1985.99		negative regulation of pri-miRNA transcription by RNA polymerase II	0.0109414
contractile actin filament bundle assembly	1985.99		regulation of unsaturated fatty acid biosynthetic process	0.0109414
stress fiber assembly	1985.99		signal transduction in absence of ligand	0.0109543
actin filament bundle assembly	1985.99		extrinsic apoptotic signaling pathway in absence of ligand	0.0109543
actin filament bundle organization	1985.99		innate immune response activating cell surface receptor signaling pathway	0.0110068
regulation of cardiac muscle contraction	1985.13		regulation of protein ubiquitination	0.0112596
cellular response to prostaglandin E stimulus	1982.58		response to interleukin-1	0.0112596
response to prostaglandin E	1982.58		regulation of supramolecular fiber organization	0.0113887
endothelial cell development	1982.29		innate immune response-activating signal transduction	0.0113936
positive regulation of collagen biosynthetic process	1978.84		lymphocyte migration	0.0113936
positive regulation of collagen metabolic process	1978.84		cellular response to acid chemical	0.0114611
response to muscle stretch	1975.67		negative regulation of potassium ion transport	0.0116023
regulation of cerebellar granule cell precursor proliferation	1970.56		regulation of protein export from nucleus	0.0116023
cell proliferation in external granule layer	1970.56		defense response to fungus	0.0116023
cerebellar granule cell precursor proliferation	1970.56		negative regulation of oxidoreductase activity	0.0116023
regulation of ceramide biosynthetic process	1962.45		response to dexamethasone	0.0116023
regulation of sphingolipid biosynthetic process	1962.45		negative regulation of extrinsic apoptotic signaling pathway via death domain receptors	0.0116023
regulation of membrane lipid metabolic process	1962.45		establishment of organelle localization	0.011659
grooming behavior	1954.78		carbohydrate biosynthetic process	0.0118131
embryo implantation	1948.69		regulation of blood vessel endothelial cell migration	0.0118688
sphingosine-1-phosphate receptor signaling pathway	1913.95		actin filament organization	0.0120347
sphingolipid mediated signaling pathway	1913.95		regulation of NIK/NF-kappaB signaling	0.0121947
negative regulation of myeloid cell apoptotic process	1906.18		humoral immune response	0.0122002
retrograde trans-synaptic signaling	1903.59		neurotransmitter uptake	0.0123907
Sertoli cell development	1897.28		membrane protein ectodomain proteolysis	0.0123907
Sertoli cell differentiation	1897.28		positive regulation of glucose metabolic process	0.0123907
negative regulation of cell junction assembly	1889.24		response to electrical stimulus	0.0123907
positive regulation of brown fat cell differentiation	1888.99		response to interleukin-7	0.0123907
central nervous system neuron axonogenesis	1886.04		cellular response to interleukin-7	0.0123907
purine ribonucleoside monophosphate biosynthetic process	1884.08		SMAD protein signal transduction	0.0125195
purine nucleoside monophosphate biosynthetic process	1884.08		fructose metabolic process	0.0125298
purine nucleoside biosynthetic process	1884.08		positive regulation of triglyceride biosynthetic process	0.0125298
ribonucleoside biosynthetic process	1884.08		skeletal muscle cell proliferation	0.0125298
purine ribonucleoside biosynthetic process	1884.08		cell proliferation in external granule layer	0.0125298
ribonucleoside monophosphate biosynthetic process	1884.08		cerebellar granule cell precursor proliferation	0.0125298
purine ribonucleoside monophosphate metabolic process	1884.08		secretory granule localization	0.0125298
nucleoside biosynthetic process	1884.08		phosphatidylcholine catabolic process	0.0125298
purine nucleoside monophosphate metabolic process	1884.08		T-helper 2 cell cytokine production	0.0125298
glycosyl compound biosynthetic process	1884.08		sodium ion export across plasma membrane	0.0125298
ribonucleoside monophosphate metabolic process	1884.08		fat-soluble vitamin biosynthetic process	0.0125298
mucus secretion	1879.7		purine-containing compound salvage	0.0125298
sphingosine biosynthetic process	1877.72		negative regulation of DNA damage response, signal transduction by p53 class mediator	0.0125298
sphingoid biosynthetic process	1877.72		adhesion of symbiont to host	0.0125298
sphingosine metabolic process	1877.72		regulation of MHC class II biosynthetic process	0.0125298
sphingoid metabolic process	1877.72		positive regulation of T cell receptor signaling pathway	0.0125298
negative regulation of blood coagulation	1871.46		Sertoli cell development	0.0125298
negative regulation of hemostasis	1871.46		regulation of phagocytosis, engulfment	0.0125298
negative regulation of coagulation	1871.46		prepulse inhibition	0.0125298
positive regulation of production of molecular mediator of immune response	1868.26		negative regulation of glial cell proliferation	0.0125298
positive regulation of blood coagulation	1865.87		negative regulation of androgen receptor signaling pathway	0.0125298
positive regulation of hemostasis	1865.87		cellular hyperosmotic response	0.0125298
positive regulation of coagulation	1865.87		presynaptic modulation of chemical synaptic transmission	0.0125298
negative regulation of epithelial cell differentiation	1845.47		regulation of endothelial cell development	0.0125298
neutrophil mediated cytotoxicity	1832.51		regulation of establishment of endothelial barrier	0.0125298
killing by host of symbiont cells	1832.51		regulation of corticosteroid hormone secretion	0.0125298
killing of cells in other organism involved in symbiotic interaction	1832.51		positive regulation of endothelial cell chemotaxis	0.0125298
amyloid precursor protein metabolic process	1818.27		sensory organ morphogenesis	0.0128629
regulation of type I interferon production	1800.2		regulation of cell cycle G2/M phase transition	0.0129788
type I interferon production	1800.2		regulation of glucose metabolic process	0.0130332
GMP metabolic process	1799.35		purine ribonucleoside triphosphate metabolic process	0.0130713
guanosine-containing compound biosynthetic process	1799.35		negative regulation of MAP kinase activity	0.0130713
tight 86.68ction organization	1796.37		negative regulation of lymphocyte proliferation	0.0130713
regulation of vascular endothelial growth factor receptor signaling pathway	1774.34		regulation of cellular response to heat	0.0130713
regulation of adenylate cyclase-activating G protein-coupled receptor signaling pathway	1769.34		negative regulation of adaptive immune response based on somatic recombination of immune receptors built from immunoglobulin superfamily domains	0.0132091
regulation of cAMP-mediated signaling	1769.34		androgen receptor signaling pathway	0.0132091
regulation of calcium ion import	1763.88		response to copper ion	0.0132091
cellular component maintenance	1748.66		cellular response to epidermal growth factor stimulus	0.0132091
regulation of neurotransmitter uptake	1748.64		regulation of triglyceride metabolic process	0.0132091
B cell proliferation	1735.93		regulation of response to reactive oxygen species	0.0132091
[truncated: 268 more rows]

## Sheet: Sheet3
SYMBOL
ADORA2A
CDK1
CES1
JAK2
LRRK2
TNKS
CA2
P2RX7
HRH3
HRH4
EGFR
NR3C2
NR3C1
JAK3
HMOX1
KDR
TRPV1
ALOX5
TSPO
AR
IDO1
ADORA2B
AKR1B1
JAK1
MAPK1
CA4
MAPK10
ADORA1
PTGS1
MTNR1B
MTNR1A
DRD2
PTPN1
CA1
SLC6A4
CCNB1
PARP1
OPRM1
BRD2
GSK3B
ADORA3
MAPK8
PPARA
TYMS
HCRTR1
IMPDH2
ACHE
PPARG
EPHX2
PTK2
TRPA1
TYK2
PIM3
STK3
IGF1R
MDM2
CNR2
NTRK1
HTR2A
NR1I2
CCR5
NR1H3
CYP2C19
FAAH
HSD11B1
CYP11B1
ESR2
HMGCR
CTSB
CTSL
FABP1
MAPK14
ADRA2A
PTPN2
ESR1
RORC
PPARD
TOP1
FABP4
SPHK1
SCD
SPHK2
PTPN6
SREBF2
FABP5
ELANE
AURKA
ALDH2
EPHX1
CNR1
F2
PRSS1
MET
NR1H2
IDH1
ACP1
CD81
G6PD
PLA2G1B
AKR1B10
MGLL
CXCR3
PLA2G7
PDGFRA
PDGFRB
TGFBR1
RBP4
TERT
CTSD
RARB
PTGES
PLA2G4A
RARG
ICAM1
SELE
CXCR2
ALOX15
617.376
CCR8
PTPN11
GPBAR1
DHFR
GPR55
NOS2
RXRA
MAPK3
HSD11B2
RXRB
GLI1
ALDH1A1
PTGER2
CHRNB2
MAPK9
CYP2A6
F2R
IKBKB
PTPRC
HPRT1
ATP12A
CYP1A2
FADS1
MMP9
TACR1
BRAF
MMP1
MMP2
PLAU
ERBB2
PTGER4
PTGIR
ROCK2
PTGFR
HSP90AA1
VDR
TBXAS1
CYP2C9
CHRNA7
MPO
SMARCA4
PRKCA
CA9
PIK3CG
JUN
ABCC1
PTGDR2
KAT2B
PIK3CA
PRKCQ
ATP4A
POLA1
PRKCD
RASGRP1
IL6ST
F2RL3
CASR
EDNRA
PIK3CB
HDAC2
HDAC1
ADA
NOS1
PRKCB
KCNMA1
LTB4R
CTRC
ABCG2
RPS6KB1
CCND1
NLRP3
HIF1A
CDK4
CYP2D6
CYP3A4
FLT4
TOP2A
C5AR1
S1PR1
HRH2
TACR2
FYN
CTSG
VCAM1
EGLN3
TLR9
MIF
CHUK
CRHR1
CASP3
CASP7
SYK

## Sheet: Sheet2
Description	geneID																																										61.314
cellular calcium ion homeostasis	192.349	2535.92	158.118	928.936	878.49	228.583	290.864	617.376	1268.11	751.336	311.56	938.859	84.7329	84.7329	880.001	704.056	2437.42	1373.54	84.7329	2196.38	1270.78	329.771	1794.97	36.234	36.234	84.7329	1529.18	592.296	36.234	84.7329	192.349	617.376	1663.91	938.859	1665.86	801.437	105.429	113.511	192.349	61.314	617.376	2401.19	32112.2
regulation of inflammatory response	574.629	240.418	1460.46	192.349	2535.92	0	938.859	20.6961	928.936	36.234	878.49	84.7329	617.376	2196.14	290.864	2400.5	1888.99	2088.94	938.859	84.7329	617.376	2531.53	1552.77	880.001	938.859	86.68	1794.97	938.859	2085.24	84.7329	724.752	3267.22	938.859	1289.73	801.437	1215.76	775.545	105.429					39027.9
regulation of MAP kinase activity	204.184	2535.92	20.6961	928.936	20.6961	84.7329	84.7329	290.864	2400.5	1888.99	1653.38	311.56	538.395	1316.14	2531.53	1888.99	204.184	2437.42	704.056	702.109	84.7329	3034.49	1270.78	1794.97	36.234	2085.24	944.474	1888.99	1653.38	801.437	20.6961	938.859	1279.9	801.437	105.429	1023.59	113.511						38626.2
positive regulation of protein serine/threonine kinase activity	204.184	36.234	2535.92	20.6961	928.936	20.6961	84.7329	290.864	2400.5	1888.99	1653.38	311.56	538.395	2531.53	1888.99	204.184	2437.42	704.056	702.109	84.7329	3034.49	1270.78	1589.51	1794.97	36.234	2085.24	944.474	1888.99	1653.38	801.437	20.6961	1279.9	801.437	105.429	1350.6	113.511							38239.2
rhythmic process	574.629	1460.46	1592.47	2400.5	1556.98	86.68	938.859	938.859	20.6961	1552.77	325.151	1542.94	36.234	704.056	1568.82	3034.49	84.7329	1579.18	938.859	84.7329	36.234	1794.97	84.7329	3267.22	1888.99	1508.48	327.344	1663.91	1279.9	86.68	192.349	1215.76	1665.86	1665.86									37700.4
cellular response to chemical stress	109.813	240.418	1460.46	2535.92	0	2242.62	204.184	36.234	84.7329	2196.14	2400.5	1556.98	862.952	86.68	20.6961	1579.18	538.395	2531.53	20.6961	1888.99	325.151	0	1316.14	704.056	592.296	704.056	3034.49	84.7329	938.859	36.234	1888.99	801.437	2133.31	2081.34	959.555								36197.8
positive regulation of MAP kinase activity	204.184	2535.92	20.6961	928.936	20.6961	84.7329	290.864	2400.5	1888.99	1653.38	311.56	538.395	2531.53	1888.99	204.184	2437.42	704.056	702.109	84.7329	3034.49	1270.78	1794.97	36.234	2085.24	944.474	1888.99	1653.38	801.437	20.6961	1279.9	801.437	105.429	113.511										35262.8
activation of protein kinase activity	204.184	84.7329	2535.92	84.7329	290.864	2400.5	1888.99	1653.38	311.56	538.395	2531.53	1888.99	2437.42	702.109	84.7329	3034.49	1794.97	36.234	2085.24	944.474	1888.99	1653.38	801.437	20.6961	1663.91	1279.9	801.437	1350.6	113.511														35107.3
response to nutrient levels	109.813	617.376	1460.46	36.234	0	2242.62	158.118	1592.47	2400.5	1556.98	86.68	538.395	2531.53	1552.77	1888.99	84.7329	45.7761	1316.14	1542.94	880.001	2196.38	938.859	1579.18	84.7329	538.395	2508.56	249.96	801.437	1279.9	2133.31	938.859	1023.59											34915.7
circadian rhythm	574.629	1460.46	1592.47	2400.5	1556.98	86.68	938.859	1552.77	325.151	1542.94	36.234	1568.82	3034.49	84.7329	938.859	84.7329	36.234	1794.97	84.7329	3267.22	1888.99	1508.48	327.344	1663.91	1279.9	192.349	1215.76	1665.86	1665.86														34370.9
response to metal ion	617.376	240.418	204.184	36.234	0	2242.62	36.234	2400.5	1556.98	86.68	20.6961	1579.18	538.395	675.817	617.376	2531.53	20.6961	1888.99	84.7329	325.151	1316.14	36.234	2437.42	276.898	3034.49	1589.51	938.859	675.817	2444.85	1663.91	801.437	2133.31	84.7329	1084.36									34221.8
response to drug	617.376	574.629	1460.46	36.234	0	1592.47	1268.11	2400.5	20.6961	20.6961	1316.14	1542.94	36.234	36.234	2437.42	1373.54	276.898	36.234	3034.49	84.7329	120.967	86.68	938.859	1270.78	1589.51	105.429	84.7329	538.395	3267.22	84.7329	0	36.234	1663.91	1279.9	315.944	2133.31	1179.28						32861.9
regulation of peptide secretion	574.629	192.349	2535.92	20.6961	20.6961	36.234	2196.14	2400.5	837.671	1653.38	311.56	84.7329	880.001	2437.42	938.859	105.429	1579.18	1794.97	1364.63	944.474	3267.22	1491.71	20.6961	1663.91	1215.76	1665.86	698.331	801.437	1023.59														32758
response to oxidative stress	109.813	240.418	2535.92	0	2242.62	204.184	36.234	84.7329	1761.93	2196.14	2400.5	1556.98	862.952	86.68	20.6961	1579.18	538.395	2531.53	20.6961	1888.99	325.151	0	1316.14	704.056	592.296	1373.54	704.056	3034.49	817.176	84.7329	84.7329	938.859	36.234	801.437	959.555								32671
second-messenger-mediated signaling	574.629	192.349	25.08	617.376	290.864	2400.5	617.376	1268.11	751.336	2219.99	2531.53	20.6961	880.001	2437.42	1568.82	105.429	1579.18	329.771	2085.24	84.7329	36.234	944.474	86.68	3267.22	84.7329	938.859	192.349	1289.73	617.376	20.6961	1663.91	1665.86	192.349	617.376									32198.3
calcium ion homeostasis	192.349	2535.92	158.118	928.936	878.49	228.583	290.864	617.376	1268.11	751.336	311.56	938.859	84.7329	84.7329	880.001	704.056	2437.42	1373.54	84.7329	2196.38	1270.78	329.771	1794.97	36.234	36.234	84.7329	1529.18	592.296	36.234	84.7329	192.349	617.376	1663.91	938.859	1665.86	801.437	105.429	113.511	192.349	61.314	617.376	2401.19	32112.2
cellular divalent inorganic cation homeostasis	192.349	2535.92	158.118	928.936	878.49	228.583	290.864	617.376	1268.11	751.336	311.56	938.859	84.7329	84.7329	880.001	704.056	2437.42	1373.54	84.7329	2196.38	1270.78	329.771	1794.97	36.234	36.234	84.7329	1529.18	592.296	36.234	84.7329	192.349	617.376	1663.91	938.859	1665.86	801.437	105.429	113.511	192.349	61.314	617.376	2401.19	32112.2
protein secretion	574.629	192.349	2535.92	20.6961	36.234	20.6961	36.234	2196.14	2400.5	837.671	1653.38	311.56	84.7329	880.001	2437.42	938.859	105.429	1579.18	1364.63	944.474	3267.22	36.234	1491.71	20.6961	1663.91	938.859	1215.76	1665.86	698.331	801.437	1023.59												31974.3
establishment of protein localization to extracellular region	574.629	192.349	2535.92	20.6961	36.234	20.6961	36.234	2196.14	2400.5	837.671	1653.38	311.56	84.7329	880.001	2437.42	938.859	105.429	1579.18	1364.63	944.474	3267.22	36.234	1491.71	20.6961	1663.91	938.859	1215.76	1665.86	698.331	801.437	1023.59												31974.3
protein localization to extracellular region	574.629	192.349	2535.92	20.6961	36.234	20.6961	36.234	2196.14	2400.5	837.671	1653.38	311.56	84.7329	880.001	2437.42	938.859	105.429	1579.18	1364.63	944.474	3267.22	36.234	1491.71	20.6961	1663.91	938.859	1215.76	1665.86	698.331	801.437	1023.59												31974.3
regulation of trans-synaptic signaling	2535.92	0	1592.47	2400.5	311.56	2531.53	1888.99	880.001	1568.82	1270.78	1794.97	2085.24	36.234	3267.22	36.234	2444.85	36.234	84.7329	1289.73	1491.71	327.344	1663.91	1279.9	113.511	938.859																		31871.3
regulation of lipid metabolic process	1460.46	0	158.118	878.49	84.7329	837.671	0	938.859	1552.77	880.001	36.234	704.056	704.056	938.859	817.176	1387.28	1270.78	1794.97	944.474	1402.82	565.226	938.859	938.859	801.437	249.96	938.859	1215.76	2923.61	2133.31	938.859	105.429	1023.59	959.555	938.859									31464
peptidyl-tyrosine phosphorylation	617.376	2535.92	938.859	20.6961	84.7329	290.864	2400.5	862.952	1653.38	1364.63	538.395	1316.14	2219.99	84.7329	204.184	2272.87	704.056	1943.62	704.056	84.7329	36.234	1387.28	1270.78	1794.97	944.474	36.234	1653.38	801.437	20.6961	938.859	1279.9												31006.9
peptidyl-tyrosine modification	617.376	2535.92	938.859	20.6961	84.7329	290.864	2400.5	862.952	1653.38	1364.63	538.395	1316.14	2219.99	84.7329	204.184	2272.87	704.056	1943.62	704.056	84.7329	36.234	1387.28	1270.78	1794.97	944.474	36.234	1653.38	801.437	20.6961	938.859	1279.9												31006.9
regulation of protein secretion	574.629	192.349	2535.92	20.6961	20.6961	36.234	2196.14	2400.5	837.671	1653.38	311.56	84.7329	880.001	2437.42	938.859	105.429	1579.18	1364.63	944.474	3267.22	1491.71	20.6961	1663.91	1215.76	1665.86	698.331	801.437	1023.59															30963
modulation of chemical synaptic transmission	2535.92	0	1592.47	2400.5	311.56	2531.53	1888.99	880.001	1568.82	1270.78	1794.97	2085.24	36.234	3267.22	36.234	2444.85	36.234	84.7329	1289.73	1491.71	327.344	1663.91	1279.9	113.511																			30932.4
positive regulation of protein transport	192.349	2535.92	0	20.6961	36.234	84.7329	2400.5	1556.98	1888.99	837.671	0	1888.99	84.7329	204.184	1316.14	2437.42	1568.82	3034.49	938.859	3267.22	36.234	801.437	1491.71	20.6961	1663.91	698.331	801.437	938.859															30747.5
positive regulation of establishment of protein localization	192.349	2535.92	0	20.6961	36.234	84.7329	2400.5	1556.98	1888.99	837.671	0	1888.99	84.7329	204.184	1316.14	2437.42	1568.82	3034.49	938.859	3267.22	36.234	801.437	1491.71	20.6961	1663.91	698.331	801.437	938.859															30747.5
regulation of cytosolic calcium ion concentration	192.349	2535.92	878.49	228.583	290.864	617.376	1268.11	751.336	311.56	938.859	84.7329	880.001	704.056	2437.42	1373.54	84.7329	2196.38	1270.78	329.771	1794.97	36.234	36.234	84.7329	1529.18	592.296	36.234	192.349	617.376	1663.91	938.859	1665.86	801.437	105.429	192.349	617.376	2401.19							30680.9
response to steroid hormone	617.376	36.234	2535.92	0	2400.5	2303.49	1579.18	938.859	20.6961	1552.77	1316.14	1542.94	1031.73	938.859	817.176	84.7329	329.771	538.395	565.226	2444.85	538.395	2339.73	107.376	1215.76	2133.31	2111.14																	30040.6
positive regulation of secretion	192.349	2535.92	20.6961	1592.47	36.234	2400.5	837.671	1653.38	84.7329	880.001	2437.42	2196.38	938.859	1794.97	2085.24	3267.22	36.234	1491.71	327.344	20.6961	1663.91	938.859	698.331	801.437																			28932.6
regulation of small molecule metabolic process	574.629	1460.46	0	938.859	158.118	36.234	837.671	1579.18	938.859	1552.77	880.001	2437.42	1568.82	938.859	1270.78	2085.24	84.7329	1402.82	938.859	938.859	86.68	1215.76	2923.61	938.859	1023.59	959.555	938.859																28710.1
cellular response to oxidative stress	109.813	240.418	2535.92	2242.62	204.184	36.234	84.7329	2196.14	2400.5	1556.98	862.952	86.68	20.6961	1579.18	538.395	2531.53	1888.99	325.151	0	1316.14	704.056	592.296	704.056	3034.49	84.7329	938.859	36.234	801.437	959.555														28613
fatty acid metabolic process	1460.46	0	20.6961	1761.93	2196.14	1888.99	837.671	538.395	617.376	1552.77	928.936	880.001	36.234	276.898	36.234	938.859	120.967	675.817	1402.82	146.047	675.817	1141.36	938.859	249.96	1215.76	315.944	2923.61	775.545	801.437	1179.28	959.555	938.859											28433.2
muscle cell proliferation	240.418	1460.46	2535.92	0	2242.62	928.936	204.184	2400.5	1888.99	86.68	675.817	1888.99	1316.14	704.056	702.109	3034.49	378.086	938.859	1589.51	36.234	565.226	192.349	698.331	2081.34	1023.59																		27813.8
response to molecule of bacterial origin	109.813	617.376	574.629	25.08	192.349	2535.92	0	20.6961	928.936	36.234	20.6961	617.376	1556.98	1268.11	1888.99	20.6961	2088.94	311.56	538.395	20.6961	1888.99	880.001	36.234	2437.42	276.898	938.859	84.7329	105.429	1579.18	329.771	36.234	84.7329	675.817	192.349	1289.73	1215.76	2133.31	192.349					27751.3
response to lipopolysaccharide	109.813	617.376	574.629	25.08	192.349	2535.92	0	928.936	36.234	20.6961	617.376	1556.98	1268.11	1888.99	20.6961	2088.94	311.56	538.395	20.6961	1888.99	880.001	36.234	2437.42	276.898	938.859	84.7329	105.429	1579.18	329.771	36.234	84.7329	675.817	192.349	1289.73	1215.76	2133.31	192.349						27730.6
response to peptide hormone	617.376	1460.46	84.7329	2535.92	0	938.859	84.7329	84.7329	20.6961	1653.38	1579.18	1316.14	0	20.6961	1552.77	45.7761	2272.87	1316.14	36.234	1568.82	2196.38	1387.28	538.395	2444.85	36.234	84.7329	1653.38	86.68	192.349	801.437	1084.36												27695.6
regulation of cell-cell adhesion	617.376	84.7329	2535.92	938.859	928.936	36.234	84.7329	25.08	84.7329	84.7329	617.376	2196.14	290.864	1888.99	2088.94	1653.38	84.7329	617.376	0	20.6961	1552.77	204.184	2272.87	1943.62	105.429	1387.28	84.7329	3267.22	36.234	801.437	20.6961	938.859											27495.2
regulation of membrane potential	86.68	1579.18	2219.99	2531.53	880.001	2437.42	1568.82	2196.38	1579.18	1794.97	3267.22	0	1289.73	327.344	1663.91	1665.86	2133.31	84.7329	113.511																								27419.8
cellular response to external stimulus	617.376	1460.46	192.349	0	2242.62	158.118	25.08	290.864	2400.5	1556.98	86.68	1653.38	538.395	2531.53	1552.77	1888.99	84.7329	1316.14	2437.42	2085.24	2508.56	249.96	938.859																				26817
ERK1 and ERK2 cascade	617.376	204.184	192.349	938.859	20.6961	84.7329	290.864	2400.5	86.68	1653.38	311.56	538.395	2219.99	617.376	592.296	1888.99	84.7329	204.184	704.056	704.056	105.429	1579.18	36.234	1270.78	36.234	1529.18	592.296	1653.38	617.376	20.6961	1663.91	938.859	1279.9	1023.59	113.511								26815.8
negative regulation of transport	617.376	240.418	192.349	0	2242.62	20.6961	837.671	1653.38	311.56	2531.53	20.6961	880.001	1579.18	1270.78	1794.97	84.7329	1364.63	944.474	36.234	84.7329	84.7329	2401.19	1663.91	1215.76	1665.86	938.859	1023.59	938.859															26640.8
carboxylic acid transport	574.629	1460.46	20.6961	45.7761	1552.77	84.7329	45.7761	2437.42	2196.38	938.859	86.68	1794.97	938.859	3267.22	675.817	565.226	2401.19	20.6961	1663.91	2923.61	801.437	959.555	938.859																				26395.5
organic acid transport	574.629	1460.46	20.6961	45.7761	1552.77	84.7329	45.7761	2437.42	2196.38	938.859	86.68	1794.97	938.859	3267.22	675.817	565.226	2401.19	20.6961	1663.91	2923.61	801.437	959.555	938.859																				26395.5
calcium ion transport	617.376	0	20.6961	158.118	878.49	290.864	1268.11	311.56	20.6961	84.7329	84.7329	2437.42	1373.54	704.056	2196.38	1579.18	1270.78	944.474	3267.22	84.7329	36.234	84.7329	617.376	327.344	1663.91	801.437	938.859	938.859	2133.31	801.437	105.429	113.511											26155.6
divalent metal ion transport	617.376	0	20.6961	158.118	878.49	290.864	1268.11	311.56	20.6961	84.7329	84.7329	2437.42	1373.54	704.056	2196.38	1579.18	1270.78	944.474	3267.22	84.7329	36.234	84.7329	617.376	327.344	1663.91	801.437	938.859	938.859	2133.31	801.437	105.429	113.511											26155.6
divalent inorganic cation transport	617.376	0	20.6961	158.118	878.49	290.864	1268.11	311.56	20.6961	84.7329	84.7329	2437.42	1373.54	704.056	2196.38	1579.18	1270.78	944.474	3267.22	84.7329	36.234	84.7329	617.376	327.344	1663.91	801.437	938.859	938.859	2133.31	801.437	105.429	113.511											26155.6
reproductive structure development	617.376	1460.46	36.234	0	158.118	36.234	2400.5	1888.99	1653.38	538.395	938.859	1004.13	20.6961	1888.99	704.056	704.056	702.109	378.086	938.859	817.176	1387.28	84.7329	675.817	565.226	938.859	1279.9	698.331	2111.14	1350.6														25978.6
reproductive system development	617.376	1460.46	36.234	0	158.118	36.234	2400.5	1888.99	1653.38	538.395	938.859	1004.13	20.6961	1888.99	704.056	704.056	702.109	378.086	938.859	817.176	1387.28	84.7329	675.817	565.226	938.859	1279.9	698.331	2111.14	1350.6														25978.6
regulation of DNA-binding transcription factor activity	617.376	1460.46	2535.92	2242.62	20.6961	36.234	84.7329	1556.98	1888.99	86.68	20.6961	538.395	938.859	1888.99	325.151	1565.71	1031.73	84.7329	309.613	938.859	84.7329	1888.99	20.6961	107.376	1279.9	801.437	2111.14	1350.6															25818.3
regulation of apoptotic signaling pathway	617.376	240.418	2535.92	0	938.859	2242.62	20.6961	36.234	84.7329	290.864	1556.98	1579.18	675.817	2531.53	325.151	1316.14	1568.82	702.109	84.7329	3267.22	36.234	1653.38	2111.14	1350.6																			25766.7
maintenance of location	1460.46	938.859	878.49	290.864	1268.11	837.671	311.56	84.7329	1552.77	2437.42	1373.54	2196.38	938.859	1270.78	84.7329	1663.91	938.859	1215.76	2923.61	2133.31	938.859																						25739.6
positive regulation of cytosolic calcium ion concentration	192.349	2535.92	878.49	228.583	290.864	617.376	1268.11	751.336	311.56	938.859	84.7329	880.001	704.056	2437.42	1373.54	84.7329	2196.38	1270.78	329.771	36.234	36.234	84.7329	592.296	36.234	192.349	617.376	1663.91	938.859	801.437	105.429	192.349	617.376	2401.19										25690.9
cellular response to peptide	617.376	1460.46	84.7329	2535.92	938.859	84.7329	25.08	84.7329	1653.38	1579.18	1316.14	0	20.6961	84.7329	45.7761	2272.87	1316.14	36.234	1568.82	86.68	1387.28	2444.85	36.234	84.7329	1653.38	86.68	192.349	801.437	2081.34	1084.36													25665.2
peptidyl-serine modification	204.184	84.7329	0	20.6961	84.7329	84.7329	2400.5	928.936	1556.98	1888.99	20.6961	1579.18	538.395	2531.53	1888.99	325.151	45.7761	0	1568.82	702.109	171.413	3034.49	105.429	938.859	1589.51	84.7329	309.613	84.7329	2508.56	20.6961	192.349												25495.5
intracellular receptor signaling pathway	1460.46	2535.92	158.118	1268.11	2303.49	837.671	1579.18	938.859	617.376	938.859	1552.77	1031.73	938.859	675.817	84.7329	675.817	565.226	538.395	2339.73	107.376	1215.76	2111.14	938.859																				25414.3
lipid localization	574.629	1460.46	938.859	20.6961	84.7329	837.671	1653.38	20.6961	1552.77	84.7329	45.7761	2437.42	938.859	86.68	938.859	675.817	565.226	20.6961	1663.91	1215.76	2923.61	698.331	2133.31	801.437	938.859	959.555	938.859																25211.6
DNA-templated transcription, initiation	1460.46	36.234	158.118	1268.11	86.68	2303.49	837.671	538.395	938.859	938.859	1552.77	36.234	1031.73	3034.49	938.859	675.817	1589.51	675.817	565.226	538.395	2339.73	107.376	86.68	1215.76	2111.14																		25066.4
positive regulation of catabolic process	2242.62	36.234	84.7329	928.936	538.395	2219.99	2531.53	1552.77	325.151	1316.14	2437.42	1568.82	171.413	84.7329	1387.28	1270.78	1794.97	944.474	1653.38	801.437	192.349	959.555																					25043.1
G protein-coupled receptor signaling pathway, coupled to cyclic nucleotide second messenger	192.349	20.6961	84.7329	880.001	84.7329	105.429	1579.18	1270.78	329.771	1794.97	2085.24	36.234	36.234	944.474	86.68	3267.22	84.7329	192.349	2401.19	1289.73	617.376	1663.91	1665.86	1665.86	192.349	2401.19																	24973.3
positive regulation of secretion by cell	192.349	2535.92	20.6961	1592.47	36.234	2400.5	837.671	1653.38	84.7329	880.001	2437.42	938.859	2085.24	3267.22	36.234	1491.71	327.344	20.6961	1663.91	938.859	698.331	801.437																					24941.2
organic hydroxy compound transport	1460.46	1592.47	837.671	1653.38	20.6961	880.001	1270.78	944.474	3267.22	84.7329	565.226	2401.19	327.344	20.6961	1663.91	1215.76	2923.61	698.331	2133.31	938.859																							24900.1
regulation of ERK1 and ERK2 cascade	617.376	204.184	938.859	20.6961	84.7329	290.864	2400.5	86.68	1653.38	311.56	538.395	2219.99	617.376	592.296	84.7329	204.184	704.056	704.056	105.429	1579.18	36.234	1270.78	36.234	1529.18	592.296	1653.38	617.376	20.6961	1663.91	938.859	1279.9	1023.59	113.511										24734.5
response to toxic substance	109.813	0	1592.47	1761.93	20.6961	538.395	45.7761	1888.99	928.936	1316.14	1542.94	36.234	592.296	704.056	3034.49	1589.51	1402.82	1663.91	2923.61	2081.34	959.555																						24733.9
reactive oxygen species metabolic process	109.813	617.376	574.629	2535.92	0	878.49	36.234	84.7329	2196.14	2400.5	1888.99	2531.53	592.296	2437.42	704.056	276.898	171.413	2196.38	84.7329	36.234	20.6961	801.437	938.859	192.349	2133.31																		24440.4
transcription initiation from RNA polymerase II promoter	1460.46	36.234	158.118	1268.11	2303.49	837.671	938.859	938.859	1552.77	36.234	1031.73	3034.49	938.859	675.817	1589.51	675.817	565.226	538.395	2339.73	86.68	1215.76	2111.14																					24334
lipid transport	574.629	1460.46	20.6961	84.7329	837.671	1653.38	20.6961	1552.77	84.7329	45.7761	2437.42	938.859	86.68	938.859	675.817	565.226	20.6961	1663.91	1215.76	2923.61	698.331	2133.31	801.437	938.859	959.555	938.859																	24272.7
organ growth	1592.47	1888.99	1653.38	938.859	1552.77	1888.99	704.056	702.109	3034.49	378.086	675.817	1387.28	1589.51	36.234	675.817	565.226	801.437	698.331	2111.14	1350.6																							24225.6
gland development	84.7329	36.234	2535.92	2242.62	158.118	36.234	2400.5	928.936	862.952	86.68	538.395	938.859	1888.99	1542.94	704.056	704.056	702.109	378.086	84.7329	36.234	675.817	565.226	1663.91	2133.31	2111.14																		24040.8
peptidyl-serine phosphorylation	204.184	84.7329	0	20.6961	84.7329	84.7329	2400.5	928.936	1556.98	1888.99	20.6961	538.395	2531.53	1888.99	325.151	45.7761	0	1568.82	702.109	171.413	3034.49	105.429	938.859	1589.51	84.7329	309.613	84.7329	2508.56	20.6961	192.349													23916.3
anatomical structure homeostasis	0	20.6961	84.7329	36.234	84.7329	2400.5	1653.38	311.56	1579.18	538.395	675.817	1888.99	880.001	2437.42	704.056	171.413	105.429	1794.97	36.234	2444.85	592.296	2508.56	20.6961	698.331	2081.34	0																	23749.8
negative regulation of immune system process	1460.46	192.349	938.859	2242.62	20.6961	290.864	617.376	837.671	2088.94	617.376	0	20.6961	204.184	2272.87	880.001	1794.97	84.7329	3267.22	592.296	1289.73	1663.91	938.859	1215.76																				23532.4
regulation of developmental growth	84.7329	1592.47	1888.99	1552.77	1888.99	36.234	1568.82	702.109	3034.49	378.086	938.859	1387.28	1589.51	1663.91	801.437	698.331	2111.14	1350.6																									23268.8
positive regulation of cellular catabolic process	2242.62	36.234	84.7329	928.936	538.395	2219.99	2531.53	1552.77	325.151	1316.14	2437.42	1568.82	171.413	84.7329	1387.28	1270.78	944.474	1653.38	801.437	192.349	959.555																						23248.1
regulation of binding	240.418	1460.46	2535.92	2242.62	84.7329	928.936	1556.98	862.952	86.68	1579.18	538.395	675.817	2531.53	1552.77	36.234	1568.82	702.109	84.7329	2508.56	1350.6																							23128.4
response to reactive oxygen species	109.813	240.418	2242.62	204.184	84.7329	2400.5	1556.98	862.952	86.68	20.6961	538.395	2531.53	20.6961	1888.99	325.151	0	1316.14	704.056	592.296	1373.54	704.056	3034.49	84.7329	84.7329	938.859	36.234	959.555																22943
cellular response to peptide hormone stimulus	1460.46	84.7329	2535.92	938.859	84.7329	84.7329	1653.38	1579.18	1316.14	0	20.6961	45.7761	2272.87	1316.14	36.234	1568.82	1387.28	2444.85	36.234	84.7329	1653.38	86.68	192.349	801.437	1084.36																		22770
regulation of circadian rhythm	1460.46	1556.98	938.859	1552.77	325.151	1568.82	3034.49	36.234	1794.97	84.7329	3267.22	1888.99	327.344	1663.91	192.349	1215.76	1665.86																										22574.9
cellular response to extracellular stimulus	617.376	1460.46	2242.62	158.118	25.08	290.864	1556.98	86.68	538.395	2531.53	1552.77	1888.99	84.7329	1316.14	2437.42	2085.24	2508.56	249.96	938.859																								22570.8
steroid metabolic process	158.118	1268.11	1087.63	938.859	938.859	704.056	36.234	276.898	36.234	938.859	120.967	538.395	1402.82	565.226	938.859	801.437	315.944	2923.61	2133.31	938.859	2081.34	1179.28	1023.59	1084.36																			22431.9
vascular process in circulatory system	617.376	0	2242.62	1592.47	2400.5	617.376	311.56	45.7761	84.7329	84.7329	938.859	1270.78	1794.97	2085.24	36.234	944.474	3267.22	36.234	84.7329	192.349	1665.86	84.7329	1023.59	938.859																			22361.3
regulation of neuron death	84.7329	2535.92	2242.62	36.234	86.68	311.56	1579.18	675.817	2531.53	20.6961	1552.77	1568.82	1794.97	36.234	3267.22	36.234	801.437	1279.9	1665.86	25.08	113.511																						22247
neuron death	84.7329	2535.92	2242.62	36.234	86.68	311.56	1579.18	675.817	2531.53	20.6961	1552.77	1568.82	1794.97	36.234	3267.22	36.234	801.437	1279.9	1665.86	25.08	113.511																						22247
regulation of intracellular transport	2535.92	0	84.7329	1556.98	1888.99	1653.38	538.395	2531.53	0	1888.99	204.184	1316.14	1568.82	3034.49	36.234	1653.38	801.437	938.859																									22232.4
regulation of metal ion transport	617.376	0	20.6961	878.49	311.56	20.6961	84.7329	84.7329	2437.42	704.056	1270.78	1794.97	944.474	3267.22	84.7329	0	36.234	617.376	1663.91	801.437	938.859	938.859	1665.86	2133.31	801.437	105.429																	22224.7
response to alcohol	617.376	1460.46	36.234	192.349	1268.11	1579.18	1542.94	880.001	36.234	702.109	3034.49	84.7329	1579.18	329.771	36.234	327.344	1663.91	801.437	938.859	2923.61	698.331	1023.59	192.349																				21948.8
activation of MAPK activity	290.864	1888.99	1653.38	538.395	2531.53	1888.99	2437.42	84.7329	3034.49	36.234	2085.24	1888.99	1653.38	801.437	20.6961	801.437	113.511																										21749.7
regulation of neurotransmitter levels	1592.47	2531.53	880.001	2437.42	1568.82	1270.78	2085.24	3267.22	36.234	84.7329	84.7329	2401.19	1491.71	327.344	1663.91																												21723.3
stress-activated protein kinase signaling cascade	192.349	20.6961	84.7329	2400.5	1556.98	1888.99	20.6961	538.395	1316.14	1888.99	84.7329	325.151	36.234	2085.24	309.613	938.859	1888.99	1653.38	20.6961	2081.34	1350.6	1023.59																					21706.9
regulation of intracellular protein transport	2535.92	0	84.7329	1556.98	1888.99	1653.38	2531.53	0	1888.99	204.184	1316.14	1568.82	3034.49	36.234	1653.38	801.437	938.859																										21694.1
negative regulation of response to external stimulus	1460.46	192.349	938.859	928.936	36.234	20.6961	878.49	84.7329	2196.14	290.864	837.671	204.184	1552.77	704.056	938.859	1794.97	84.7329	3267.22	1289.73	1663.91	1215.76	1023.59																					21605.2
positive regulation of cellular protein localization	2535.92	0	878.49	84.7329	2400.5	1556.98	1888.99	1579.18	675.817	0	1888.99	204.184	1316.14	1568.82	3034.49	36.234	801.437	192.349	938.859																								21582.1
lipid catabolic process	84.7329	1087.63	1552.77	880.001	36.234	276.898	36.234	938.859	817.176	1794.97	938.859	724.752	944.474	675.817	1141.36	938.859	2923.61	775.545	801.437	105.429	2081.34	959.555	938.859																				21455.4
adenylate cyclase-modulating G protein-coupled receptor signaling pathway	192.349	20.6961	84.7329	880.001	84.7329	105.429	1579.18	329.771	1794.97	2085.24	36.234	944.474	86.68	3267.22	84.7329	192.349	2401.19	1289.73	1663.91	1665.86	192.349	2401.19																					21383
alcohol metabolic process	158.118	592.296	36.234	276.898	36.234	938.859	817.176	120.967	347.794	1402.82	675.817	565.226	938.859	938.859	928.936	801.437	938.859	2923.61	698.331	938.859	2081.34	1023.59	1084.36	2081.34																			21346.8
regulation of blood pressure	574.629	25.08	1460.46	0	2242.62	1761.93	311.56	1552.77	880.001	84.7329	2196.38	1794.97	538.395	84.7329	1663.91	2923.61	2111.14	1084.36																									21291.3
hormone-mediated signaling pathway	1460.46	2535.92	2303.49	1653.38	1579.18	938.859	20.6961	1552.77	1031.73	938.859	675.817	84.7329	675.817	565.226	538.395	2339.73	107.376	2111.14																									21113.6
positive regulation of ERK1 and ERK2 cascade	617.376	204.184	20.6961	84.7329	290.864	2400.5	86.68	1653.38	311.56	538.395	2219.99	617.376	592.296	84.7329	704.056	704.056	105.429	1579.18	36.234	1270.78	36.234	1529.18	592.296	617.376	1663.91	1279.9	1023.59	113.511															20978.5
regeneration	1460.46	36.234	2535.92	2242.62	2400.5	928.936	86.68	1542.94	36.234	592.296	3034.49	378.086	938.859	1589.51	36.234	801.437	2133.31																										20774.7
regulation of tube diameter	617.376	0	2242.62	1592.47	2400.5	311.56	84.7329	84.7329	938.859	1270.78	1794.97	2085.24	36.234	944.474	3267.22	84.7329	192.349	1665.86	84.7329	1023.59																							20723
regulation of blood vessel diameter	617.376	0	2242.62	1592.47	2400.5	311.56	84.7329	84.7329	938.859	1270.78	1794.97	2085.24	36.234	944.474	3267.22	84.7329	192.349	1665.86	84.7329	1023.59																							20723
regulation of tube size	617.376	0	2242.62	1592.47	2400.5	311.56	84.7329	84.7329	938.859	1270.78	1794.97	2085.24	36.234	944.474	3267.22	84.7329	192.349	1665.86	84.7329	1023.59																							20723
regulation of hormone secretion	574.629	2535.92	36.234	2196.14	2400.5	1653.38	20.6961	84.7329	880.001	938.859	105.429	1794.97	1364.63	944.474	36.234	1663.91	1665.86	698.331	1023.59																								20618.5
hormone secretion	574.629	2535.92	36.234	2196.14	2400.5	1653.38	20.6961	84.7329	880.001	938.859	105.429	1794.97	1364.63	944.474	36.234	1663.91	1665.86	698.331	1023.59																								20618.5
hormone transport	574.629	2535.92	36.234	2196.14	2400.5	1653.38	20.6961	84.7329	880.001	938.859	105.429	1794.97	1364.63	944.474	36.234	1663.91	1665.86	698.331	1023.59																								20618.5
muscle system process	84.7329	0	2242.62	228.583	20.6961	311.56	1579.18	84.7329	1552.77	84.7329	2196.38	84.7329	105.429	1387.28	1270.78	1794.97	2085.24	84.7329	944.474	36.234	84.7329	0	938.859	327.344	1663.91	801.437	192.349	70.6936	84.7329	105.429													20449.4
negative regulation of catabolic process	574.629	84.7329	2242.62	2400.5	1888.99	862.952	2531.53	1552.77	880.001	1387.28	1794.97	944.474	36.234	2133.31	105.429	1023.59																											20444
negative regulation of phosphorylation	938.859	84.7329	290.864	86.68	1316.14	2531.53	20.6961	1552.77	2437.42	1589.51	938.859	3267.22	1653.38	1663.91	938.859	86.68	1023.59																										20421.7
aging	109.813	617.376	0	20.6961	84.7329	1888.99	86.68	538.395	675.817	2531.53	1888.99	1542.94	880.001	704.056	3034.49	1270.78	84.7329	1279.9	2133.31	1023.59																							20396.8
cellular response to metal ion	240.418	204.184	0	2242.62	2400.5	1556.98	86.68	20.6961	1579.18	538.395	617.376	2531.53	1888.99	325.151	276.898	1589.51	938.859	2133.31	1084.36																								20255.6
cellular response to inorganic substance	240.418	204.184	0	2242.62	2400.5	1556.98	86.68	20.6961	1579.18	538.395	617.376	2531.53	1888.99	325.151	0	276.898	1589.51	938.859	2133.31	1084.36																							20255.6
neurotransmitter transport	1592.47	2531.53	880.001	2437.42	1568.82	1270.78	2085.24	3267.22	36.234	84.7329	84.7329	2401.19	327.344	1663.91																													20231.6
protein autophosphorylation	2535.92	290.864	2400.5	928.936	86.68	538.395	1316.14	2219.99	2531.53	204.184	704.056	1568.82	704.056	36.234	1387.28	1364.63	36.234	20.6961	1279.9																								20155
cellular ketone metabolic process	1460.46	0	837.671	2088.94	1552.77	880.001	938.859	1215.76	2923.61	2081.34	1023.59	1084.36	2081.34	959.555	938.859																												20067.1
positive regulation of cell adhesion	617.376	84.7329	2535.92	928.936	36.234	84.7329	25.08	84.7329	617.376	2196.14	290.864	1653.38	2219.99	84.7329	617.376	0	204.184	2272.87	1943.62	1568.82	105.429	84.7329	36.234	801.437	20.6961	938.859																	20054.5
myeloid cell differentiation	240.418	1460.46	2535.92	938.859	84.7329	36.234	1888.99	86.68	1653.38	1579.18	0	20.6961	2272.87	105.429	84.7329	675.817	2444.85	592.296	84.7329	801.437	617.376	801.437	938.859	86.68	0																		20032.1
response to oxygen levels	617.376	574.629	1460.46	0	2242.62	204.184	1592.47	36.234	675.817	204.184	20.6961	1552.77	84.7329	1316.14	36.234	704.056	84.7329	938.859	84.7329	1589.51	1794.97	105.429	84.7329	538.395	84.7329	327.344	1663.91	192.349	84.7329	25.08	113.511	959.555											19995.2
phosphatidylinositol-mediated signaling	84.7329	2535.92	878.49	84.7329	2400.5	311.56	538.395	1316.14	2219.99	0	1888.99	204.184	45.7761	704.056	704.056	84.7329	938.859	1387.28	1270.78	36.234	938.859	1279.9	0	105.429																			19959.6
inositol lipid-mediated signaling	84.7329	2535.92	878.49	84.7329	2400.5	311.56	538.395	1316.14	2219.99	0	1888.99	204.184	45.7761	704.056	704.056	84.7329	938.859	1387.28	1270.78	36.234	938.859	1279.9	0	105.429																			19959.6
phosphatidylinositol 3-kinase signaling	84.7329	2535.92	878.49	84.7329	2400.5	311.56	538.395	1316.14	2219.99	0	1888.99	204.184	704.056	704.056	84.7329	938.859	1387.28	1270.78	36.234	938.859	1279.9	0	105.429																				19913.8
negative regulation of defense response	1460.46	192.349	938.859	928.936	36.234	878.49	84.7329	2196.14	290.864	837.671	1552.77	938.859	1794.97	84.7329	3267.22	1289.73	1663.91	1215.76																									19652.7
cellular response to steroid hormone stimulus	617.376	2535.92	2400.5	2303.49	1579.18	938.859	1552.77	1031.73	938.859	84.7329	565.226	538.395	2339.73	107.376	2111.14																												19645.3
stress-activated MAPK cascade	192.349	20.6961	84.7329	2400.5	1556.98	1888.99	20.6961	538.395	1316.14	1888.99	84.7329	325.151	36.234	2085.24	309.613	938.859	1888.99	1653.38	20.6961	1350.6	1023.59																						19625.5
positive regulation of ion transport	20.6961	878.49	1592.47	84.7329	311.56	84.7329	84.7329	2437.42	704.056	1794.97	944.474	3267.22	36.234	84.7329	0	617.376	327.344	1663.91	801.437	938.859	2133.31	801.437																					19610.2
cell chemotaxis	20.6961	84.7329	84.7329	2196.14	617.376	1268.11	1888.99	862.952	751.336	538.395	2219.99	1888.99	704.056	704.056	86.68	1387.28	36.234	724.752	36.234	1289.73	617.376	20.6961	801.437	0	105.429	617.376																	19553.8
response to mechanical stimulus	109.813	1460.46	192.349	0	2400.5	1556.98	1888.99	86.68	1653.38	538.395	2437.42	1373.54	1270.78	1589.51	36.234	1663.91	1279.9																										19538.9
positive regulation of cytokine production	192.349	2535.92	0	20.6961	928.936	36.234	20.6961	84.7329	36.234	84.7329	290.864	1888.99	20.6961	2088.94	1653.38	311.56	84.7329	0	2437.42	84.7329	36.234	36.234	2085.24	944.474	938.859	801.437	20.6961	1663.91	192.349														19521.3
response to ketone	617.376	1460.46	36.234	192.349	2400.5	2303.49	1579.18	1542.94	36.234	329.771	105.429	938.859	192.349	1215.76	2133.31	2111.14	2081.34	192.349																									19469.1
cellular response to abiotic stimulus	192.349	0	2400.5	1556.98	1888.99	1653.38	1579.18	538.395	0	20.6961	1316.14	2196.38	1888.99	2133.31	2081.34																												19446.6
cellular response to environmental stimulus	192.349	0	2400.5	1556.98	1888.99	1653.38	1579.18	538.395	0	20.6961	1316.14	2196.38	1888.99	2133.31	2081.34																												19446.6
carboxylic acid biosynthetic process	0	20.6961	1761.93	2196.14	837.671	2088.94	617.376	592.296	36.234	276.898	36.234	120.967	675.817	1402.82	146.047	675.817	938.859	20.6961	249.96	1215.76	2923.61	775.545	801.437	938.859																			19350.6
organic acid biosynthetic process	0	20.6961	1761.93	2196.14	837.671	2088.94	617.376	592.296	36.234	276.898	36.234	120.967	675.817	1402.82	146.047	675.817	938.859	20.6961	249.96	1215.76	2923.61	775.545	801.437	938.859																			19350.6
positive regulation of peptide secretion	192.349	2535.92	20.6961	36.234	2400.5	837.671	84.7329	2437.42	938.859	1794.97	3267.22	1491.71	20.6961	1663.91	698.331	801.437																											19222.7
cellular response to reactive oxygen species	109.813	240.418	204.184	84.7329	2400.5	1556.98	862.952	86.68	20.6961	538.395	2531.53	1888.99	325.151	0	1316.14	704.056	592.296	704.056	3034.49	84.7329	938.859	959.555																					19185.2
dephosphorylation	2535.92	938.859	84.7329	290.864	1653.38	2531.53	1568.82	704.056	1794.97	1402.82	309.613	801.437	1653.38	1663.91	938.859	192.349																											19065.5
negative regulation of secretion	192.349	2242.62	1653.38	311.56	880.001	1579.18	1794.97	84.7329	1364.63	944.474	36.234	2401.19	1663.91	1215.76	1665.86	1023.59																											19054.4
negative regulation of secretion by cell	192.349	2242.62	1653.38	311.56	880.001	1579.18	1794.97	1364.63	944.474	36.234	2401.19	1663.91	1215.76	1665.86	1023.59																												18969.7
regulation of leukocyte cell-cell adhesion	617.376	84.7329	938.859	928.936	36.234	84.7329	25.08	84.7329	617.376	2196.14	290.864	2088.94	1653.38	84.7329	0	20.6961	1552.77	204.184	2272.87	84.7329	3267.22	36.234	801.437	20.6961	938.859																		18931.8
leukocyte cell-cell adhesion	617.376	84.7329	938.859	928.936	36.234	84.7329	25.08	84.7329	617.376	2196.14	290.864	2088.94	1653.38	84.7329	0	20.6961	1552.77	204.184	2272.87	84.7329	3267.22	36.234	801.437	20.6961	938.859																		18931.8
sensory perception of pain	0	311.56	538.395	1888.99	880.001	2437.42	1373.54	2196.38	1579.18	1270.78	1794.97	36.234	1289.73	327.344	1279.9	775.545	938.859																										18918.8
negative regulation of protein phosphorylation	938.859	84.7329	290.864	86.68	1316.14	2531.53	20.6961	2437.42	1589.51	938.859	3267.22	1653.38	1663.91	938.859	86.68	1023.59																											18868.9
peptide hormone secretion	574.629	2535.92	36.234	2196.14	2400.5	1653.38	20.6961	84.7329	880.001	938.859	105.429	1364.63	944.474	36.234	1663.91	1665.86	698.331	1023.59																									18823.5
epithelial cell proliferation	1460.46	36.234	2242.62	158.118	36.234	2196.14	2400.5	86.68	2219.99	938.859	592.296	1888.99	204.184	702.109	378.086	938.859	105.429	36.234	36.234	2111.14																							18769.4
regulation of peptide hormone secretion	574.629	2535.92	36.234	2196.14	2400.5	1653.38	84.7329	880.001	938.859	105.429	1364.63	944.474	1663.91	1665.86	698.331	1023.59																											18766.6
monocarboxylic acid biosynthetic process	0	20.6961	1761.93	2196.14	837.671	2088.94	617.376	36.234	276.898	36.234	120.967	675.817	1402.82	146.047	675.817	938.859	249.96	1215.76	2923.61	775.545	801.437	938.859																					18737.6
neurotransmitter secretion	2531.53	880.001	2437.42	1568.82	1270.78	2085.24	3267.22	36.234	84.7329	2401.19	327.344	1663.91																															18554.4
signal release from synapse	2531.53	880.001	2437.42	1568.82	1270.78	2085.24	3267.22	36.234	84.7329	2401.19	327.344	1663.91																															18554.4
response to radiation	617.376	36.234	0	928.936	36.234	290.864	2400.5	1556.98	1888.99	1579.18	0	20.6961	1316.14	1579.18	36.234	1888.99	327.344	1663.91	1279.9	1023.59																							18471.3
positive regulation of lipid metabolic process	1460.46	0	878.49	84.7329	837.671	1552.77	704.056	704.056	938.859	1387.28	1270.78	1794.97	801.437	938.859	1215.76	2923.61	959.555																										18453.4
regulation of phosphatidylinositol 3-kinase signaling	84.7329	2535.92	878.49	84.7329	2400.5	311.56	538.395	1316.14	2219.99	0	1888.99	704.056	704.056	84.7329	938.859	1387.28	36.234	938.859	1279.9	0	105.429																						18438.9
gliogenesis	1460.46	878.49	2400.5	1653.38	538.395	675.817	84.7329	1888.99	204.184	3034.49	84.7329	84.7329	36.234	3267.22	2133.31																												18425.7
regulation of reactive oxygen species metabolic process	617.376	2535.92	0	878.49	36.234	84.7329	2196.14	2400.5	1888.99	592.296	704.056	171.413	2196.38	36.234	20.6961	801.437	938.859	192.349	2133.31																								18425.4
response to nutrient	1460.46	36.234	0	2242.62	158.118	1592.47	2400.5	84.7329	1316.14	1542.94	880.001	938.859	84.7329	2508.56	2133.31	1023.59																											18403.3
temperature homeostasis	2535.92	0	837.671	1316.14	880.001	2196.38	1270.78	1794.97	938.859	347.794	938.859	1491.71	20.6961	1663.91	1215.76	938.859																											18388.3
T cell activation	617.376	84.7329	192.349	938.859	36.234	84.7329	25.08	84.7329	290.864	2088.94	1653.38	84.7329	0	938.859	20.6961	204.184	2272.87	1004.13	2437.42	84.7329	3267.22	36.234	801.437	20.6961	938.859	0	105.429																18314.8
ossification	192.349	0	204.184	36.234	2196.14	2400.5	1888.99	1653.38	538.395	84.7329	617.376	1888.99	84.7329	2437.42	378.086	1387.28	36.234	617.376	1491.71																								18134.1
phagocytosis	1460.46	84.7329	928.936	84.7329	290.864	862.952	538.395	617.376	0	1888.99	2437.42	171.413	84.7329	1387.28	1794.97	3267.22	938.859	36.234	20.6961	1215.76																							18112
protein localization to nucleus	2535.92	0	878.49	84.7329	1888.99	1579.18	675.817	2531.53	0	1888.99	1316.14	1568.82	3034.49	36.234	20.6961																												18040
vesicle-mediated transport in synapse	2531.53	880.001	2437.42	1568.82	1270.78	2085.24	3267.22	84.7329	1888.99	327.344	1663.91																																18006
blood coagulation	84.7329	2535.92	84.7329	878.49	84.7329	1653.38	311.56	538.395	204.184	0	84.7329	1888.99	704.056	2437.42	84.7329	84.7329	105.429	84.7329	944.474	3267.22	675.817	36.234	84.7329	20.6961	938.859	105.429																	17924.4
hemostasis	84.7329	2535.92	84.7329	878.49	84.7329	1653.38	311.56	538.395	204.184	0	84.7329	1888.99	704.056	2437.42	84.7329	84.7329	105.429	84.7329	944.474	3267.22	675.817	36.234	84.7329	20.6961	938.859	105.429																	17924.4
coagulation	84.7329	2535.92	84.7329	878.49	84.7329	1653.38	311.56	538.395	204.184	0	84.7329	1888.99	704.056	2437.42	84.7329	84.7329	105.429	84.7329	944.474	3267.22	675.817	36.234	84.7329	20.6961	938.859	105.429																	17924.4
negative regulation of neuron death	84.7329	2535.92	2242.62	36.234	86.68	311.56	675.817	2531.53	1552.77	1568.82	36.234	3267.22	36.234	1279.9	1665.86																												17912.1
protein kinase B signaling	84.7329	2400.5	862.952	1653.38	1316.14	2219.99	938.859	0	204.184	704.056	704.056	702.109	171.413	84.7329	1387.28	36.234	1663.91	1279.9	0	105.429	1350.6																						17870.4
regulation of regulated secretory pathway	2242.62	2531.53	880.001	1568.82	1270.78	2085.24	944.474	3267.22	84.7329	327.344	20.6961	1663.91	938.859																														17826.2
regulation of exocytosis	2242.62	2531.53	880.001	1568.82	1270.78	2085.24	944.474	3267.22	84.7329	327.344	20.6961	1663.91	938.859																														17826.2
cellular response to nutrient levels	617.376	1460.46	2242.62	158.118	1556.98	86.68	538.395	2531.53	1552.77	1888.99	84.7329	1316.14	2508.56	249.96	938.859																												17732.2
response to hypoxia	617.376	574.629	0	2242.62	204.184	1592.47	36.234	675.817	204.184	20.6961	1552.77	84.7329	1316.14	84.7329	938.859	1589.51	1794.97	105.429	84.7329	538.395	84.7329	327.344	1663.91	192.349	84.7329	25.08	113.511	959.555															17709.7
response to decreased oxygen levels	617.376	574.629	0	2242.62	204.184	1592.47	36.234	675.817	204.184	20.6961	1552.77	84.7329	1316.14	84.7329	938.859	1589.51	1794.97	105.429	84.7329	538.395	84.7329	327.344	1663.91	192.349	84.7329	25.08	113.511	959.555															17709.7
positive regulation of synaptic transmission	0	2400.5	1888.99	880.001	1568.82	1794.97	3267.22	36.234	2444.85	327.344	1663.91	1279.9	113.511																														17666.3
protein dephosphorylation	2535.92	938.859	84.7329	290.864	1653.38	2531.53	1568.82	704.056	1794.97	309.613	801.437	1653.38	1663.91	938.859	192.349																												17662.7
regulation of calcium ion transport	617.376	0	20.6961	878.49	311.56	20.6961	84.7329	84.7329	2437.42	704.056	944.474	3267.22	84.7329	36.234	617.376	1663.91	801.437	938.859	938.859	2133.31	801.437	105.429																					17493
excitatory postsynaptic potential	2531.53	2437.42	1568.82	2196.38	1579.18	1794.97	3267.22	327.344	1663.91	113.511																																	17480.3
chemical synaptic transmission, postsynaptic	2531.53	2437.42	1568.82	2196.38	1579.18	1794.97	3267.22	327.344	1663.91	113.511																																	17480.3
regulation of postsynaptic membrane potential	2531.53	2437.42	1568.82	2196.38	1579.18	1794.97	3267.22	327.344	1663.91	113.511																																	17480.3
positive regulation of protein secretion	192.349	2535.92	20.6961	36.234	2400.5	837.671	84.7329	2437.42	938.859	3267.22	1491.71	20.6961	1663.91	698.331	801.437																												17427.7
positive regulation of small molecule metabolic process	574.629	1460.46	0	938.859	36.234	837.671	1552.77	2437.42	938.859	1270.78	2085.24	84.7329	86.68	1215.76	2923.61	959.555																											17403.3
calcium-mediated signaling	25.08	617.376	290.864	2400.5	617.376	1268.11	751.336	2219.99	2531.53	2437.42	1568.82	84.7329	86.68	84.7329	938.859	617.376	20.6961	192.349	617.376																								17371.2
regulation of blood circulation	617.376	2535.92	0	2400.5	311.56	84.7329	1565.71	1316.14	2196.38	1270.78	329.771	1794.97	84.7329	36.234	944.474	84.7329	0	1663.91	105.429																								17343.3
negative regulation of cell activation	938.859	2242.62	878.49	84.7329	290.864	2088.94	20.6961	204.184	2272.87	880.001	704.056	3267.22	1289.73	938.859	1215.76																												17317.9
positive regulation of cell cycle	36.234	20.6961	1592.47	2400.5	928.936	1653.38	675.817	45.7761	0	1316.14	36.234	704.056	3034.49	378.086	105.429	1589.51	938.859	1663.91	192.349																								17312.9
negative regulation of cell adhesion	2535.92	938.859	84.7329	290.864	2088.94	1653.38	0	20.6961	1552.77	204.184	2272.87	1387.28	3267.22	938.859																													17236.6
hormone metabolic process	25.08	36.234	1653.38	938.859	1004.13	704.056	36.234	1004.13	276.898	36.234	120.967	347.794	2923.61	698.331	2133.31	2081.34	1084.36	2081.34																									17186.3
regulation of lipid localization	1460.46	938.859	20.6961	84.7329	837.671	1653.38	20.6961	1552.77	2437.42	938.859	20.6961	1215.76	2923.61	2133.31	938.859																												17177.8
negative regulation of inflammatory response	1460.46	192.349	938.859	928.936	36.234	878.49	84.7329	2196.14	290.864	1552.77	938.859	1794.97	84.7329	3267.22	1289.73	1215.76																											17151.1
negative regulation of binding	2535.92	2242.62	84.7329	928.936	1556.98	862.952	86.68	538.395	2531.53	1552.77	36.234	1568.82	84.7329	2508.56																													17119.9
glucose homeostasis	617.376	1460.46	84.7329	938.859	36.234	2196.14	1653.38	1316.14	0	84.7329	880.001	1364.63	944.474	107.376	1665.86	698.331	1023.59	1084.36	938.859																								17095.5
carbohydrate homeostasis	617.376	1460.46	84.7329	938.859	36.234	2196.14	1653.38	1316.14	0	84.7329	880.001	1364.63	944.474	107.376	1665.86	698.331	1023.59	1084.36	938.859																								17095.5
regulation of smooth muscle cell proliferation	240.418	1460.46	2535.92	0	2242.62	928.936	204.184	2400.5	86.68	675.817	1316.14	704.056	938.859	36.234	192.349	2081.34	1023.59																										17068.1
smooth muscle cell proliferation	240.418	1460.46	2535.92	0	2242.62	928.936	204.184	2400.5	86.68	675.817	1316.14	704.056	938.859	36.234	192.349	2081.34	1023.59																										17068.1
purine-containing coMPOund metabolic process	574.629	36.234	1579.18	45.7761	290.864	2531.53	1552.77	2437.42	1270.78	2085.24	84.7329	84.7329	938.859	1508.48	938.859	1023.59																											16983.7
purine nucleotide metabolic process	574.629	36.234	1579.18	290.864	2531.53	1552.77	2437.42	1270.78	2085.24	84.7329	84.7329	938.859	1508.48	938.859	1023.59																												16937.9
cognition	0	1592.47	36.234	2400.5	86.68	20.6961	1888.99	880.001	1270.78	1794.97	36.234	36.234	36.234	36.234	2401.19	327.344	1663.91	1279.9	1023.59	113.511																							16925.7
multi-multicellular organism process	240.418	0	158.118	204.184	1592.47	2088.94	538.395	938.859	20.6961	1004.13	1888.99	880.001	938.859	538.395	565.226	938.859	2111.14	2081.34	192.349																								16921.4
regulation of peptidyl-tyrosine phosphorylation	617.376	2535.92	938.859	20.6961	84.7329	290.864	2400.5	1653.38	84.7329	704.056	84.7329	1270.78	1794.97	944.474	36.234	1653.38	801.437	20.6961	938.859																								16876.7
regulation of organ growth	1592.47	1888.99	1552.77	1888.99	702.109	3034.49	378.086	1387.28	1589.51	801.437	698.331	1350.6																															16865.1
positive regulation of proteolysis	1460.46	2535.92	36.234	928.936	1888.99	311.56	538.395	2531.53	675.817	325.151	1316.14	1568.82	84.7329	1387.28	944.474	36.234	20.6961	192.349	25.08																								16808.8
negative regulation of cell development	878.49	1592.47	675.817	2531.53	1552.77	1316.14	1568.82	2196.38	84.7329	1387.28	801.437	2133.31																															16719.2
monocarboxylic acid transport	574.629	1460.46	20.6961	45.7761	1552.77	84.7329	45.7761	2437.42	938.859	938.859	675.817	565.226	20.6961	1663.91	2923.61	801.437	959.555	938.859																									16649.1
steroid hormone mediated signaling pathway	2535.92	2303.49	1579.18	938.859	1552.77	1031.73	938.859	84.7329	565.226	538.395	2339.73	107.376	2111.14																														16627.4
positive regulation of defense response	192.349	2535.92	0	20.6961	84.7329	84.7329	2400.5	20.6961	2088.94	538.395	84.7329	2531.53	880.001	86.68	938.859	2085.24	724.752	309.613	36.234	801.437	20.6961	105.429																					16572.2
nucleocytoplasmic transport	2535.92	0	84.7329	1888.99	1653.38	2531.53	0	1888.99	1316.14	1568.82	3034.49	20.6961																															16523.7
nuclear transport	2535.92	0	84.7329	1888.99	1653.38	2531.53	0	1888.99	1316.14	1568.82	3034.49	20.6961																															16523.7
positive regulation of growth	878.49	2400.5	1888.99	1888.99	204.184	702.109	3034.49	378.086	938.859	1589.51	938.859	1663.91																															16507
calcium ion transmembrane transport	20.6961	878.49	290.864	1268.11	311.56	20.6961	84.7329	2437.42	1373.54	2196.38	1579.18	1270.78	944.474	84.7329	36.234	1663.91	801.437	938.859	105.429	113.511																							16421
regulation of insulin secretion	574.629	2535.92	36.234	2196.14	1653.38	84.7329	880.001	938.859	105.429	1364.63	944.474	1663.91	1665.86	698.331	1023.59																												16366.1
insulin secretion	574.629	2535.92	36.234	2196.14	1653.38	84.7329	880.001	938.859	105.429	1364.63	944.474	1663.91	1665.86	698.331	1023.59																												16366.1
regulation of mitochondrial membrane potential	1579.18	2219.99	2531.53	2437.42	2196.38	3267.22	2133.31																																				16365
positive regulation of cell activation	84.7329	2535.92	20.6961	36.234	20.6961	84.7329	25.08	84.7329	290.864	1653.38	84.7329	2531.53	0	2272.87	704.056	2085.24	84.7329	675.817	36.234	801.437	327.344	20.6961	938.859	938.859																			16339.5
striated muscle tissue development	1888.99	1552.77	1888.99	704.056	704.056	702.109	3034.49	378.086	675.817	1589.51	36.234	565.226	801.437	698.331	1023.59																												16243.7
muscle tissue development	1888.99	1552.77	1888.99	704.056	704.056	702.109	3034.49	378.086	675.817	1589.51	36.234	565.226	801.437	698.331	1023.59																												16243.7
regulation of autophagy	84.7329	2242.62	36.234	1556.98	862.952	538.395	2219.99	2531.53	20.6961	1568.82	84.7329	1387.28	2133.31	938.859																													16207.1
synaptic vesicle exocytosis	2531.53	880.001	2437.42	1568.82	1270.78	2085.24	3267.22	84.7329	327.344	1663.91																																	16117
synaptic vesicle cycle	2531.53	880.001	2437.42	1568.82	1270.78	2085.24	3267.22	84.7329	327.344	1663.91																																	16117
urogenital system development	240.418	617.376	938.859	2531.53	704.056	704.056	702.109	378.086	675.817	675.817	565.226	2444.85	698.331	2111.14	2081.34																												16069
regulation of response to biotic stimulus	1460.46	2535.92	938.859	20.6961	84.7329	84.7329	837.671	20.6961	1653.38	538.395	1943.62	105.429	309.613	36.234	1653.38	20.6961	1663.91	938.859	1215.76																								16063
cellular response to monoamine stimulus	538.395	2531.53	1888.99	1568.82	84.7329	1579.18	1270.78	36.234	0	2401.19	1663.91	2401.19																															15965
cellular response to catecholamine stimulus	538.395	2531.53	1888.99	1568.82	84.7329	1579.18	1270.78	36.234	0	2401.19	1663.91	2401.19																															15965
response to monoamine	538.395	2531.53	1888.99	1568.82	84.7329	1579.18	1270.78	36.234	0	2401.19	1663.91	2401.19																															15965
response to catecholamine	538.395	2531.53	1888.99	1568.82	84.7329	1579.18	1270.78	36.234	0	2401.19	1663.91	2401.19																															15965
cellular response to dopamine	538.395	2531.53	1888.99	1568.82	84.7329	1579.18	1270.78	36.234	2401.19	1663.91	2401.19																																15965
response to dopamine	538.395	2531.53	1888.99	1568.82	84.7329	1579.18	1270.78	36.234	2401.19	1663.91	2401.19																																15965
response to temperature stimulus	1460.46	0	2242.62	538.395	1888.99	1373.54	1568.82	171.413	2196.38	84.7329	1270.78	1794.97	84.7329	1279.9																													15955.7
homeostasis of number of cells	2535.92	938.859	2242.62	20.6961	36.234	617.376	1888.99	1653.38	311.56	20.6961	2272.87	2437.42	84.7329	84.7329	801.437	0																											15947.5
regulation of epithelial cell proliferation	1460.46	36.234	2242.62	158.118	36.234	2196.14	2400.5	86.68	2219.99	592.296	204.184	702.109	378.086	938.859	105.429	36.234	36.234	2111.14																									15941.5
positive regulation of intracellular protein transport	2535.92	0	84.7329	1556.98	1888.99	0	1888.99	204.184	1316.14	1568.82	3034.49	36.234	801.437	938.859																													15855.8
positive regulation of intracellular transport	2535.92	0	84.7329	1556.98	1888.99	0	1888.99	204.184	1316.14	1568.82	3034.49	36.234	801.437	938.859																													15855.8
fatty acid derivative metabolic process	0	20.6961	1761.93	2196.14	538.395	617.376	928.936	36.234	276.898	120.967	86.68	675.817	1402.82	146.047	675.817	1141.36	938.859	20.6961	249.96	315.944	775.545	801.437	1179.28	938.859																			15846.7
regulation of leukocyte migration	617.376	192.349	2242.62	928.936	20.6961	617.376	617.376	1888.99	751.336	538.395	1888.99	1387.28	1794.97	36.234	84.7329	724.752	801.437	617.376																									15751.2
negative regulation of leukocyte activation	938.859	2242.62	290.864	2088.94	20.6961	204.184	2272.87	880.001	3267.22	1289.73	938.859	1215.76																															15650.6
regulation of protein kinase B signaling	84.7329	2400.5	862.952	1653.38	1316.14	938.859	0	204.184	704.056	704.056	702.109	171.413	84.7329	1387.28	36.234	1663.91	1279.9	0	105.429	1350.6																							15650.5
leukocyte proliferation	20.6961	20.6961	84.7329	25.08	84.7329	84.7329	290.864	2088.94	538.395	290.864	84.7329	20.6961	1888.99	204.184	2272.87	2437.42	1387.28	84.7329	36.234	801.437	1508.48	327.344	20.6961	938.859	105.429																		15649.1
glial cell differentiation	1460.46	878.49	2400.5	1653.38	538.395	84.7329	1888.99	204.184	3034.49	84.7329	84.7329	36.234	3267.22																														15616.5
positive regulation of inflammatory response	192.349	2535.92	0	20.6961	2400.5	2088.94	84.7329	2531.53	880.001	86.68	938.859	2085.24	724.752	801.437	105.429																												15477.1
phospholipid metabolic process	84.7329	84.7329	837.671	617.376	0	704.056	704.056	84.7329	938.859	817.176	1387.28	1270.78	724.752	675.817	801.437	1491.71	249.96	938.859	1215.76	801.437	0	105.429	938.859																				15475.5
regulation of innate immune response	1460.46	2535.92	938.859	84.7329	84.7329	837.671	20.6961	1653.38	1943.62	309.613	36.234	1653.38	20.6961	1663.91	938.859	1215.76																											15398.5
regulation of anion transport	20.6961	84.7329	2437.42	1794.97	3267.22	2444.85	2401.19	20.6961	2923.61																																		15395.4
cell growth	1460.46	84.7329	878.49	2400.5	928.936	1552.77	204.184	1031.73	1568.82	702.109	171.413	938.859	675.817	938.859	801.437	938.859	107.376																										15385.4
negative regulation of cell-cell adhesion	2535.92	938.859	84.7329	2088.94	20.6961	1552.77	204.184	2272.87	1387.28	3267.22	938.859																																15292.3
cardiac muscle tissue development	1888.99	1552.77	1888.99	704.056	704.056	702.109	3034.49	378.086	675.817	1589.51	36.234	565.226	801.437	698.331																													15220.1
peptidyl-threonine phosphorylation	84.7329	1556.98	2531.53	1888.99	1568.82	702.109	3034.49	105.429	938.859	84.7329	2508.56	192.349																															15197.6
peptidyl-threonine modification	84.7329	1556.98	2531.53	1888.99	1568.82	702.109	3034.49	105.429	938.859	84.7329	2508.56	192.349																															15197.6
regulation of lipid biosynthetic process	0	158.118	84.7329	837.671	36.234	817.176	1270.78	938.859	938.859	938.859	1215.76	2923.61	2133.31	938.859	1023.59	938.859																											15195.3
female pregnancy	240.418	0	158.118	204.184	2088.94	538.395	938.859	20.6961	1004.13	1888.99	880.001	938.859	538.395	565.226	938.859	2111.14	2081.34																										15136.5
negative regulation of locomotion	1460.46	192.349	938.859	2242.62	928.936	20.6961	1565.71	938.859	1794.97	84.7329	3267.22	1663.91																															15099.3
endomembrane system organization	84.7329	290.864	311.56	538.395	2531.53	84.7329	1888.99	2437.42	3034.49	105.429	1589.51	84.7329	2111.14																														15093.5
regulation of synaptic transmission, glutamatergic	0	2400.5	2531.53	880.001	1270.78	1794.97	3267.22	1663.91	1279.9																																		15088.8
synaptic transmission, glutamatergic	0	2400.5	2531.53	880.001	1270.78	1794.97	3267.22	1663.91	1279.9																																		15088.8
regulation of amine transport	880.001	2437.42	1270.78	1794.97	944.474	3267.22	36.234	2401.19	327.344	1663.91																																	15023.5
amine transport	880.001	2437.42	1270.78	1794.97	944.474	3267.22	36.234	2401.19	327.344	1663.91																																	15023.5
glycerolipid metabolic process	84.7329	837.671	1653.38	617.376	0	704.056	84.7329	1270.78	938.859	724.752	675.817	1141.36	1491.71	1215.76	775.545	801.437	0	105.429	959.555	938.859																							15021.8
regulation of immune effector process	617.376	574.629	2242.62	20.6961	36.234	20.6961	878.49	84.7329	290.864	2272.87	2437.42	0	36.234	2085.24	801.437	20.6961	938.859	938.859	698.331																								14996.3
unsaturated fatty acid metabolic process	0	20.6961	1761.93	2196.14	538.395	617.376	928.936	36.234	276.898	120.967	675.817	1402.82	146.047	675.817	1141.36	938.859	249.96	315.944	775.545	1179.28	938.859																						14937.9
maintenance of location in cell	878.49	290.864	1268.11	311.56	84.7329	2437.42	1373.54	2196.38	1270.78	84.7329	1663.91	938.859	2133.31																														14932.7
ribose phosphate metabolic process	36.234	1579.18	290.864	2531.53	1552.77	2437.42	1270.78	938.859	1508.48	801.437	938.859	1023.59																															14910
icosanoid metabolic process	0	20.6961	1761.93	2196.14	538.395	617.376	928.936	36.234	276.898	120.967	86.68	675.817	1402.82	146.047	675.817	1141.36	20.6961	249.96	315.944	775.545	801.437	1179.28	938.859																				14907.8
lipid modification	1460.46	84.7329	2196.14	1888.99	617.376	0	1552.77	880.001	36.234	84.7329	938.859	724.752	1402.82	938.859	938.859	0	105.429	959.555																									14810.6
regulation of cytokine-mediated signaling pathway	1460.46	2535.92	938.859	36.234	290.864	837.671	20.6961	1653.38	1943.62	309.613	938.859	1653.38	20.6961	938.859	1215.76																												14794.9
regulation of response to cytokine stimulus	1460.46	2535.92	938.859	36.234	290.864	837.671	20.6961	1653.38	1943.62	309.613	938.859	1653.38	20.6961	938.859	1215.76																												14794.9
response to alkaloid	617.376	1460.46	20.6961	1316.14	880.001	20.6961	2196.38	84.7329	1579.18	1270.78	84.7329	3267.22	327.344	1663.91																													14789.7
regulation of neuron apoptotic process	84.7329	2535.92	2242.62	36.234	86.68	311.56	1579.18	675.817	20.6961	36.234	3267.22	36.234	801.437	1279.9	1665.86	25.08																											14685.4
neuron apoptotic process	84.7329	2535.92	2242.62	36.234	86.68	311.56	1579.18	675.817	20.6961	36.234	3267.22	36.234	801.437	1279.9	1665.86	25.08																											14685.4
organelle fission	928.936	2219.99	2531.53	704.056	3034.49	105.429	36.234	1589.51	938.859	84.7329	2508.56	0																															14682.3
positive regulation of blood vessel diameter	2242.62	2400.5	84.7329	938.859	1794.97	2085.24	3267.22	84.7329	1665.86	84.7329																																	14649.5
neutrophil degranulation	109.813	240.418	25.08	928.936	20.6961	84.7329	2196.14	290.864	617.376	1888.99	204.184	1004.13	675.817	1888.99	171.413	817.176	36.234	1508.48	20.6961	938.859	938.859																						14607.9
neutrophil activation involved in immune response	109.813	240.418	25.08	928.936	20.6961	84.7329	2196.14	290.864	617.376	1888.99	204.184	1004.13	675.817	1888.99	171.413	817.176	36.234	1508.48	20.6961	938.859	938.859																						14607.9
extrinsic apoptotic signaling pathway	617.376	2535.92	2242.62	290.864	675.817	0	20.6961	2437.42	1568.82	702.109	36.234	2111.14	1350.6																														14589.6
monovalent inorganic cation homeostasis	288.123	84.7329	538.395	2531.53	1888.99	1794.97	3267.22	2444.85	1663.91	84.7329																																	14587.5
membrane depolarization	86.68	1579.18	2219.99	2531.53	2437.42	3267.22	327.344	2133.31																																			14582.7
regulation of ATP metabolic process	36.234	1579.18	1552.77	2437.42	3034.49	1270.78	1589.51	938.859	2133.31																																		14572.6
ATP metabolic process	36.234	1579.18	1552.77	2437.42	3034.49	1270.78	1589.51	938.859	2133.31																																		14572.6
cyclic-nucleotide-mediated signaling	192.349	20.6961	880.001	105.429	1579.18	329.771	2085.24	36.234	944.474	3267.22	84.7329	192.349	1289.73	1663.91	1665.86	192.349																											14529.5
neuroinflammatory response	240.418	2535.92	0	290.864	2400.5	86.68	2531.53	2196.38	36.234	3267.22	938.859																																14524.6
positive regulation of smooth muscle cell proliferation	240.418	2535.92	0	2242.62	928.936	204.184	2400.5	86.68	675.817	1316.14	704.056	36.234	2081.34	1023.59																													14476.4
cardiocyte differentiation	2400.5	538.395	1552.77	1888.99	704.056	704.056	3034.49	675.817	1589.51	565.226	801.437																																14455.2
cellular response to biotic stimulus	617.376	574.629	25.08	36.234	20.6961	1556.98	1268.11	1888.99	538.395	1888.99	36.234	1568.82	938.859	105.429	20.6961	1215.76	2133.31																										14434.6
regulation of Wnt signaling pathway	2400.5	1888.99	938.859	675.817	2531.53	1568.82	378.086	84.7329	2508.56	107.376	1350.6																																14433.9
negative regulation of nervous system development	878.49	1592.47	675.817	2531.53	1316.14	1568.82	2196.38	84.7329	1387.28	2133.31																																	14365
response to hydrogen peroxide	2242.62	84.7329	862.952	86.68	2531.53	20.6961	1316.14	1373.54	704.056	3034.49	84.7329	84.7329	938.859	36.234	959.555																												14361.5
glial cell activation	2535.92	290.864	2400.5	86.68	2531.53	2196.38	36.234	3267.22	938.859																																		14284.2
histone modification	2535.92	84.7329	928.936	1556.98	538.395	2531.53	0	3034.49	84.7329	105.429	84.7329	1589.51	84.7329	84.7329	938.859	86.68																											14270.4
covalent chromatin modification	2535.92	84.7329	928.936	1556.98	538.395	2531.53	0	3034.49	84.7329	105.429	84.7329	1589.51	84.7329	84.7329	938.859	86.68																											14270.4
striated muscle cell proliferation	2535.92	1888.99	1888.99	702.109	3034.49	378.086	938.859	1589.51	565.226	698.331																																	14220.5
regulation of chemotaxis	938.859	928.936	20.6961	617.376	1888.99	862.952	538.395	2219.99	1888.99	84.7329	704.056	704.056	1387.28	36.234	724.752	36.234	617.376																										14199.9
leukocyte chemotaxis	20.6961	2196.14	617.376	1268.11	1888.99	751.336	538.395	1888.99	1387.28	36.234	724.752	36.234	1289.73	617.376	20.6961	801.437	0	105.429																									14189.2
activation of MAPKK activity	204.184	2535.92	2400.5	311.56	538.395	2531.53	1888.99	702.109	1794.97	1279.9																																	14188.1
response to insulin	617.376	1460.46	84.7329	938.859	84.7329	84.7329	1653.38	1579.18	1316.14	0	1552.77	45.7761	36.234	1568.82	538.395	84.7329	1653.38	86.68	801.437																								14187.8
regulation of protein localization to nucleus	2535.92	0	878.49	84.7329	1888.99	1579.18	675.817	0	1888.99	1568.82	3034.49	36.234																															14171.7
muscle organ development	1888.99	1552.77	1888.99	702.109	3034.49	378.086	1589.51	36.234	565.226	801.437	698.331	1023.59																															14159.8
negative regulation of protein transport	192.349	1653.38	311.56	2531.53	1579.18	1364.63	944.474	1663.91	1215.76	1665.86	1023.59																																14146.2
negative regulation of establishment of protein localization	192.349	1653.38	311.56	2531.53	1579.18	1364.63	944.474	1663.91	1215.76	1665.86	1023.59																																14146.2
olefinic compound metabolic process	0	1761.93	2196.14	538.395	617.376	928.936	36.234	276.898	120.967	675.817	1402.82	146.047	675.817	1141.36	249.96	315.944	775.545	1179.28	1084.36																								14123.8
purine ribonucleotide metabolic process	36.234	1579.18	290.864	2531.53	1552.77	2437.42	1270.78	938.859	1508.48	938.859	1023.59																																14108.6
ribonucleotide metabolic process	36.234	1579.18	290.864	2531.53	1552.77	2437.42	1270.78	938.859	1508.48	938.859	1023.59																																14108.6
regulation of protein catabolic process	574.629	2400.5	928.936	2531.53	325.151	1316.14	1568.82	171.413	1387.28	944.474	36.234	801.437	1023.59																														14010.1
regulation of nucleocytoplasmic transport	2535.92	0	84.7329	1888.99	1653.38	0	1888.99	1316.14	1568.82	3034.49																																	13971.4
positive regulation of cell cycle process	36.234	2400.5	928.936	675.817	0	1316.14	36.234	704.056	3034.49	378.086	1589.51	938.859	1663.91	192.349																													13895.1
eye development	36.234	2400.5	86.68	36.234	704.056	704.056	702.109	84.7329	675.817	84.7329	675.817	565.226	1491.71	1508.48	1663.91	107.376	1665.86	698.331																									13891.9
visual system development	36.234	2400.5	86.68	36.234	704.056	704.056	702.109	84.7329	675.817	84.7329	675.817	565.226	1491.71	1508.48	1663.91	107.376	1665.86	698.331																									13891.9
sensory system development	36.234	2400.5	86.68	36.234	704.056	704.056	702.109	84.7329	675.817	84.7329	675.817	565.226	1491.71	1508.48	1663.91	107.376	1665.86	698.331																									13891.9
negative regulation of apoptotic signaling pathway	617.376	240.418	0	2242.62	20.6961	36.234	675.817	2531.53	1316.14	1568.82	702.109	84.7329	36.234	1653.38	2111.14																												13837.2
receptor metabolic process	1460.46	2535.92	36.234	617.376	617.376	1552.77	84.7329	84.7329	1653.38	801.437	1491.71	20.6961	1663.91	1215.76																													13836.5
regulation of neurotransmitter transport	2531.53	880.001	1568.82	1270.78	2085.24	3267.22	36.234	84.7329	84.7329	327.344	1663.91																																13800.6
muscle cell differentiation	1888.99	20.6961	20.6961	1552.77	1316.14	704.056	704.056	3034.49	675.817	1589.51	84.7329	565.226	801.437	801.437																													13760.1
regulation of lipid transport	1460.46	20.6961	84.7329	837.671	1653.38	20.6961	2437.42	20.6961	1215.76	2923.61	2133.31	938.859																															13747.3
steroid biosynthetic process	158.118	1087.63	36.234	538.395	938.859	801.437	2923.61	2133.31	938.859	2081.34	1023.59	1084.36																															13745.8
excretion	2242.62	45.7761	2196.38	1794.97	2085.24	3267.22	36.234	327.344	1663.91	84.7329																																	13744.4
positive regulation of DNA-binding transcription factor activity	617.376	1460.46	2535.92	20.6961	36.234	84.7329	20.6961	938.859	1031.73	309.613	938.859	84.7329	107.376	1279.9	801.437	2111.14	1350.6																										13730.4
fatty acid biosynthetic process	0	20.6961	1761.93	2196.14	837.671	617.376	36.234	276.898	36.234	120.967	675.817	1402.82	146.047	675.817	938.859	249.96	1215.76	775.545	801.437	938.859																							13725.1
regulation of neurotransmitter secretion	2531.53	880.001	1568.82	1270.78	2085.24	3267.22	36.234	84.7329	327.344	1663.91																																	13715.8
placenta development	1460.46	0	158.118	36.234	2400.5	1888.99	538.395	1004.13	1888.99	938.859	1387.28	84.7329	565.226	1350.6																													13702.5
regulation of synaptic vesicle exocytosis	2531.53	880.001	1568.82	1270.78	2085.24	3267.22	84.7329	327.344	1663.91																																		13679.6
regulation of synaptic vesicle cycle	2531.53	880.001	1568.82	1270.78	2085.24	3267.22	84.7329	327.344	1663.91																																		13679.6
calcium ion transport into cytosol	878.49	290.864	1268.11	311.56	84.7329	2437.42	1373.54	2196.38	1270.78	84.7329	36.234	1663.91	938.859	801.437																													13637.1
cytosolic calcium ion transport	878.49	290.864	1268.11	311.56	84.7329	2437.42	1373.54	2196.38	1270.78	84.7329	36.234	1663.91	938.859	801.437																													13637.1
positive regulation of reactive oxygen species metabolic process	617.376	2535.92	0	878.49	84.7329	2400.5	1888.99	704.056	171.413	2196.38	20.6961	2133.31																															13631.9
regulation of cell growth	1460.46	84.7329	878.49	2400.5	1552.77	204.184	1031.73	1568.82	702.109	938.859	938.859	801.437	938.859	107.376																													13609.2
nucleotide biosynthetic process	574.629	0	2088.94	1579.18	290.864	1888.99	1542.94	2085.24	84.7329	84.7329	938.859	1508.48	938.859																														13606.5
nucleoside phosphate biosynthetic process	574.629	0	2088.94	1579.18	290.864	1888.99	1542.94	2085.24	84.7329	84.7329	938.859	1508.48	938.859																														13606.5
cell cycle G1/S phase transition	36.234	84.7329	2400.5	928.936	675.817	45.7761	0	1316.14	1542.94	36.234	592.296	3034.49	378.086	1589.51	938.859	0																											13600.6
regulation of peptidase activity	240.418	1460.46	2535.92	0	36.234	1888.99	311.56	538.395	675.817	1316.14	84.7329	3267.22	36.234	20.6961	192.349	25.08	959.555																										13589.8
negative regulation of transferase activity	1460.46	938.859	84.7329	290.864	1316.14	20.6961	1568.82	938.859	3267.22	1653.38	938.859	86.68	1023.59																														13589.2
regulation of striated muscle tissue development	1888.99	1552.77	1888.99	702.109	3034.49	378.086	1589.51	801.437	698.331	1023.59																																	13558.3
regulation of muscle tissue development	1888.99	1552.77	1888.99	702.109	3034.49	378.086	1589.51	801.437	698.331	1023.59																																	13558.3
regulation of muscle organ development	1888.99	1552.77	1888.99	702.109	3034.49	378.086	1589.51	801.437	698.331	1023.59																																	13558.3
cellular lipid catabolic process	84.7329	1552.77	880.001	938.859	817.176	938.859	724.752	675.817	1141.36	938.859	775.545	105.429	2081.34	959.555	938.859																												13553.9
positive regulation of phosphatidylinositol 3-kinase signaling	84.7329	2535.92	878.49	311.56	1316.14	2219.99	0	704.056	704.056	84.7329	938.859	1387.28	36.234	938.859	1279.9	0	105.429																										13526.2
tissue homeostasis	0	20.6961	2400.5	1653.38	311.56	2437.42	704.056	105.429	36.234	2444.85	592.296	20.6961	698.331	2081.34																													13506.8
response to tumor necrosis factor	617.376	2535.92	0	938.859	617.376	1888.99	20.6961	538.395	20.6961	1888.99	2196.38	938.859	309.613	938.859	20.6961																												13471.7
positive regulation of mitotic cell cycle	36.234	2400.5	928.936	1653.38	675.817	45.7761	1316.14	36.234	704.056	3034.49	105.429	1589.51	938.859																														13465.4
positive regulation of cell-cell adhesion	617.376	84.7329	928.936	36.234	84.7329	25.08	84.7329	617.376	2196.14	290.864	1653.38	84.7329	617.376	0	2272.87	1943.62	84.7329	36.234	801.437	20.6961	938.859																						13420.1
canonical Wnt signaling pathway	2400.5	1888.99	2531.53	1568.82	378.086	84.7329	675.817	2508.56	1350.6																																		13387.6
regulation of leukocyte mediated immunity	617.376	574.629	2242.62	36.234	84.7329	290.864	2272.87	2437.42	2085.24	801.437	20.6961	938.859	938.859																														13341.8
regulation of chromosome organization	84.7329	1556.98	1579.18	538.395	2531.53	1888.99	36.234	1589.51	84.7329	2508.56	938.859																																13337.7
regulation of ossification	192.349	36.234	2196.14	1888.99	1653.38	538.395	84.7329	1888.99	2437.42	378.086	1387.28	36.234	617.376																														13335.6
response to cadmium ion	240.418	2242.62	2400.5	1556.98	86.68	20.6961	538.395	675.817	1888.99	325.151	276.898	3034.49																															13287.6
intrinsic apoptotic signaling pathway	240.418	2535.92	0	938.859	2242.62	20.6961	36.234	84.7329	1579.18	2531.53	0	20.6961	1316.14	84.7329	1653.38																												13285.1
G1/S transition of mitotic cell cycle	36.234	84.7329	2400.5	928.936	675.817	45.7761	0	1316.14	1542.94	36.234	592.296	3034.49	1589.51	938.859	0																												13222.5
camera-type eye development	36.234	2400.5	86.68	36.234	704.056	704.056	702.109	84.7329	84.7329	675.817	565.226	1491.71	1508.48	1663.91	107.376	1665.86	698.331																										13216
response to estrogen	1460.46	36.234	2242.62	938.859	1888.99	1316.14	704.056	2444.85	2111.14																																		13143.4
cardiac muscle tissue growth	1888.99	1552.77	1888.99	702.109	3034.49	378.086	1589.51	36.234	565.226	801.437	698.331																																13136.2
heart growth	1888.99	1552.77	1888.99	702.109	3034.49	378.086	1589.51	36.234	565.226	801.437	698.331																																13136.2
positive regulation of leukocyte activation	84.7329	20.6961	36.234	20.6961	84.7329	25.08	84.7329	290.864	1653.38	84.7329	2531.53	0	2272.87	2085.24	84.7329	675.817	36.234	801.437	327.344	20.6961	938.859	938.859																					13099.5
regulation of generation of precursor metabolites and energy	574.629	84.7329	36.234	1552.77	2437.42	1568.82	3034.49	1270.78	1589.51	938.859																																	13088.3
long-chain fatty acid metabolic process	0	1761.93	2196.14	538.395	617.376	928.936	36.234	276.898	36.234	120.967	675.817	1402.82	146.047	675.817	1141.36	249.96	315.944	775.545	1179.28																								13075.7
organic hydroxy compound biosynthetic process	158.118	617.376	592.296	36.234	938.859	938.859	801.437	938.859	2923.61	938.859	2081.34	1023.59	1084.36																														13073.8
regulation of angiogenesis	1460.46	0	2242.62	36.234	2196.14	617.376	2219.99	675.817	204.184	1943.62	105.429	36.234	938.859	84.7329	192.349	113.511																											13067.6
regulation of vasculature development	1460.46	0	2242.62	36.234	2196.14	617.376	2219.99	675.817	204.184	1943.62	105.429	36.234	938.859	84.7329	192.349	113.511																											13067.6
embryonic organ development	36.234	2400.5	538.395	2219.99	1888.99	704.056	704.056	702.109	378.086	675.817	84.7329	675.817	698.331	1350.6																													13057.7
intracellular steroid hormone receptor signaling pathway	2535.92	2303.49	1579.18	938.859	1031.73	84.7329	2339.73	107.376	2111.14																																		13032.2
fatty acid transport	574.629	1460.46	20.6961	1552.77	45.7761	2437.42	938.859	938.859	675.817	20.6961	1663.91	801.437	959.555	938.859																													13029.8
regulation of T cell activation	84.7329	938.859	36.234	84.7329	25.08	84.7329	290.864	2088.94	1653.38	84.7329	0	20.6961	204.184	2272.87	84.7329	3267.22	36.234	801.437	20.6961	938.859																							13019.2
JNK cascade	192.349	20.6961	84.7329	2400.5	1556.98	1316.14	84.7329	325.151	36.234	2085.24	1888.99	1653.38	20.6961	1350.6																													13016.4
epithelial cell development	617.376	36.234	862.952	938.859	84.7329	1542.94	1568.82	675.817	36.234	309.613	675.817	1279.9	192.349	2111.14	2081.34																												13014.1
lipid homeostasis	1460.46	158.118	1268.11	837.671	1794.97	938.859	1402.82	1215.76	2923.61	938.859																																	12939.2
hexose metabolic process	84.7329	938.859	1888.99	938.859	1552.77	1568.82	938.859	347.794	801.437	86.68	698.331	2081.34	938.859																														12866.3
monosaccharide metabolic process	84.7329	938.859	1888.99	938.859	1552.77	1568.82	938.859	347.794	801.437	86.68	698.331	2081.34	938.859																														12866.3
regulation of organic acid transport	20.6961	2437.42	1794.97	3267.22	2401.19	20.6961	2923.61																																				12865.8
adenylate cyclase-activating G protein-coupled receptor signaling pathway	192.349	20.6961	880.001	105.429	1579.18	329.771	2085.24	36.234	944.474	3267.22	84.7329	192.349	1289.73	1663.91	192.349																												12863.7
cAMP-mediated signaling	192.349	20.6961	880.001	105.429	1579.18	329.771	2085.24	36.234	944.474	3267.22	84.7329	192.349	1289.73	1663.91	192.349																												12863.7
positive regulation of apoptotic signaling pathway	240.418	2535.92	938.859	84.7329	290.864	1556.98	325.151	1568.82	702.109	3267.22	1350.6																																12861.7
cellular response to ketone	617.376	1460.46	192.349	2400.5	2303.49	36.234	329.771	938.859	192.349	2111.14	2081.34	192.349																															12856.2
cellular response to lipopolysaccharide	617.376	574.629	25.08	36.234	20.6961	1556.98	1268.11	1888.99	538.395	1888.99	36.234	938.859	105.429	1215.76	2133.31																												12845.1
cellular response to molecule of bacterial origin	617.376	574.629	25.08	36.234	20.6961	1556.98	1268.11	1888.99	538.395	1888.99	36.234	938.859	105.429	1215.76	2133.31																												12845.1
regulation of ion transmembrane transport	240.418	20.6961	878.49	311.56	20.6961	84.7329	2437.42	1579.18	944.474	84.7329	0	36.234	1663.91	801.437	938.859	938.859	1665.86	84.7329	105.429																								12837.7
calcium ion transmembrane import into cytosol	878.49	290.864	1268.11	311.56	84.7329	2437.42	1373.54	2196.38	1270.78	84.7329	36.234	1663.91	938.859																														12835.6
cellular response to tumor necrosis factor	617.376	2535.92	938.859	1888.99	20.6961	538.395	1888.99	2196.38	938.859	309.613	938.859	20.6961																															12833.6
interaction with host	617.376	2400.5	1268.11	862.952	1004.13	1004.13	3034.49	1270.78	565.226	801.437																																	12829.1
response to light stimulus	36.234	0	928.936	36.234	2400.5	1556.98	1579.18	0	20.6961	1316.14	36.234	1888.99	327.344	1663.91	1023.59																												12815
positive regulation of binding	240.418	1460.46	2535.92	862.952	1579.18	675.817	2531.53	1568.82	1350.6																																		12805.7
release of sequestered calcium ion into cytosol	878.49	290.864	1268.11	311.56	84.7329	2437.42	1373.54	2196.38	1270.78	84.7329	1663.91	938.859																															12799.4
negative regulation of sequestering of calcium ion	878.49	290.864	1268.11	311.56	84.7329	2437.42	1373.54	2196.38	1270.78	84.7329	1663.91	938.859																															12799.4
regulation of sequestering of calcium ion	878.49	290.864	1268.11	311.56	84.7329	2437.42	1373.54	2196.38	1270.78	84.7329	1663.91	938.859																															12799.4
sequestering of calcium ion	878.49	290.864	1268.11	311.56	84.7329	2437.42	1373.54	2196.38	1270.78	84.7329	1663.91	938.859																															12799.4
arachidonic acid metabolic process	0	1761.93	2196.14	538.395	617.376	928.936	36.234	276.898	120.967	675.817	1402.82	146.047	675.817	1141.36	315.944	775.545	1179.28																										12789.5
84.7329ptive thermogenesis	2535.92	837.671	1316.14	2196.38	938.859	347.794	938.859	1491.71	20.6961	1215.76	938.859																																12778.6
adenylate cyclase-inhibiting G protein-coupled receptor signaling pathway	84.7329	84.7329	1579.18	1794.97	36.234	944.474	86.68	2401.19	1663.91	1665.86	2401.19																																12743.1
regulation of canonical Wnt signaling pathway	2400.5	1888.99	2531.53	1568.82	378.086	84.7329	2508.56	1350.6																																			12711.8
positive regulation of protein kinase B signaling	84.7329	2400.5	862.952	1653.38	1316.14	938.859	0	204.184	704.056	704.056	702.109	171.413	84.7329	1387.28	36.234	0	105.429	1350.6																									12706.6
learning or memory	0	1592.47	36.234	2400.5	86.68	20.6961	1888.99	880.001	1270.78	36.234	36.234	36.234	327.344	1663.91	1279.9	1023.59	113.511																										12693.3
muscle contraction	84.7329	0	228.583	20.6961	311.56	84.7329	2196.38	1270.78	1794.97	2085.24	84.7329	944.474	36.234	84.7329	0	938.859	327.344	1663.91	192.349	70.6936	84.7329	105.429																					12611.2
positive regulation of protein localization to nucleus	2535.92	0	878.49	84.7329	1888.99	1579.18	675.817	0	1888.99	3034.49	36.234																																12602.8
regulation of protein binding	240.418	84.7329	928.936	1556.98	862.952	538.395	675.817	2531.53	1552.77	1568.82	702.109	1350.6																															12594.1
synapse organization	1888.99	311.56	1316.14	2531.53	204.184	1387.28	36.234	36.234	1491.71	327.344	1663.91	1279.9	113.511																														12588.5
regulation of cardiac muscle tissue growth	1888.99	1552.77	1888.99	702.109	3034.49	378.086	1589.51	801.437	698.331																																		12534.7
regulation of heart growth	1888.99	1552.77	1888.99	702.109	3034.49	378.086	1589.51	801.437	698.331																																		12534.7
regulation of cardiac muscle tissue development	1888.99	1552.77	1888.99	702.109	3034.49	378.086	1589.51	801.437	698.331																																		12534.7
negative regulation of immune response	1460.46	938.859	2242.62	290.864	837.671	617.376	2272.87	1663.91	938.859	1215.76																																	12479.3
negative regulation of lipid localization	1460.46	938.859	837.671	1653.38	1552.77	938.859	1215.76	2923.61	938.859																																		12460.2
alcohol biosynthetic process	158.118	592.296	36.234	938.859	938.859	801.437	938.859	2923.61	938.859	2081.34	1023.59	1084.36																															12456.4
monoamine transport	1592.47	880.001	1270.78	944.474	3267.22	84.7329	2401.19	327.344	20.6961	1663.91																																	12452.8
striated muscle cell differentiation	1888.99	20.6961	20.6961	1552.77	704.056	704.056	3034.49	675.817	1589.51	84.7329	565.226	801.437	801.437																														12443.9
regulation of muscle system process	0	228.583	311.56	1579.18	84.7329	1552.77	105.429	1387.28	1794.97	2085.24	84.7329	944.474	36.234	84.7329	0	938.859	801.437	192.349	84.7329	105.429																							12402.7
negative regulation of organelle organization	84.7329	862.952	1579.18	2531.53	36.234	1589.51	36.234	2508.56	938.859	86.68	2133.31																																12387.8
response to ethanol	617.376	36.234	1542.94	880.001	3034.49	84.7329	1579.18	36.234	327.344	1663.91	801.437	698.331	1023.59																														12325.8
positive regulation of nucleocytoplasmic transport	2535.92	0	84.7329	1888.99	0	1888.99	1316.14	1568.82	3034.49																																		12318.1
regulation of DNA binding	240.418	1460.46	2535.92	2242.62	1556.98	86.68	1579.18	84.7329	2508.56																																		12295.6
renal system process	311.56	2196.38	1794.97	538.395	3267.22	0	327.344	1663.91	84.7329	2081.34																																	12265.9
entry into host	617.376	2400.5	1268.11	862.952	1004.13	1004.13	3034.49	1270.78	801.437																																		12263.9
movement in host environment	617.376	2400.5	1268.11	862.952	1004.13	1004.13	3034.49	1270.78	801.437																																		12263.9
negative regulation of neuron apoptotic process	84.7329	2535.92	2242.62	36.234	86.68	311.56	675.817	36.234	3267.22	36.234	1279.9	1665.86																															12259
epithelial cell migration	240.418	1460.46	84.7329	0	2242.62	36.234	862.952	86.68	1653.38	2219.99	702.109	938.859	105.429	36.234	1387.28	192.349																											12249.7
epithelium migration	240.418	1460.46	84.7329	0	2242.62	36.234	862.952	86.68	1653.38	2219.99	702.109	938.859	105.429	36.234	1387.28	192.349																											12249.7
tissue migration	240.418	1460.46	84.7329	0	2242.62	36.234	862.952	86.68	1653.38	2219.99	702.109	938.859	105.429	36.234	1387.28	192.349																											12249.7
ameboidal-type cell migration	240.418	1460.46	84.7329	0	2242.62	36.234	862.952	86.68	1653.38	2219.99	702.109	938.859	105.429	36.234	1387.28	192.349																											12249.7
smooth muscle contraction	0	228.583	311.56	84.7329	2196.38	1270.78	1794.97	2085.24	84.7329	944.474	36.234	938.859	327.344	1663.91	192.349	84.7329																											12244.9
in utero embryonic development	36.234	2400.5	1888.99	704.056	704.056	84.7329	702.109	1589.51	84.7329	565.226	2111.14	1350.6																															12221.9
negative regulation of neurogenesis	878.49	1592.47	675.817	2531.53	1316.14	1568.82	84.7329	1387.28	2133.31																																		12168.6
protein import	2535.92	0	84.7329	1888.99	2531.53	0	1888.99	171.413	3034.49	20.6961																																	12156.8
negative regulation of cytokine production	192.349	2242.62	20.6961	928.936	36.234	878.49	290.864	2088.94	2272.87	938.859	2133.31	113.511																															12137.7
protein maturation	25.08	1579.18	204.184	2531.53	20.6961	1316.14	1004.13	2437.42	0	86.68	2923.61																																12128.6
negative regulation of cellular catabolic process	84.7329	2242.62	1888.99	862.952	2531.53	880.001	1387.28	2133.31	105.429																																		12116.8
glutamate secretion	2437.42	2196.38	1794.97	3267.22	2401.19																																						12097.2
acidic amino acid transport	2437.42	2196.38	1794.97	3267.22	2401.19																																						12097.2
dicarboxylic acid transport	2437.42	2196.38	1794.97	3267.22	2401.19																																						12097.2
animal organ regeneration	1460.46	36.234	2242.62	2400.5	928.936	1542.94	36.234	3034.49	378.086	36.234																																	12096.7
reactive oxygen species biosynthetic process	109.813	617.376	574.629	2535.92	0	2196.14	276.898	171.413	2196.38	84.7329	36.234	938.859	192.349	2133.31																													12064.1
protein processing	25.08	1579.18	204.184	2531.53	20.6961	1316.14	1004.13	2437.42	0	2923.61																																	12042
ERBB signaling pathway	240.418	204.184	84.7329	938.859	2400.5	1653.38	0	1888.99	204.184	171.413	105.429	1387.28	1794.97	944.474																													12018.8
protein import into nucleus	2535.92	0	84.7329	1888.99	2531.53	0	1888.99	3034.49	20.6961																																		11985.3
import into nucleus	2535.92	0	84.7329	1888.99	2531.53	0	1888.99	3034.49	20.6961																																		11985.3
small molecule catabolic process	574.629	2088.94	290.864	1552.77	880.001	938.859	84.7329	347.794	84.7329	1141.36	928.936	2081.34	959.555																														11954.5
secondary alcohol metabolic process	36.234	276.898	36.234	938.859	817.176	120.967	1402.82	565.226	938.859	801.437	2923.61	938.859	1023.59	1084.36																													11905.1
negative regulation of growth	1460.46	1592.47	36.234	1552.77	1031.73	938.859	1387.28	801.437	938.859	107.376	698.331	1350.6																															11896.4
negative regulation of mitotic cell cycle	36.234	2400.5	928.936	0	1316.14	36.234	3034.49	36.234	1589.51	2508.56																																	11886.8
acute inflammatory response	617.376	1460.46	0	928.936	36.234	878.49	617.376	84.7329	880.001	2196.38	1579.18	1794.97	675.817	105.429																													11855.4
lymphocyte proliferation	20.6961	20.6961	84.7329	25.08	84.7329	84.7329	290.864	2088.94	290.864	84.7329	20.6961	204.184	2272.87	2437.42	84.7329	36.234	801.437	1508.48	327.344	20.6961	938.859	105.429																					11834.5
mononuclear cell proliferation	20.6961	20.6961	84.7329	25.08	84.7329	84.7329	290.864	2088.94	290.864	84.7329	20.6961	204.184	2272.87	2437.42	84.7329	36.234	801.437	1508.48	327.344	20.6961	938.859	105.429																					11834.5
positive regulation of peptidyl-tyrosine phosphorylation	617.376	2535.92	20.6961	290.864	1653.38	84.7329	84.7329	1270.78	1794.97	944.474	36.234	1653.38	801.437	20.6961																													11809.7
regulation of DNA metabolic process	1460.46	84.7329	84.7329	84.7329	290.864	2400.5	1579.18	538.395	1888.99	0	704.056	171.413	2508.56																														11796.6
locomotory behavior	2088.94	290.864	2531.53	1579.18	3267.22	327.344	1663.91																																				11749
regulation of cellular ketone metabolic process	1460.46	0	837.671	1552.77	880.001	938.859	1215.76	2923.61	959.555	938.859																																	11707.5
response to endoplasmic reticulum stress	36.234	938.859	2196.14	86.68	837.671	617.376	2531.53	0	1568.82	1653.38	1215.76																																11682.4
regulation of hemopoiesis	938.859	20.6961	36.234	84.7329	36.234	84.7329	290.864	1888.99	86.68	0	204.184	2272.87	105.429	84.7329	84.7329	675.817	2444.85	592.296	84.7329	617.376	20.6961	938.859	86.68																				11681.3
regulation of endocytosis	1460.46	617.376	837.671	617.376	2531.53	84.7329	938.859	1653.38	20.6961	1663.91	1215.76																																11641.8
negative regulation of synaptic transmission	0	1592.47	2531.53	1270.78	1794.97	1289.73	1491.71	1663.91																																			11635.1
viral life cycle	617.376	2400.5	1268.11	1004.13	1004.13	3034.49	36.234	1270.78	801.437	192.349																																	11629.5
negative regulation of protein secretion	192.349	1653.38	311.56	1579.18	1364.63	944.474	1663.91	1215.76	1665.86	1023.59																																	11614.7
negative regulation of peptide secretion	192.349	1653.38	311.56	1579.18	1364.63	944.474	1663.91	1215.76	1665.86	1023.59																																	11614.7
positive regulation of chemotaxis	617.376	1888.99	862.952	538.395	2219.99	1888.99	84.7329	704.056	1387.28	36.234	724.752	36.234	617.376																														11607.4
negative regulation of ion transport	617.376	240.418	0	20.6961	20.6961	880.001	1270.78	1794.97	944.474	84.7329	2401.19	1663.91	1665.86																														11605.1
regulation of systemic arterial blood pressure	25.08	311.56	2196.38	1794.97	538.395	1663.91	2923.61	2111.14																																			11565.1
regulation of cell cycle phase transition	36.234	2400.5	928.936	675.817	0	1316.14	36.234	171.413	3034.49	378.086	1589.51	938.859																															11506.2
cellular response to insulin stimulus	1460.46	84.7329	938.859	84.7329	84.7329	1653.38	1579.18	1316.14	0	45.7761	36.234	1568.82	84.7329	1653.38	86.68	801.437																											11479.3
heart process	84.7329	2535.92	1565.71	1316.14	2196.38	1794.97	84.7329	84.7329	0	36.234	1663.91	105.429																															11468.9
positive regulation of transmembrane transport	204.184	878.49	1888.99	1653.38	311.56	675.817	0	84.7329	2437.42	84.7329	2444.85	0	801.437																														11465.6
myeloid cell homeostasis	2535.92	938.859	2242.62	36.234	617.376	1888.99	20.6961	2272.87	84.7329	801.437	0																																11439.7
heart contraction	84.7329	2535.92	1565.71	1316.14	2196.38	1794.97	84.7329	84.7329	0	1663.91	105.429																																11432.7
negative regulation of hydrolase activity	240.418	0	2531.53	1316.14	1568.82	3267.22	84.7329	309.613	938.859	192.349	959.555																																11409.2
viral entry into host cell	617.376	2400.5	1268.11	1004.13	1004.13	3034.49	1270.78	801.437																																			11400.9
renal system development	240.418	617.376	2531.53	704.056	704.056	702.109	675.817	2444.85	698.331	2081.34																																	11399.9
positive regulation of developmental growth	1888.99	1888.99	3034.49	378.086	938.859	1589.51	1663.91																																				11382.8
regulation of heart contraction	2535.92	1565.71	1316.14	2196.38	1794.97	84.7329	84.7329	0	1663.91	105.429																																	11347.9
regulation of synaptic transmission, GABAergic	880.001	1794.97	3267.22	2444.85	1289.73	1663.91																																					11340.7
synaptic transmission, GABAergic	880.001	1794.97	3267.22	2444.85	1289.73	1663.91																																					11340.7
regulation of cell cycle G1/S phase transition	36.234	2400.5	928.936	675.817	0	1316.14	36.234	3034.49	378.086	1589.51	938.859																																11334.8
response to axon injury	2535.92	86.68	592.296	3034.49	1663.91	1279.9	2133.31																																				11326.5
negative regulation of leukocyte cell-cell adhesion	938.859	2088.94	20.6961	1552.77	204.184	2272.87	3267.22	938.859																																			11284.4
regulation of stress-activated MAPK cascade	20.6961	84.7329	2400.5	538.395	1316.14	1888.99	36.234	938.859	1653.38	20.6961	1350.6	1023.59																															11272.8
regulation of stress-activated protein kinase signaling cascade	20.6961	84.7329	2400.5	538.395	1316.14	1888.99	36.234	938.859	1653.38	20.6961	1350.6	1023.59																															11272.8
purinergic nucleotide receptor signaling pathway	1565.71	2437.42	1794.97	2085.24	84.7329	3267.22																																					11235.3
regulation of mitochondrion organization	240.418	36.234	1556.98	2219.99	2531.53	1568.82	2133.31	938.859																																			11226.2
isoprenoid metabolic process	2400.5	36.234	276.898	36.234	938.859	120.967	347.794	698.331	2081.34	1179.28	1023.59	2081.34																															11221.4
morphogenesis of a branching structure	158.118	862.952	2219.99	938.859	2531.53	84.7329	84.7329	565.226	1663.91	2111.14																																	11221.2
lipid oxidation	1460.46	2196.14	1888.99	617.376	1552.77	880.001	938.859	724.752	959.555																																		11218.9
anatomical structure maturation	1460.46	204.184	36.234	928.936	2531.53	1542.94	1589.51	36.234	801.437	2081.34																																	11212.8
developmental maturation	1460.46	204.184	36.234	928.936	2531.53	1542.94	1589.51	36.234	801.437	2081.34																																	11212.8
regulation of endopeptidase activity	240.418	1460.46	2535.92	0	36.234	311.56	675.817	1316.14	84.7329	3267.22	36.234	20.6961	192.349	25.08	959.555																												11162.4
response to purine-containing compound	1460.46	0	1592.47	2437.42	2196.38	84.7329	3267.22	0	105.429																																		11144.1
regulation of mitotic cell cycle phase transition	36.234	2400.5	928.936	675.817	0	1316.14	36.234	171.413	3034.49	1589.51	938.859																																11128.1
maternal process involved in female pregnancy	0	158.118	538.395	938.859	1004.13	1888.99	880.001	938.859	565.226	2111.14	2081.34																																11105.1
regulation of leukocyte proliferation	20.6961	20.6961	84.7329	25.08	290.864	2088.94	538.395	84.7329	20.6961	1888.99	204.184	2272.87	1387.28	84.7329	801.437	327.344	20.6961	938.859																									11101.2
cholesterol metabolic process	36.234	276.898	36.234	938.859	120.967	1402.82	565.226	938.859	801.437	2923.61	938.859	1023.59	1084.36																														11088
sterol metabolic process	36.234	276.898	36.234	938.859	120.967	1402.82	565.226	938.859	801.437	2923.61	938.859	1023.59	1084.36																														11088
axonogenesis	84.7329	84.7329	1653.38	538.395	0	1888.99	204.184	1568.82	171.413	84.7329	105.429	1387.28	36.234	327.344	1663.91	1279.9	0																										11079.5
establishment of organelle localization	2242.62	36.234	84.7329	2531.53	1387.28	1589.51	2085.24	20.6961	938.859	0	105.429																																11022.1
fat cell differentiation	1460.46	36.234	0	2196.14	1888.99	938.859	938.859	1270.78	938.859	1350.6																																	11019.8
regulation of reactive oxygen species biosynthetic process	617.376	2535.92	0	2196.14	171.413	2196.38	36.234	938.859	192.349	2133.31																																	11018
cell maturation	1460.46	36.234	928.936	2531.53	1542.94	1589.51	801.437	2081.34																																			10972.4
regulation of G1/S transition of mitotic cell cycle	36.234	2400.5	928.936	675.817	0	1316.14	36.234	3034.49	1589.51	938.859																																	10956.7
regulation of mitochondrial depolarization	1579.18	2219.99	2531.53	2437.42	2133.31																																						10901.4
mitochondrial depolarization	1579.18	2219.99	2531.53	2437.42	2133.31																																						10901.4
regulation of membrane depolarization	1579.18	2219.99	2531.53	2437.42	2133.31																																						10901.4
regulation of cysteine-type endopeptidase activity	240.418	1460.46	2535.92	0	36.234	311.56	675.817	1316.14	3267.22	36.234	20.6961	25.08	959.555																														10885.3
positive regulation of leukocyte cell-cell adhesion	617.376	84.7329	928.936	36.234	84.7329	25.08	84.7329	617.376	2196.14	290.864	1653.38	84.7329	0	2272.87	84.7329	36.234	801.437	20.6961	938.859																								10859.1
regulation of cysteine-type endopeptidase activity involved in apoptotic process	240.418	1460.46	2535.92	0	36.234	311.56	675.817	1316.14	3267.22	20.6961	25.08	959.555																															10849.1
positive regulation of epithelial cell proliferation	36.234	2242.62	36.234	2400.5	86.68	2219.99	592.296	204.184	702.109	105.429	36.234	36.234	2111.14																														10809.9
regulation of lipid storage	1460.46	938.859	837.671	1552.77	938.859	1215.76	2923.61	938.859																																			10806.9
lipid storage	1460.46	938.859	837.671	1552.77	938.859	1215.76	2923.61	938.859																																			10806.9
response to starvation	1460.46	1556.98	86.68	538.395	2531.53	1552.77	1888.99	249.96	938.859																																		10804.6
myeloid leukocyte differentiation	240.418	1460.46	938.859	1888.99	86.68	1579.18	0	105.429	2444.85	592.296	801.437	617.376	0																														10756
regulation of catecholamine secretion	880.001	1270.78	944.474	3267.22	2401.19	327.344	1663.91																																				10754.9
catecholamine secretion	880.001	1270.78	944.474	3267.22	2401.19	327.344	1663.91																																				10754.9
catecholamine transport	880.001	1270.78	944.474	3267.22	2401.19	327.344	1663.91																																				10754.9
astrocyte differentiation	878.49	2400.5	1653.38	538.395	84.7329	1888.99	36.234	3267.22																																			10747.9
cardiac muscle cell proliferation	1888.99	1888.99	702.109	3034.49	378.086	1589.51	565.226	698.331																																			10745.7
epithelial tube morphogenesis	158.118	36.234	617.376	862.952	2219.99	938.859	20.6961	84.7329	84.7329	675.817	1579.18	2111.14	1350.6																														10740.4
erythrocyte homeostasis	2535.92	938.859	2242.62	36.234	1888.99	20.6961	2272.87	801.437																																			10737.6
kidney development	240.418	617.376	2531.53	704.056	704.056	702.109	675.817	2444.85	2081.34																																		10701.6
DNA biosynthetic process	1460.46	84.7329	84.7329	538.395	675.817	1888.99	1542.94	704.056	171.413	938.859	2508.56																																10599
cold-induced thermogenesis	2535.92	837.671	1316.14	938.859	347.794	938.859	1491.71	20.6961	1215.76	938.859																																	10582.3
regulation of cold-induced thermogenesis	2535.92	837.671	1316.14	938.859	347.794	938.859	1491.71	20.6961	1215.76	938.859																																	10582.3
negative regulation of protein kinase activity	938.859	84.7329	290.864	1316.14	20.6961	938.859	3267.22	1653.38	938.859	86.68	1023.59																																10559.9
negative regulation of kinase activity	938.859	84.7329	290.864	1316.14	20.6961	938.859	3267.22	1653.38	938.859	86.68	1023.59																																10559.9
regulation of purine nucleotide metabolic process	574.629	36.234	1579.18	1552.77	2437.42	1270.78	2085.24	84.7329	938.859																																		10559.9
regulation of nucleotide metabolic process	574.629	36.234	1579.18	1552.77	2437.42	1270.78	2085.24	84.7329	938.859																																		10559.9
macrophage activation	2535.92	20.6961	290.864	86.68	2531.53	2196.38	36.234	675.817	938.859	20.6961	1215.76																																10549.4
epithelial cell apoptotic process	617.376	2535.92	2242.62	2219.99	675.817	801.437	105.429	1350.6																																			10549.2
cellular hormone metabolic process	938.859	704.056	36.234	276.898	36.234	120.967	347.794	698.331	2133.31	2081.34	1084.36	2081.34																															10539.7
cellular response to hydrogen peroxide	84.7329	862.952	2531.53	1316.14	704.056	3034.49	84.7329	938.859	959.555																																		10517
connective tissue development	84.7329	36.234	1888.99	1653.38	538.395	938.859	84.7329	1542.94	36.234	704.056	702.109	938.859	675.817	675.817																													10501.2
DNA integrity checkpoint	36.234	928.936	1888.99	1653.38	0	1316.14	3034.49	36.234	1589.51																																		10483.9
cell cycle checkpoint	36.234	928.936	1888.99	1653.38	0	1316.14	3034.49	36.234	1589.51																																		10483.9
regulation of steroid metabolic process	158.118	938.859	1402.82	938.859	2923.61	2133.31	938.859	1023.59																																			10458
DNA damage checkpoint	36.234	928.936	1888.99	1653.38	0	1316.14	3034.49	1589.51																																			10447.7
glucose metabolic process	84.7329	938.859	1888.99	938.859	1552.77	1568.82	938.859	801.437	86.68	698.331	938.859																																10437.2
regulation of synaptic plasticity	0	1888.99	1568.82	1794.97	36.234	3267.22	1663.91	113.511																																			10333.7
regulation of cation transmembrane transport	240.418	20.6961	878.49	311.56	20.6961	84.7329	1579.18	944.474	84.7329	0	36.234	1663.91	801.437	938.859	938.859	1665.86	105.429																										10315.6
long-term synaptic potentiation	1888.99	1568.82	1794.97	3267.22	1663.91	113.511																																					10297.4
tissue remodeling	158.118	204.184	36.234	2400.5	311.56	1316.14	2437.42	105.429	36.234	36.234	2444.85	592.296	20.6961	192.349																													10292.2
sex differentiation	617.376	36.234	1653.38	938.859	20.6961	704.056	704.056	702.109	817.176	1279.9	698.331	2111.14																															10283.3
endocrine system development	538.395	1888.99	704.056	1568.82	704.056	702.109	378.086	1663.91	2133.31																																		10281.7
positive regulation of immune effector process	574.629	2242.62	20.6961	36.234	20.6961	84.7329	290.864	2437.42	2085.24	801.437	20.6961	938.859	698.331																														10252.5
positive regulation of DNA metabolic process	84.7329	84.7329	290.864	2400.5	1579.18	538.395	1888.99	0	704.056	171.413	2508.56																																10251.4
response to amine	617.376	290.864	3034.49	84.7329	3267.22	1289.73	1663.91																																				10248.3
cellular response to oxygen levels	617.376	1460.46	0	2242.62	36.234	675.817	84.7329	1316.14	938.859	1589.51	105.429	192.349	25.08	959.555																													10244.2
cellular response to interferon-gamma	617.376	574.629	1460.46	2535.92	938.859	25.08	84.7329	837.671	1943.62	1215.76																																	10234.1
response to interferon-gamma	617.376	574.629	1460.46	2535.92	938.859	25.08	84.7329	837.671	1943.62	1215.76																																	10234.1
positive regulation of lipase activity	617.376	2400.5	837.671	938.859	704.056	704.056	84.7329	1270.78	36.234	592.296	1215.76	801.437																															10203.8
regulation of lipase activity	617.376	2400.5	837.671	938.859	704.056	704.056	84.7329	1270.78	36.234	592.296	1215.76	801.437																															10203.8
terpenoid metabolic process	2400.5	36.234	276.898	36.234	938.859	120.967	347.794	698.331	2081.34	1179.28	2081.34																																10197.8
collagen metabolic process	240.418	1460.46	204.184	204.184	878.49	36.234	311.56	1004.13	675.817	1004.13	2437.42	704.056	938.859	84.7329																													10184.7
regulation of cardiac muscle cell proliferation	1888.99	1888.99	702.109	3034.49	378.086	1589.51	698.331																																				10180.5
positive regulation of chromosome organization	84.7329	538.395	2531.53	1888.99	1589.51	84.7329	2508.56	938.859																																			10165.3
negative regulation of blood vessel diameter	617.376	0	1592.47	2400.5	311.56	84.7329	84.7329	1270.78	1794.97	36.234	944.474	1023.59																															10161.4
response to vitamin	1460.46	36.234	0	158.118	2400.5	84.7329	1316.14	1542.94	938.859	84.7329	2133.31																																10156
negative regulation of hormone secretion	1653.38	1794.97	1364.63	944.474	36.234	1663.91	1665.86	1023.59																																			10147.1
sleep	1270.78	1794.97	84.7329	3267.22	327.344	1663.91	1665.86																																				10074.8
response to nicotine	2242.62	20.6961	1552.77	1888.99	880.001	84.7329	327.344	1663.91	1279.9	113.511																																	10054.5
regulation of fat cell differentiation	1460.46	0	2196.14	1888.99	938.859	938.859	1270.78	1350.6																																			10044.7
leukocyte apoptotic process	20.6961	84.7329	36.234	617.376	1268.11	2088.94	20.6961	2272.87	1004.13	2437.42	84.7329	84.7329	0																														10020.7
forebrain development	36.234	2400.5	290.864	2531.53	20.6961	1568.82	378.086	675.817	84.7329	36.234	327.344	1663.91																															10014.8
positive regulation of hormone secretion	2535.92	36.234	2400.5	1653.38	84.7329	938.859	1663.91	698.331																																			10011.9
electron transport chain	2088.94	276.898	3034.49	1589.51	928.936	2081.34																																					10000.1
positive regulation of neurogenesis	1460.46	36.234	84.7329	880.001	84.7329	675.817	1579.18	84.7329	36.234	1663.91	1279.9	2133.31																															9999.25
positive regulation of protein catabolic process	928.936	2531.53	325.151	1316.14	1568.82	171.413	1387.28	944.474	801.437																																		9975.18
negative regulation of cell migration	1460.46	192.349	2242.62	20.6961	1565.71	938.859	1794.97	84.7329	1663.91																																		9964.3
regulation of nervous system process	311.56	2531.53	1579.18	1794.97	192.349	1665.86	775.545	113.511	938.859																																		9903.37
regulation of glutamate secretion	2437.42	1794.97	3267.22	2401.19																																							9900.8
regulation of amino acid transport	2437.42	1794.97	3267.22	2401.19																																							9900.8
mitotic nuclear division	928.936	704.056	3034.49	105.429	1589.51	938.859	84.7329	2508.56																																			9894.58
negative regulation of lipid storage	1460.46	938.859	837.671	1552.77	938.859	1215.76	2923.61																																				9867.99
regulation of cholesterol storage	1460.46	837.671	1552.77	938.859	1215.76	2923.61	938.859																																				9867.99
cholesterol storage	1460.46	837.671	1552.77	938.859	1215.76	2923.61	938.859																																				9867.99
positive regulation of leukocyte migration	617.376	928.936	617.376	617.376	1888.99	538.395	1888.99	1387.28	36.234	724.752	617.376																																9863.08
positive regulation of striated muscle tissue development	1888.99	1888.99	3034.49	378.086	1589.51	1023.59																																					9803.66
positive regulation of muscle organ development	1888.99	1888.99	3034.49	378.086	1589.51	1023.59																																					9803.66
positive regulation of muscle tissue development	1888.99	1888.99	3034.49	378.086	1589.51	1023.59																																					9803.66
positive regulation of calcium ion transport	878.49	311.56	84.7329	84.7329	2437.42	704.056	617.376	801.437	938.859	2133.31	801.437																																9793.41
xenobiotic metabolic process	1761.93	1268.11	938.859	928.936	36.234	276.898	36.234	120.967	315.944	2923.61	1179.28																																9787
cellular response to xenobiotic stimulus	1761.93	1268.11	938.859	928.936	36.234	276.898	36.234	120.967	315.944	2923.61	1179.28																																9787
response to xenobiotic stimulus	1761.93	1268.11	938.859	928.936	36.234	276.898	36.234	120.967	315.944	2923.61	1179.28																																9787
cell-substrate adhesion	2535.92	25.08	2219.99	204.184	617.376	0	1568.82	84.7329	938.859	1387.28	192.349																																9774.59
regulation of protein stability	84.7329	928.936	675.817	2531.53	0	20.6961	1888.99	1316.14	171.413	801.437	1350.6																																9770.29
regulation of behavior	880.001	84.7329	1794.97	84.7329	3267.22	327.344	1663.91	1665.86																																			9768.77
negative regulation of T cell activation	938.859	2088.94	20.6961	204.184	2272.87	3267.22	938.859																																				9731.63
negative regulation of lymphocyte activation	938.859	2088.94	20.6961	204.184	2272.87	3267.22	938.859																																				9731.63
cholesterol homeostasis	158.118	1268.11	837.671	938.859	1402.82	1215.76	2923.61	938.859																																			9683.8
sterol homeostasis	158.118	1268.11	837.671	938.859	1402.82	1215.76	2923.61	938.859																																			9683.8
regulation of fibroblast proliferation	1460.46	20.6961	2400.5	86.68	938.859	36.234	704.056	704.056	1589.51	938.859	801.437																																9681.35
fibroblast proliferation	1460.46	20.6961	2400.5	86.68	938.859	36.234	704.056	704.056	1589.51	938.859	801.437																																9681.35
regulation of oxidoreductase activity	158.118	36.234	2400.5	675.817	2531.53	880.001	592.296	171.413	1289.73	938.859																																	9674.5
regulation of protein-containing complex assembly	617.376	204.184	192.349	84.7329	862.952	837.671	1653.38	1579.18	938.859	617.376	325.151	1568.82	171.413	20.6961																													9674.13
interferon-gamma-mediated signaling pathway	617.376	1460.46	2535.92	938.859	25.08	84.7329	837.671	1943.62	1215.76																																		9659.48
epidermal growth factor receptor signaling pathway	240.418	204.184	84.7329	938.859	2400.5	1653.38	0	1387.28	1794.97	944.474																																	9648.79
myeloid leukocyte migration	192.349	20.6961	617.376	1888.99	538.395	1888.99	1387.28	36.234	724.752	801.437	617.376	20.6961	801.437	0	105.429																												9641.44
cardiac muscle cell differentiation	1552.77	704.056	704.056	3034.49	675.817	1589.51	565.226	801.437																																			9627.37
negative regulation of protein binding	84.7329	928.936	1556.98	862.952	538.395	2531.53	1552.77	1568.82																																			9625.13
regulation of extrinsic apoptotic signaling pathway	617.376	2242.62	290.864	675.817	1568.82	702.109	36.234	2111.14	1350.6																																		9595.58
Ras protein signal transduction	2535.92	84.7329	1888.99	862.952	86.68	20.6961	311.56	84.7329	0	704.056	944.474	592.296	1279.9	192.349																													9589.34
cellular response to cadmium ion	240.418	2242.62	2400.5	1556.98	86.68	20.6961	538.395	1888.99	325.151	276.898																																	9577.33
negative regulation of cell cycle process	36.234	20.6961	928.936	0	1316.14	36.234	3034.49	1589.51	2508.56	86.68																																	9557.48
84.7329ptive immune response based on somatic recombination of immune receptors built from immunoglobulin superfamily domains	617.376	36.234	84.7329	84.7329	290.864	290.864	938.859	2272.87	2437.42	0	84.7329	675.817	801.437	938.859																													9554.8
glycerophospholipid metabolic process	84.7329	837.671	617.376	0	704.056	84.7329	1270.78	724.752	675.817	1491.71	1215.76	801.437	0	105.429	938.859																												9553.11
regulation of receptor signaling pathway via JAK-STAT	2535.92	938.859	878.49	290.864	311.56	84.7329	2272.87	84.7329	36.234	2081.34																																	9515.6
regulation of receptor signaling pathway via STAT	2535.92	938.859	878.49	290.864	311.56	84.7329	2272.87	84.7329	36.234	2081.34																																	9515.6
receptor signaling pathway via JAK-STAT	2535.92	938.859	878.49	290.864	311.56	84.7329	2272.87	84.7329	36.234	2081.34																																	9515.6
receptor signaling pathway via STAT	2535.92	938.859	878.49	290.864	311.56	84.7329	2272.87	84.7329	36.234	2081.34																																	9515.6
regulation of sterol transport	1460.46	837.671	1215.76	2923.61	2133.31	938.859																																					9509.67
sterol transport	1460.46	837.671	1215.76	2923.61	2133.31	938.859																																					9509.67
T cell proliferation	84.7329	25.08	84.7329	290.864	2088.94	84.7329	20.6961	204.184	2272.87	2437.42	36.234	801.437	20.6961	938.859	105.429																												9496.91
respiratory system development	2400.5	538.395	1087.63	1888.99	704.056	704.056	276.898	378.086	36.234	84.7329	675.817	698.331																															9473.73
positive regulation of cell cycle phase transition	36.234	2400.5	675.817	1316.14	36.234	3034.49	378.086	1589.51																																			9467.01
positive regulation of protein import into nucleus	2535.92	0	84.7329	1888.99	0	1888.99	3034.49																																				9433.12
positive regulation of protein import	2535.92	0	84.7329	1888.99	0	1888.99	3034.49																																				9433.12
regulation of protein import into nucleus	2535.92	0	84.7329	1888.99	0	1888.99	3034.49																																				9433.12
regulation of protein import	2535.92	0	84.7329	1888.99	0	1888.99	3034.49																																				9433.12
multicellular organismal response to stress	228.583	2088.94	1373.54	2196.38	84.7329	1279.9	2133.31																																				9385.39
regulation of response to endoplasmic reticulum stress	938.859	2196.14	837.671	2531.53	0	1653.38	1215.76																																				9373.33
postsynaptic signal transduction	2535.92	1579.18	2401.19	327.344	113.511	2401.19																																					9358.33
cellular response to starvation	1556.98	86.68	538.395	2531.53	1552.77	1888.99	249.96	938.859																																			9344.17
acid secretion	84.7329	2437.42	2196.38	36.234	0	1663.91	2923.61																																				9342.29
phospholipase C-activating G protein-coupled receptor signaling pathway	878.49	228.583	617.376	311.56	938.859	84.7329	84.7329	1579.18	1270.78	36.234	36.234	944.474	592.296	1663.91	70.6936																												9338.14
endothelial cell migration	1460.46	84.7329	0	2242.62	36.234	862.952	2219.99	702.109	105.429	36.234	1387.28	192.349																															9330.39
platelet activation	84.7329	84.7329	878.49	84.7329	1653.38	311.56	538.395	0	84.7329	1888.99	704.056	84.7329	105.429	944.474	675.817	36.234	84.7329	20.6961	938.859	105.429																							9310.2
feeding behavior	880.001	1579.18	3267.22	1529.18	36.234	327.344	1663.91																																				9283.07
telencephalon development	36.234	2400.5	290.864	2531.53	20.6961	1568.82	675.817	84.7329	1663.91																																		9273.11
response to acid chemical	617.376	204.184	2400.5	20.6961	20.6961	704.056	36.234	1888.99	1279.9	2081.34																																	9253.97
negative regulation of autophagy	84.7329	2242.62	862.952	2531.53	1387.28	2133.31																																					9242.42
neutral lipid metabolic process	837.671	1653.38	938.859	675.817	1141.36	1215.76	775.545	105.429	959.555	938.859																																	9242.23
acylglycerol metabolic process	837.671	1653.38	938.859	675.817	1141.36	1215.76	775.545	105.429	959.555	938.859																																	9242.23
regulation of macroautophagy	84.7329	2242.62	36.234	1556.98	538.395	2219.99	2531.53	20.6961																																			9231.18
positive regulation of autophagy	2242.62	36.234	538.395	2219.99	2531.53	1568.82	84.7329																																				9222.32
peptidyl-tyrosine autophosphorylation	2400.5	538.395	1316.14	2219.99	1387.28	36.234	20.6961	1279.9																																			9199.13
fatty acid derivative biosynthetic process	0	20.6961	1761.93	2196.14	617.376	120.967	675.817	146.047	675.817	938.859	20.6961	249.96	801.437	938.859																													9164.6
regulation of protein dephosphorylation	2535.92	84.7329	290.864	1568.82	704.056	1794.97	309.613	1663.91	192.349																																		9145.23
regulation of dephosphorylation	2535.92	84.7329	290.864	1568.82	704.056	1794.97	309.613	1663.91	192.349																																		9145.23
extracellular matrix organization	617.376	240.418	25.08	204.184	928.936	204.184	25.08	2219.99	878.49	704.056	1004.13	702.109	1387.28																														9141.31
extracellular structure organization	617.376	240.418	25.08	204.184	928.936	204.184	25.08	2219.99	878.49	704.056	1004.13	702.109	1387.28																														9141.31
regulation of synapse organization	1888.99	2531.53	1387.28	36.234	327.344	1663.91	1279.9																																				9115.19
regulation of synapse structure or activity	1888.99	2531.53	1387.28	36.234	327.344	1663.91	1279.9																																				9115.19
regulation of epithelial cell apoptotic process	617.376	2535.92	2242.62	2219.99	675.817	801.437																																					9093.16
positive regulation of mitotic cell cycle phase transition	36.234	2400.5	675.817	1316.14	36.234	3034.49	1589.51																																				9088.92
regulation of endothelial cell proliferation	1460.46	2242.62	36.234	2196.14	86.68	2219.99	702.109	105.429	36.234																																		9085.89
endothelial cell proliferation	1460.46	2242.62	36.234	2196.14	86.68	2219.99	702.109	105.429	36.234																																		9085.89
response to corticosteroid	617.376	36.234	0	2400.5	2303.49	1579.18	20.6961	1542.94	538.395																																		9038.82
positive regulation of cellular protein catabolic process	928.936	2531.53	325.151	1316.14	1568.82	171.413	1387.28	801.437																																			9030.7
regulation of cellular protein catabolic process	928.936	2531.53	325.151	1316.14	1568.82	171.413	1387.28	801.437																																			9030.7
phospholipid biosynthetic process	84.7329	617.376	0	84.7329	938.859	817.176	1270.78	675.817	1491.71	249.96	938.859	801.437	0	105.429	938.859																												9015.73
positive regulation of angiogenesis	0	2242.62	36.234	617.376	2219.99	675.817	1943.62	105.429	36.234	938.859	84.7329	113.511																															9014.42
positive regulation of vasculature development	0	2242.62	36.234	617.376	2219.99	675.817	1943.62	105.429	36.234	938.859	84.7329	113.511																															9014.42
regulation of leukocyte apoptotic process	20.6961	84.7329	36.234	617.376	1268.11	2088.94	2272.87	2437.42	84.7329	84.7329	0																																8995.85
alpha-beta T cell activation	192.349	36.234	84.7329	290.864	938.859	2272.87	1004.13	84.7329	3267.22	801.437	20.6961																																8994.13
interleukin-6 production	574.629	20.6961	1653.38	311.56	2437.42	2085.24	20.6961	938.859	938.859																																		8981.34
cellular carbohydrate metabolic process	204.184	938.859	84.7329	938.859	1552.77	1568.82	817.176	675.817	86.68	2081.34																																	8949.24
signal transduction by p53 class mediator	20.6961	928.936	1888.99	0	1316.14	3034.49	84.7329	84.7329	1589.51																																		8948.22
regulation of response to interferon-gamma	1460.46	2535.92	938.859	837.671	1943.62	1215.76																																					8932.29
regulation of interferon-gamma-mediated signaling pathway	1460.46	2535.92	938.859	837.671	1943.62	1215.76																																					8932.29
negative regulation of cholesterol storage	1460.46	837.671	1552.77	938.859	1215.76	2923.61																																					8929.13
histone phosphorylation	2535.92	84.7329	928.936	538.395	0	3034.49	105.429	1589.51	84.7329																																		8902.14
diterpenoid metabolic process	2400.5	36.234	276.898	36.234	938.859	347.794	698.331	2081.34	2081.34																																		8897.53
regulation of epithelial cell migration	240.418	1460.46	0	2242.62	36.234	862.952	86.68	2219.99	105.429	36.234	1387.28	192.349																															8870.64
Fc receptor signaling pathway	84.7329	84.7329	84.7329	290.864	1556.98	86.68	20.6961	538.395	0	1888.99	325.151	171.413	84.7329	1387.28	309.613	36.234	1888.99	20.6961																									8860.92
regulation of carbohydrate metabolic process	938.859	36.234	938.859	1552.77	2437.42	1568.82	1270.78	86.68																																			8830.43
tumor necrosis factor production	2535.92	20.6961	20.6961	84.7329	290.864	1653.38	0	84.7329	938.859	938.859	2133.31	113.511																															8815.56
tumor necrosis factor superfamily cytokine production	2535.92	20.6961	20.6961	84.7329	290.864	1653.38	0	84.7329	938.859	938.859	2133.31	113.511																															8815.56
regulation of cell-substrate adhesion	2535.92	2219.99	204.184	617.376	0	1568.82	84.7329	1387.28	192.349																																		8810.65
regulation of circadian sleep/wake cycle, sleep	1794.97	84.7329	3267.22	327.344	1663.91	1665.86																																					8804.04
regulation of circadian sleep/wake cycle	1794.97	84.7329	3267.22	327.344	1663.91	1665.86																																					8804.04
circadian sleep/wake cycle, sleep	1794.97	84.7329	3267.22	327.344	1663.91	1665.86																																					8804.04
circadian sleep/wake cycle process	1794.97	84.7329	3267.22	327.344	1663.91	1665.86																																					8804.04
circadian sleep/wake cycle	1794.97	84.7329	3267.22	327.344	1663.91	1665.86																																					8804.04
circadian behavior	1794.97	84.7329	3267.22	327.344	1663.91	1665.86																																					8804.04
rhythmic behavior	1794.97	84.7329	3267.22	327.344	1663.91	1665.86																																					8804.04
lung development	2400.5	538.395	1087.63	1888.99	704.056	704.056	276.898	378.086	36.234	84.7329	698.331																																8797.91
respiratory tube development	2400.5	538.395	1087.63	1888.99	704.056	704.056	276.898	378.086	36.234	84.7329	698.331																																8797.91
G protein-coupled adenosine receptor signaling pathway	1565.71	1794.97	2085.24	84.7329	3267.22																																						8797.88
G protein-coupled purinergic receptor signaling pathway	1565.71	1794.97	2085.24	84.7329	3267.22																																						8797.88
regulation of fatty acid metabolic process	1460.46	0	837.671	1552.77	880.001	938.859	1215.76	959.555	938.859																																		8783.94
cellular response to hypoxia	617.376	0	2242.62	36.234	675.817	84.7329	1316.14	938.859	1589.51	105.429	192.349	25.08	959.555																														8783.7
cellular response to decreased oxygen levels	617.376	0	2242.62	36.234	675.817	84.7329	1316.14	938.859	1589.51	105.429	192.349	25.08	959.555																														8783.7
positive regulation of cardiac muscle cell proliferation	1888.99	1888.99	3034.49	378.086	1589.51																																						8780.07
positive regulation of cardiac muscle tissue growth	1888.99	1888.99	3034.49	378.086	1589.51																																						8780.07
positive regulation of heart growth	1888.99	1888.99	3034.49	378.086	1589.51																																						8780.07
positive regulation of cardiac muscle tissue development	1888.99	1888.99	3034.49	378.086	1589.51																																						8780.07
positive regulation of organ growth	1888.99	1888.99	3034.49	378.086	1589.51																																						8780.07
signal transduction in response to DNA damage	20.6961	928.936	1888.99	0	1316.14	3034.49	1589.51																																				8778.76
response to heat	0	2242.62	538.395	1888.99	1568.82	171.413	2196.38	84.7329	84.7329																																		8776.08
regulation of vascular associated smooth muscle cell proliferation	240.418	1460.46	2535.92	2242.62	204.184	86.68	675.817	1316.14																																			8762.23
vascular associated smooth muscle cell proliferation	240.418	1460.46	2535.92	2242.62	204.184	86.68	675.817	1316.14																																			8762.23
negative regulation of blood pressure	574.629	1552.77	880.001	2196.38	1794.97	84.7329	1663.91																																				8747.4
regulation of leukocyte differentiation	938.859	20.6961	36.234	84.7329	290.864	86.68	0	204.184	2272.87	105.429	84.7329	2444.85	592.296	617.376	20.6961	938.859																											8739.37
regulation of transporter activity	240.418	1460.46	20.6961	84.7329	20.6961	1579.18	944.474	84.7329	1663.91	938.859	1665.86																																8704.02
cellular response to heat	0	2242.62	538.395	1888.99	1568.82	171.413	2196.38	84.7329																																			8691.35
negative regulation of MAPK cascade	938.859	84.7329	290.864	1316.14	2437.42	1653.38	938.859	1023.59																																			8683.84
liver development	84.7329	36.234	2242.62	2400.5	928.936	862.952	86.68	1542.94	378.086	84.7329																																	8648.41
hepaticobiliary system development	84.7329	36.234	2242.62	2400.5	928.936	862.952	86.68	1542.94	378.086	84.7329																																	8648.41
regulation of wound healing	84.7329	878.49	84.7329	2196.14	311.56	204.184	704.056	105.429	1387.28	944.474	675.817	20.6961	1023.59																														8621.18
regulation of response to wounding	84.7329	878.49	84.7329	2196.14	311.56	204.184	704.056	105.429	1387.28	944.474	675.817	20.6961	1023.59																														8621.18
microglial cell activation	2535.92	290.864	86.68	2531.53	2196.38	36.234	938.859																																				8616.47
leukocyte activation involved in inflammatory response	2535.92	290.864	86.68	2531.53	2196.38	36.234	938.859																																				8616.47
response to osmotic stress	0	2400.5	20.6961	1888.99	2133.31	84.7329	2081.34																																				8609.57
response to zinc ion	1579.18	2437.42	2444.85	2133.31																																							8594.76
glycosyl compound metabolic process	290.864	2531.53	84.7329	1508.48	2081.34	2081.34																																					8578.29
regulation of endothelial cell migration	1460.46	0	2242.62	36.234	862.952	2219.99	105.429	36.234	1387.28	192.349																																	8543.55
nitric oxide biosynthetic process	617.376	574.629	2535.92	0	171.413	2196.38	84.7329	192.349	2133.31																																		8506.11
nitric oxide metabolic process	617.376	574.629	2535.92	0	171.413	2196.38	84.7329	192.349	2133.31																																		8506.11
reactive nitrogen species metabolic process	617.376	574.629	2535.92	0	171.413	2196.38	84.7329	192.349	2133.31																																		8506.11
erythrocyte differentiation	2535.92	938.859	36.234	1888.99	20.6961	2272.87	801.437																																				8495.01
type I interferon signaling pathway	938.859	1653.38	1364.63	1943.62	1653.38	938.859																																					8492.73
cellular response to type I interferon	938.859	1653.38	1364.63	1943.62	1653.38	938.859																																					8492.73
response to type I interferon	938.859	1653.38	1364.63	1943.62	1653.38	938.859																																					8492.73
receptor biosynthetic process	1460.46	2535.92	36.234	1552.77	84.7329	84.7329	1491.71	1215.76																																			8462.32
positive regulation of lipid localization	20.6961	84.7329	837.671	2437.42	1215.76	2923.61	938.859																																				8458.75
regulation of GTPase activity	617.376	84.7329	86.68	311.56	2531.53	204.184	1568.82	1387.28	36.234	347.794	1279.9																																8456.09
regulation of gliogenesis	1460.46	878.49	675.817	84.7329	3034.49	84.7329	84.7329	2133.31																																			8436.76
negative regulation of response to endoplasmic reticulum stress	2196.14	837.671	2531.53	1653.38	1215.76																																						8434.48
regulation of cyclase activity	574.629	1556.98	1888.99	538.395	20.6961	2085.24	84.7329	1663.91																																			8413.58
regulation of long-term synaptic potentiation	1568.82	1794.97	3267.22	1663.91	113.511																																						8408.43
regulation of intrinsic apoptotic signaling pathway	240.418	0	938.859	20.6961	36.234	1579.18	2531.53	1316.14	84.7329	1653.38																																	8401.16
cardiac muscle cell development	1552.77	704.056	704.056	3034.49	1589.51	801.437																																					8386.32
cardiac cell development	1552.77	704.056	704.056	3034.49	1589.51	801.437																																					8386.32
striated muscle cell development	1552.77	704.056	704.056	3034.49	1589.51	801.437																																					8386.32
muscle cell development	1552.77	704.056	704.056	3034.49	1589.51	801.437																																					8386.32
platelet-derived growth factor receptor signaling pathway	2535.92	938.859	1653.38	704.056	704.056	192.349	1653.38																																				8381.99
positive regulation of mitochondrial depolarization	1579.18	2219.99	2437.42	2133.31																																							8369.9
positive regulation of membrane depolarization	1579.18	2219.99	2437.42	2133.31																																							8369.9
positive regulation of ATP metabolic process	36.234	2437.42	3034.49	1270.78	1589.51																																						8368.44
positive regulation of peptide hormone secretion	2535.92	36.234	2400.5	84.7329	938.859	1663.91	698.331																																				8358.48
lymphocyte differentiation	192.349	938.859	20.6961	36.234	25.08	84.7329	290.864	0	938.859	204.184	2272.87	1004.13	84.7329	20.6961	938.859	1279.9	0																										8333.05
regulation of 84.7329ptive immune response	36.234	84.7329	290.864	84.7329	617.376	2272.87	2437.42	84.7329	675.817	801.437	938.859																																8325.08
negative regulation of insulin secretion	1653.38	1364.63	944.474	1663.91	1665.86	1023.59																																					8315.85
negative regulation of peptide hormone secretion	1653.38	1364.63	944.474	1663.91	1665.86	1023.59																																					8315.85
fatty acid oxidation	1460.46	1888.99	617.376	1552.77	880.001	938.859	959.555																																				8298.02
organic cation transport	1592.47	880.001	3267.22	36.234	84.7329	2401.19	20.6961																																				8282.54
protein deubiquitination	36.234	36.234	938.859	1316.14	702.109	3034.49	86.68	2111.14																																			8261.88
protein modification by small protein removal	36.234	36.234	938.859	1316.14	702.109	3034.49	86.68	2111.14																																			8261.88
production of molecular mediator of immune response	2242.62	20.6961	928.936	36.234	20.6961	290.864	2272.87	801.437	938.859	698.331																																	8251.54
icosanoid biosynthetic process	0	20.6961	1761.93	2196.14	617.376	120.967	675.817	146.047	675.817	20.6961	249.96	801.437	938.859																														8225.74
unsaturated fatty acid biosynthetic process	0	20.6961	1761.93	2196.14	617.376	675.817	146.047	675.817	938.859	249.96	938.859																																8221.5
positive regulation of fibroblast proliferation	20.6961	2400.5	86.68	938.859	36.234	704.056	704.056	1589.51	938.859	801.437																																	8220.89
organic acid catabolic process	574.629	2088.94	1552.77	880.001	938.859	84.7329	1141.36	959.555																																			8220.85
carboxylic acid catabolic process	574.629	2088.94	1552.77	880.001	938.859	84.7329	1141.36	959.555																																			8220.85
nucleoside triphosphate metabolic process	1579.18	2531.53	1542.94	84.7329	1508.48	938.859																																					8185.73
positive regulation of cold-induced thermogenesis	2535.92	1316.14	938.859	938.859	1491.71	20.6961	938.859																																				8181.04
detection of abiotic stimulus	228.583	1373.54	2196.38	1270.78	1794.97	36.234	1279.9																																				8180.4
one-carbon metabolic process	1542.94	592.296	105.429	1831.86	2444.85	1648.37																																					8165.76
positive regulation of phospholipase activity	617.376	2400.5	938.859	704.056	704.056	84.7329	1270.78	36.234	592.296	801.437																																	8150.33
regulation of phospholipase activity	617.376	2400.5	938.859	704.056	704.056	84.7329	1270.78	36.234	592.296	801.437																																	8150.33
glycerolipid biosynthetic process	84.7329	837.671	617.376	0	84.7329	1270.78	675.817	1491.71	1215.76	801.437	0	105.429	938.859																														8124.31
regulation of steroid biosynthetic process	158.118	938.859	2923.61	2133.31	938.859	1023.59																																					8116.35
regulation of pri-miRNA transcription by RNA polymerase II	1460.46	36.234	86.68	2303.49	675.817	1552.77	938.859	107.376	938.859																																		8100.55
pri-miRNA transcription by RNA polymerase II	1460.46	36.234	86.68	2303.49	675.817	1552.77	938.859	107.376	938.859																																		8100.55
purine nucleotide biosynthetic process	574.629	1579.18	290.864	2085.24	84.7329	84.7329	938.859	1508.48	938.859																																		8085.58
purine-containing compound biosynthetic process	574.629	1579.18	290.864	2085.24	84.7329	84.7329	938.859	1508.48	938.859																																		8085.58
energy derivation by oxidation of organic compounds	574.629	84.7329	36.234	84.7329	1568.82	276.898	3034.49	817.176	1589.51																																		8067.22
positive regulation of ubiquitin-dependent protein catabolic process	928.936	2531.53	325.151	1316.14	1568.82	1387.28																																					8057.85
positive regulation of proteolysis involved in cellular protein catabolic process	928.936	2531.53	325.151	1316.14	1568.82	1387.28																																					8057.85
regulation of ubiquitin-dependent protein catabolic process	928.936	2531.53	325.151	1316.14	1568.82	1387.28																																					8057.85
regulation of cholesterol transport	837.671	1215.76	2923.61	2133.31	938.859																																						8049.21
cholesterol transport	837.671	1215.76	2923.61	2133.31	938.859																																						8049.21
bone resorption	2400.5	2437.42	105.429	36.234	2444.85	592.296	20.6961																																				8037.43
bone remodeling	2400.5	2437.42	105.429	36.234	2444.85	592.296	20.6961																																				8037.43
skeletal system morphogenesis	204.184	1888.99	704.056	2437.42	704.056	702.109	675.817	675.817																																			7992.45
negative regulation of extrinsic apoptotic signaling pathway	617.376	2242.62	675.817	1568.82	702.109	36.234	2111.14																																				7954.12
detection of stimulus involved in sensory perception of pain	1373.54	2196.38	1270.78	1794.97	36.234	1279.9																																					7951.81
detection of external stimulus	1373.54	2196.38	1270.78	1794.97	36.234	1279.9																																					7951.81
muscle 84.7329ptation	2242.62	1579.18	84.7329	1552.77	105.429	1387.28	801.437	192.349																																			7945.79
digestion	20.6961	158.118	837.671	878.49	2196.38	36.234	944.474	0	1215.76	698.331	959.555																																7945.71
gonad development	617.376	36.234	938.859	20.6961	704.056	704.056	702.109	817.176	1279.9	2111.14																																	7931.61
development of primary sexual characteristics	617.376	36.234	938.859	20.6961	704.056	704.056	702.109	817.176	1279.9	2111.14																																	7931.61
sensory perception of temperature stimulus	1373.54	2196.38	1270.78	1794.97	1279.9																																						7915.58
immune response-activating cell surface receptor signaling pathway	84.7329	938.859	84.7329	84.7329	290.864	20.6961	538.395	0	1888.99	171.413	84.7329	1387.28	36.234	84.7329	309.613	36.234	84.7329	801.437	20.6961	938.859	0																						7887.97
immune response-activating signal transduction	84.7329	938.859	84.7329	84.7329	290.864	20.6961	538.395	0	1888.99	171.413	84.7329	1387.28	36.234	84.7329	309.613	36.234	84.7329	801.437	20.6961	938.859	0																						7887.97
potassium ion transport	288.123	84.7329	0	1270.78	1794.97	944.474	84.7329	0	1663.91	1665.86	84.7329																																7882.32
regulation of muscle cell apoptotic process	1460.46	2535.92	2242.62	617.376	1023.59																																						7879.96
muscle cell apoptotic process	1460.46	2535.92	2242.62	617.376	1023.59																																						7879.96
regulation of tumor necrosis factor production	2535.92	20.6961	20.6961	84.7329	290.864	1653.38	0	84.7329	938.859	2133.31	113.511																																7876.7
regulation of tumor necrosis factor superfamily cytokine production	2535.92	20.6961	20.6961	84.7329	290.864	1653.38	0	84.7329	938.859	2133.31	113.511																																7876.7
vascular endothelial growth factor receptor signaling pathway	84.7329	36.234	1888.99	2219.99	0	171.413	84.7329	36.234	1387.28	36.234	84.7329	1653.38	192.349																														7876.3
response to organophosphorus	0	1592.47	1542.94	2437.42	2196.38	0	105.429																																				7874.65
cellular monovalent inorganic cation homeostasis	288.123	84.7329	538.395	2531.53	1888.99	2444.85	84.7329																																				7861.36
growth hormone receptor signaling pathway	2535.92	0	2272.87	1387.28	1653.38																																						7849.45
cellular response to growth hormone stimulus	2535.92	0	2272.87	1387.28	1653.38																																						7849.45
response to growth hormone	2535.92	0	2272.87	1387.28	1653.38																																						7849.45
positive regulation of leukocyte proliferation	20.6961	20.6961	84.7329	25.08	290.864	538.395	84.7329	1888.99	2272.87	1387.28	84.7329	801.437	327.344	20.6961																													7848.55
regulation of nitric oxide biosynthetic process	617.376	2535.92	0	171.413	2196.38	192.349	2133.31																																				7846.75
response to UV	36.234	0	928.936	2400.5	1556.98	1579.18	0	20.6961	1316.14																																		7838.66
regulation of cellular response to oxidative stress	36.234	2196.14	862.952	1579.18	2531.53	592.296	36.234																																				7834.56
regulation of response to oxidative stress	36.234	2196.14	862.952	1579.18	2531.53	592.296	36.234																																				7834.56
regulation of tissue remodeling	158.118	2400.5	2437.42	105.429	36.234	36.234	2444.85	20.6961	192.349																																		7831.83
cellular response to interleukin-6	617.376	2535.92	938.859	1653.38	84.7329	1943.62																																					7773.88
response to interleukin-6	617.376	2535.92	938.859	1653.38	84.7329	1943.62																																					7773.88
cellular response to nutrient	1460.46	2242.62	158.118	84.7329	1316.14	2508.56																																					7770.63
epidermis development	158.118	2400.5	20.6961	1552.77	1004.13	378.086	938.859	84.7329	84.7329	192.349	938.859																																7753.83
cell cycle arrest	36.234	20.6961	928.936	0	1316.14	36.234	702.109	3034.49	1589.51	86.68																																	7751.03
positive regulation of protein-containing complex assembly	617.376	204.184	862.952	837.671	1579.18	938.859	617.376	325.151	1568.82	171.413	20.6961																																7743.68
positive regulation of amine transport	2437.42	3267.22	36.234	327.344	1663.91																																						7732.13
carbohydrate biosynthetic process	938.859	1552.77	1568.82	801.437	86.68	698.331	2081.34																																				7728.24
regulation of myeloid cell differentiation	938.859	84.7329	36.234	1888.99	86.68	0	105.429	84.7329	675.817	2444.85	592.296	84.7329	617.376	86.68																													7727.41
positive regulation of peptidase activity	1460.46	2535.92	36.234	1888.99	311.56	538.395	675.817	36.234	20.6961	192.349	25.08																																7721.73
regulation of leukocyte chemotaxis	20.6961	617.376	1888.99	538.395	1888.99	1387.28	36.234	724.752	617.376																																		7720.09
cartilage development	36.234	1888.99	1653.38	538.395	1542.94	702.109	675.817	675.817																																			7713.68
mammary gland epithelium development	36.234	2535.92	158.118	36.234	938.859	1888.99	2111.14																																				7705.5
mammary gland development	36.234	2535.92	158.118	36.234	938.859	1888.99	2111.14																																				7705.5
positive regulation of leukocyte chemotaxis	617.376	1888.99	538.395	1888.99	1387.28	36.234	724.752	617.376																																			7699.39
regulation of pH	288.123	538.395	2531.53	1888.99	2444.85																																						7691.89
response to iron ion	36.234	2242.62	36.234	1316.14	1589.51	1663.91	801.437																																				7686.08
biomineral tissue development	0	36.234	2196.14	617.376	1552.77	2437.42	36.234	617.376	192.349																																		7685.9
biomineralization	0	36.234	2196.14	617.376	1552.77	2437.42	36.234	617.376	192.349																																		7685.9
negative regulation of amine transport	880.001	1794.97	944.474	2401.19	1663.91																																						7684.54
cell death in response to oxidative stress	2535.92	36.234	84.7329	862.952	1579.18	2531.53	36.234																																				7666.78
production of molecular mediator involved in inflammatory response	574.629	878.49	2196.14	1888.99	2088.94	20.6961																																					7647.88
mast cell activation	2242.62	84.7329	880.001	2085.24	1289.73	20.6961	938.859	0	105.429																																		7647.31
cytokine production involved in inflammatory response	574.629	878.49	2196.14	1888.99	2088.94																																						7627.18
regulation of 84.7329ptive immune response based on somatic recombination of immune receptors built from immunoglobulin superfamily domains	36.234	84.7329	290.864	2272.87	2437.42	84.7329	675.817	801.437	938.859																																		7622.97
primary alcohol metabolic process	36.234	276.898	36.234	347.794	928.936	698.331	2081.34	1084.36	2081.34																																		7571.47
negative regulation of epithelial cell proliferation	1460.46	158.118	2196.14	702.109	938.859	2111.14																																					7566.83
insulin receptor signaling pathway	84.7329	938.859	84.7329	84.7329	1653.38	1316.14	0	45.7761	36.234	1568.82	84.7329	1653.38																															7551.51
digestive tract development	36.234	2400.5	84.7329	1542.94	704.056	378.086	675.817	1589.51	84.7329	36.234																																	7532.85
digestive system development	36.234	2400.5	84.7329	1542.94	704.056	378.086	675.817	1589.51	84.7329	36.234																																	7532.85
telomere maintenance	84.7329	84.7329	1579.18	538.395	675.817	1888.99	171.413	2508.56	0																																		7531.82
telomere organization	84.7329	84.7329	1579.18	538.395	675.817	1888.99	171.413	2508.56	0																																		7531.82
liver regeneration	36.234	2242.62	2400.5	928.936	1542.94	378.086																																					7529.32
long-chain fatty acid transport	1460.46	20.6961	45.7761	938.859	675.817	20.6961	1663.91	801.437	959.555	938.859																																	7526.07
positive regulation of lipid transport	20.6961	84.7329	837.671	2437.42	1215.76	2923.61																																					7519.89
interleukin-12-mediated signaling pathway	2535.92	20.6961	1364.63	1943.62	1648.37																																						7513.24
cellular response to interleukin-12	2535.92	20.6961	1364.63	1943.62	1648.37																																						7513.24
response to interleukin-12	2535.92	20.6961	1364.63	1943.62	1648.37																																						7513.24
granulocyte migration	192.349	617.376	1888.99	538.395	1888.99	1387.28	36.234	20.6961	801.437	0	105.429																																7477.17
regulation of interleukin-6 production	20.6961	1653.38	311.56	2437.42	2085.24	20.6961	938.859																																				7467.85
response to glucocorticoid	617.376	36.234	0	2400.5	2303.49	20.6961	1542.94	538.395																																			7459.64
negative regulation of DNA binding	2535.92	2242.62	86.68	84.7329	2508.56																																						7458.51
regulation of mast cell activation	2242.62	880.001	2085.24	1289.73	20.6961	938.859																																					7457.15
telomere maintenance via telomere lengthening	84.7329	1579.18	538.395	675.817	1888.99	171.413	2508.56																																				7447.09
regulation of bone resorption	2400.5	2437.42	105.429	36.234	2444.85	20.6961																																					7445.13
regulation of bone remodeling	2400.5	2437.42	105.429	36.234	2444.85	20.6961																																					7445.13
triglyceride metabolic process	837.671	1653.38	938.859	1215.76	775.545	105.429	959.555	938.859																																			7425.05
regulation of potassium ion transport	1270.78	1794.97	944.474	84.7329	0	1663.91	1665.86																																				7424.73
regulation of cellular pH	538.395	2531.53	1888.99	2444.85																																							7403.77
vasodilation	84.7329	1794.97	2085.24	3267.22	84.7329	84.7329																																					7401.63
negative regulation of organ growth	1592.47	1552.77	1387.28	801.437	698.331	1350.6																																					7382.88
negative regulation of developmental growth	1592.47	1552.77	1387.28	801.437	698.331	1350.6																																					7382.88
regulation of DNA biosynthetic process	1460.46	84.7329	538.395	1888.99	704.056	171.413	2508.56																																				7356.61
positive regulation of phospholipase C activity	617.376	2400.5	938.859	704.056	704.056	84.7329	1270.78	36.234	592.296																																		7348.89
regulation of phospholipase C activity	617.376	2400.5	938.859	704.056	704.056	84.7329	1270.78	36.234	592.296																																		7348.89
axon guidance	84.7329	84.7329	1653.38	538.395	0	1888.99	204.184	84.7329	105.429	1387.28	36.234	1279.9	0																														7347.99
neuron projection guidance	84.7329	84.7329	1653.38	538.395	0	1888.99	204.184	84.7329	105.429	1387.28	36.234	1279.9	0																														7347.99
dopamine receptor signaling pathway	2531.53	1568.82	1579.18	1663.91																																							7343.44
vasoconstriction	617.376	0	1592.47	2400.5	311.56	84.7329	84.7329	1270.78	36.234	944.474																																	7342.86
establishment of protein localization to mitochondrion	1556.98	2531.53	171.413	2133.31	938.859																																						7332.1
protein localization to mitochondrion	1556.98	2531.53	171.413	2133.31	938.859																																						7332.1
positive regulation of nitric-oxide synthase biosynthetic process	2535.92	20.6961	2219.99	2531.53																																							7308.14
nitric-oxide synthase biosynthetic process	2535.92	20.6961	2219.99	2531.53																																							7308.14
regulation of nitric-oxide synthase biosynthetic process	2535.92	20.6961	2219.99	2531.53																																							7308.14
B cell activation	938.859	20.6961	20.6961	25.08	84.7329	84.7329	290.864	0	20.6961	2272.87	84.7329	84.7329	801.437	327.344	20.6961	938.859	1279.9	0																									7296.94
regulation of reproductive process	228.583	928.936	938.859	880.001	84.7329	84.7329	86.68	36.234	565.226	2111.14	1350.6																																7295.73
regulation of lymphocyte proliferation	20.6961	20.6961	84.7329	25.08	290.864	2088.94	84.7329	20.6961	204.184	2272.87	84.7329	801.437	327.344	20.6961	938.859																												7286.56
regulation of mononuclear cell proliferation	20.6961	20.6961	84.7329	25.08	290.864	2088.94	84.7329	20.6961	204.184	2272.87	84.7329	801.437	327.344	20.6961	938.859																												7286.56
granulocyte chemotaxis	617.376	1888.99	538.395	1888.99	1387.28	36.234	20.6961	801.437	0	105.429																																	7284.83
cellular defense response	617.376	1268.11	36.234	2085.24	3267.22																																						7274.19
glucose transmembrane transport	204.184	1888.99	1653.38	675.817	0	84.7329	938.859	84.7329	801.437	938.859																																	7270.99
hexose transmembrane transport	204.184	1888.99	1653.38	675.817	0	84.7329	938.859	84.7329	801.437	938.859																																	7270.99
monosaccharide transmembrane transport	204.184	1888.99	1653.38	675.817	0	84.7329	938.859	84.7329	801.437	938.859																																	7270.99
carbohydrate transmembrane transport	204.184	1888.99	1653.38	675.817	0	84.7329	938.859	84.7329	801.437	938.859																																	7270.99
carbohydrate transport	204.184	1888.99	1653.38	675.817	0	84.7329	938.859	84.7329	801.437	938.859																																	7270.99
positive regulation of leukocyte mediated immunity	574.629	36.234	84.7329	290.864	2437.42	2085.24	801.437	20.6961	938.859																																		7270.12
regulation of phosphoprotein phosphatase activity	2535.92	290.864	1568.82	704.056	309.613	1663.91	192.349																																				7265.53
regulation of phosphatase activity	2535.92	290.864	1568.82	704.056	309.613	1663.91	192.349																																				7265.53
regulation of histone modification	1556.98	538.395	2531.53	1589.51	84.7329	938.859																																					7240.02
regulation of chromatin organization	1556.98	538.395	2531.53	1589.51	84.7329	938.859																																					7240.02
gland morphogenesis	158.118	2400.5	938.859	378.086	675.817	565.226	2111.14																																				7227.75
regulation of cholesterol metabolic process	1402.82	938.859	2923.61	938.859	1023.59																																						7227.74
response to amphetamine	617.376	290.864	84.7329	3267.22	1289.73	1663.91																																					7213.84
response to pain	228.583	1373.54	2196.38	1279.9	2133.31																																						7211.72
response to estradiol	36.234	0	1592.47	2400.5	938.859	20.6961	1031.73	704.056	276.898	192.349																																	7193.79
regulation of lipid catabolic process	84.7329	1552.77	880.001	36.234	817.176	1794.97	944.474	105.429	959.555																																		7175.35
regulation of ion transmembrane transporter activity	240.418	20.6961	20.6961	1579.18	944.474	84.7329	1663.91	938.859	1665.86																																		7158.82
regulation of transmembrane transporter activity	240.418	20.6961	20.6961	1579.18	944.474	84.7329	1663.91	938.859	1665.86																																		7158.82
protein localization to chromosome	938.859	675.817	3034.49	2508.56																																							7157.72
interleukin-6-mediated signaling pathway	2535.92	938.859	1653.38	84.7329	1943.62																																						7156.51
sensory perception of mechanical stimulus	617.376	20.6961	1373.54	2196.38	1270.78	0	36.234	327.344	1279.9																																		7122.26
response to cocaine	1316.14	880.001	84.7329	1579.18	1270.78	327.344	1663.91																																				7122.09
regulation of protein localization to membrane	2400.5	1556.98	0	204.184	36.234	801.437	2111.14																																				7110.48
sodium ion homeostasis	288.123	84.7329	1794.97	3267.22	1663.91																																						7098.96
male gonad development	617.376	36.234	938.859	704.056	704.056	702.109	1279.9	2111.14																																			7093.74
development of primary male sexual characteristics	617.376	36.234	938.859	704.056	704.056	702.109	1279.9	2111.14																																			7093.74
male sex differentiation	617.376	36.234	938.859	704.056	704.056	702.109	1279.9	2111.14																																			7093.74
cell killing	617.376	574.629	25.08	928.936	878.49	84.7329	290.864	290.864	2437.42	20.6961	938.859																																7087.95
regulation of mononuclear cell migration	1888.99	538.395	1888.99	1387.28	36.234	724.752	617.376																																				7082.01
mononuclear cell migration	1888.99	538.395	1888.99	1387.28	36.234	724.752	617.376																																				7082.01
positive regulation of GTPase activity	617.376	84.7329	86.68	311.56	2531.53	204.184	1568.82	36.234	347.794	1279.9																																	7068.82
leukocyte mediated cytotoxicity	617.376	574.629	25.08	928.936	878.49	84.7329	290.864	290.864	2437.42	938.859																																	7067.25
digestive system process	20.6961	158.118	837.671	2196.38	36.234	944.474	0	1215.76	698.331	959.555																																	7067.22
regulation of renal system process	311.56	1794.97	3267.22	1663.91																																							7037.66
morphogenesis of a branching epithelium	158.118	862.952	2219.99	938.859	84.7329	84.7329	565.226	2111.14																																			7025.76
regulation of lymphocyte apoptotic process	20.6961	84.7329	36.234	2088.94	2272.87	2437.42	84.7329																																				7025.63
lymphocyte apoptotic process	20.6961	84.7329	36.234	2088.94	2272.87	2437.42	84.7329																																				7025.63
response to acetylcholine	1579.18	2401.19	327.344	192.349	113.511	2401.19																																					7014.76
cellular response to acetylcholine	1579.18	2401.19	327.344	192.349	113.511	2401.19																																					7014.76
regulation of urine volume	3267.22	1663.91	2081.34																																								7012.47
response to retinoic acid	1460.46	1592.47	704.056	84.7329	675.817	675.817	565.226	538.395	698.331																																		6995.3
regulation of receptor biosynthetic process	1460.46	2535.92	36.234	1552.77	84.7329	84.7329	1215.76																																				6970.61
positive regulation of fatty acid metabolic process	1460.46	0	837.671	1552.77	938.859	1215.76	959.555																																				6965.08
regulation of cell cycle arrest	36.234	20.6961	928.936	0	1316.14	36.234	3034.49	1589.51																																			6962.24
positive regulation of synaptic transmission, glutamatergic	0	2400.5	3267.22	1279.9																																							6947.62
negative regulation of blood circulation	2535.92	311.56	2196.38	1794.97	105.429																																						6944.26
mitotic DNA integrity checkpoint	36.234	928.936	0	1316.14	3034.49	36.234	1589.51																																				6941.54
negative regulation of G1/S transition of mitotic cell cycle	36.234	928.936	0	1316.14	36.234	3034.49	1589.51																																				6941.54
negative regulation of cell cycle G1/S phase transition	36.234	928.936	0	1316.14	36.234	3034.49	1589.51																																				6941.54
mitotic cell cycle checkpoint	36.234	928.936	0	1316.14	3034.49	36.234	1589.51																																				6941.54
mesenchyme development	36.234	538.395	1888.99	1316.14	1568.82	704.056	84.7329	702.109	84.7329																																		6924.2
DNA replication	84.7329	2400.5	86.68	0	3034.49	378.086	938.859	0																																			6923.34
positive regulation of fat cell differentiation	1460.46	0	1888.99	938.859	1270.78	1350.6																																					6909.69
mitotic G1 DNA damage checkpoint	36.234	928.936	0	1316.14	3034.49	1589.51																																					6905.31
G1 DNA damage checkpoint	36.234	928.936	0	1316.14	3034.49	1589.51																																					6905.31
mitotic G1/S transition checkpoint	36.234	928.936	0	1316.14	3034.49	1589.51																																					6905.31
mitotic DNA damage checkpoint	36.234	928.936	0	1316.14	3034.49	1589.51																																					6905.31
multicellular organism growth	84.7329	1653.38	36.234	675.817	675.817	1663.91	2111.14																																				6901.03
humoral immune response	25.08	928.936	878.49	2196.14	290.864	0	36.234	801.437	938.859	801.437																																	6897.47
Fc-epsilon receptor signaling pathway	84.7329	84.7329	1556.98	86.68	20.6961	538.395	0	1888.99	325.151	84.7329	309.613	1888.99	20.6961																														6890.39
DNA damage response, signal transduction by p53 class mediator	20.6961	928.936	0	1316.14	3034.49	1589.51																																					6889.77
regulation of JNK cascade	20.6961	84.7329	2400.5	1316.14	36.234	1653.38	20.6961	1350.6																																			6882.97
DNA damage response, signal transduction by p53 class mediator resulting in cell cycle arrest	928.936	0	1316.14	3034.49	1589.51																																						6869.07
signal transduction involved in mitotic G1 DNA damage checkpoint	928.936	0	1316.14	3034.49	1589.51																																						6869.07
intracellular signal transduction involved in G1 DNA damage checkpoint	928.936	0	1316.14	3034.49	1589.51																																						6869.07
signal transduction involved in mitotic cell cycle checkpoint	928.936	0	1316.14	3034.49	1589.51																																						6869.07
signal transduction involved in mitotic DNA damage checkpoint	928.936	0	1316.14	3034.49	1589.51																																						6869.07
signal transduction involved in mitotic DNA integrity checkpoint	928.936	0	1316.14	3034.49	1589.51																																						6869.07
signal transduction involved in DNA integrity checkpoint	928.936	0	1316.14	3034.49	1589.51																																						6869.07
signal transduction involved in DNA damage checkpoint	928.936	0	1316.14	3034.49	1589.51																																						6869.07
signal transduction involved in cell cycle checkpoint	928.936	0	1316.14	3034.49	1589.51																																						6869.07
positive regulation of cell cycle arrest	928.936	0	1316.14	3034.49	1589.51																																						6869.07
positive regulation of lymphocyte activation	84.7329	20.6961	36.234	20.6961	84.7329	25.08	84.7329	290.864	1653.38	84.7329	0	2272.87	84.7329	36.234	801.437	327.344	20.6961	938.859																									6868.06
regulation of alpha-beta T cell activation	36.234	84.7329	290.864	2272.87	84.7329	3267.22	801.437	20.6961																																			6858.79
synaptic transmission, dopaminergic	0	1592.47	3267.22	327.344	1663.91																																						6850.95
regulation of protein ubiquitination	2531.53	325.151	702.109	171.413	938.859	36.234	2133.31																																				6838.61
regulation of protein modification by small protein conjugation or removal	2531.53	325.151	702.109	171.413	938.859	36.234	2133.31																																				6838.61
regulation of T cell proliferation	84.7329	25.08	290.864	2088.94	84.7329	20.6961	204.184	2272.87	801.437	20.6961	938.859																																6833.1
negative regulation of cell growth	1460.46	1552.77	1031.73	938.859	801.437	938.859	107.376																																				6831.5
acetylcholine receptor signaling pathway	1579.18	2401.19	327.344	113.511	2401.19																																						6822.41
positive regulation of cyclase activity	574.629	1556.98	1888.99	538.395	2085.24	84.7329																																					6728.97
regulation of renal sodium excretion	1794.97	3267.22	1663.91																																								6726.1
renal sodium excretion	1794.97	3267.22	1663.91																																								6726.1
regulation of excretion	1794.97	3267.22	1663.91																																								6726.1
regulation of muscle contraction	0	228.583	311.56	1794.97	2085.24	84.7329	944.474	36.234	84.7329	0	938.859	84.7329	105.429																														6699.55
phosphatidylcholine metabolic process	837.671	724.752	675.817	1491.71	1215.76	801.437	938.859																																				6686
response to epidermal growth factor	2400.5	1653.38	538.395	1888.99	204.184																																						6685.44
positive regulation of proteasomal ubiquitin-dependent protein catabolic process	928.936	2531.53	325.151	1316.14	1568.82																																						6670.58
positive regulation of proteasomal protein catabolic process	928.936	2531.53	325.151	1316.14	1568.82																																						6670.58
regulation of proteasomal ubiquitin-dependent protein catabolic process	928.936	2531.53	325.151	1316.14	1568.82																																						6670.58
response to antibiotic	2535.92	20.6961	1316.14	1943.62	171.413	675.817																																					6663.6
regulation of telomerase activity	1460.46	84.7329	538.395	1888.99	171.413	2508.56																																					6652.56
actin filament organization	617.376	192.349	2535.92	84.7329	862.952	617.376	0	702.109	36.234	192.349	801.437																																6642.83
purine nucleoside triphosphate metabolic process	1579.18	2531.53	84.7329	1508.48	938.859																																						6642.79
negative regulation of heart contraction	2535.92	2196.38	1794.97	105.429																																							6632.7
response to calcium ion	204.184	36.234	2400.5	86.68	617.376	84.7329	2437.42	675.817	84.7329																																		6627.68
cholesterol biosynthetic process	938.859	801.437	2923.61	938.859	1023.59																																						6626.36
secondary alcohol biosynthetic process	938.859	801.437	2923.61	938.859	1023.59																																						6626.36
sterol biosynthetic process	938.859	801.437	2923.61	938.859	1023.59																																						6626.36
response to carbohydrate	617.376	84.7329	0	36.234	1316.14	20.6961	84.7329	938.859	1364.63	944.474	84.7329	107.376	1023.59																														6623.58
regulation of norepinephrine secretion	944.474	3267.22	2401.19																																								6612.88
norepinephrine secretion	944.474	3267.22	2401.19																																								6612.88
norepinephrine transport	944.474	3267.22	2401.19																																								6612.88
regulation of telomere maintenance via telomere lengthening	84.7329	1579.18	538.395	1888.99	2508.56																																						6599.86
regulation of telomere maintenance	84.7329	1579.18	538.395	1888.99	2508.56																																						6599.86
telencephalon cell migration	2400.5	2531.53	1663.91																																								6595.94
regulation of macrophage migration	20.6961	1888.99	538.395	1888.99	1387.28	36.234	801.437																																				6562.02
macrophage migration	20.6961	1888.99	538.395	1888.99	1387.28	36.234	801.437																																				6562.02
positive regulation of mitochondrion organization	240.418	36.234	1556.98	2219.99	1568.82	938.859																																					6561.31
purine ribonucleoside triphosphate metabolic process	1579.18	2531.53	1508.48	938.859																																							6558.06
ribonucleoside triphosphate metabolic process	1579.18	2531.53	1508.48	938.859																																							6558.06
detection of temperature stimulus involved in sensory perception of pain	2196.38	1270.78	1794.97	1279.9																																							6542.04
detection of temperature stimulus involved in sensory perception	2196.38	1270.78	1794.97	1279.9																																							6542.04
detection of temperature stimulus	2196.38	1270.78	1794.97	1279.9																																							6542.04
response to hexose	617.376	84.7329	0	36.234	1316.14	20.6961	84.7329	938.859	1364.63	944.474	107.376	1023.59																															6538.84
response to monosaccharide	617.376	84.7329	0	36.234	1316.14	20.6961	84.7329	938.859	1364.63	944.474	107.376	1023.59																															6538.84
response to glucose	617.376	84.7329	36.234	1316.14	20.6961	84.7329	938.859	1364.63	944.474	107.376	1023.59																																6538.84
positive regulation of interleukin-6 production	20.6961	1653.38	311.56	2437.42	2085.24	20.6961																																					6528.99
response to fluid shear stress	0	2437.42	704.056	2444.85	938.859																																						6525.19
regulation of ERBB signaling pathway	240.418	938.859	2400.5	204.184	1794.97	944.474																																					6523.4
regulation of smooth muscle contraction	0	228.583	311.56	1794.97	2085.24	84.7329	944.474	36.234	938.859	84.7329																																	6509.39
regulation of actin filament-based process	617.376	192.349	84.7329	862.952	617.376	0	704.056	704.056	702.109	1794.97	36.234	192.349																															6508.56
positive regulation of T cell activation	84.7329	36.234	84.7329	25.08	84.7329	290.864	1653.38	84.7329	0	2272.87	84.7329	36.234	801.437	20.6961	938.859																												6499.32
retinoid metabolic process	36.234	276.898	36.234	938.859	347.794	698.331	2081.34	2081.34																																			6497.03
cellular response to vascular endothelial growth factor stimulus	1888.99	2219.99	704.056	704.056	36.234	938.859																																					6492.19
positive regulation of nucleotide metabolic process	574.629	36.234	2437.42	1270.78	2085.24	84.7329																																					6489.04
positive regulation of purine nucleotide metabolic process	574.629	36.234	2437.42	1270.78	2085.24	84.7329																																					6489.04
adult behavior	1552.77	84.7329	1579.18	1270.78	327.344	1663.91																																					6478.72
negative regulation of leukocyte apoptotic process	20.6961	84.7329	36.234	617.376	1268.11	2088.94	2272.87	84.7329																																			6473.7
receptor-mediated endocytosis	617.376	617.376	1004.13	171.413	84.7329	801.437	1491.71	20.6961	1663.91																																		6472.78
growth hormone receptor signaling pathway via JAK-STAT	2535.92	2272.87	1653.38																																								6462.17
branching morphogenesis of an epithelial tube	158.118	862.952	2219.99	938.859	84.7329	84.7329	2111.14																																				6460.53
regulation of Ras protein signal transduction	2535.92	84.7329	862.952	311.56	84.7329	704.056	592.296	1279.9																																			6456.15
cellular respiration	574.629	84.7329	36.234	276.898	3034.49	817.176	1589.51																																				6413.67
positive regulation of sprouting angiogenesis	0	2242.62	2219.99	1943.62																																							6406.23
regulation of production of molecular mediator of immune response	2242.62	20.6961	36.234	20.6961	290.864	2272.87	801.437	698.331																																			6383.75
G protein-coupled acetylcholine receptor signaling pathway	1579.18	2401.19	2401.19																																								6381.55
interleukin-12 production	20.6961	84.7329	1888.99	2088.94	2272.87	20.6961																																					6376.93
response to transforming growth factor beta	86.68	2303.49	1579.18	702.109	84.7329	1387.28	36.234	192.349																																			6372.05
positive regulation of ossification	2196.14	1653.38	84.7329	2437.42																																							6371.67
positive regulation of protein binding	240.418	675.817	2531.53	1568.82	1350.6																																						6367.18
regulation of granulocyte chemotaxis	617.376	1888.99	538.395	1888.99	1387.28	36.234																																					6357.26
osteoclast differentiation	1888.99	0	2444.85	592.296	801.437	617.376																																					6344.95
regulation of interleukin-1 production	2535.92	36.234	311.56	2437.42	84.7329	938.859																																					6344.72
interleukin-1 production	2535.92	36.234	311.56	2437.42	84.7329	938.859																																					6344.72
cellular response to mechanical stimulus	192.349	0	2400.5	1556.98	1653.38	538.395																																					6341.6
regulation of glucose transmembrane transport	204.184	1888.99	1653.38	675.817	0	84.7329	84.7329	801.437	938.859																																		6332.13
positive regulation of carbohydrate metabolic process	938.859	36.234	1552.77	2437.42	1270.78	86.68																																					6322.75
cell aging	617.376	20.6961	84.7329	1888.99	675.817	3034.49																																					6322.1
regulation of epidermal growth factor receptor signaling pathway	240.418	938.859	2400.5	1794.97	944.474																																						6319.22
regulation of G protein-coupled receptor signaling pathway	878.49	862.952	105.429	1579.18	84.7329	86.68	84.7329	1663.91	192.349	775.545																																	6314
cytokine production involved in immune response	2242.62	36.234	20.6961	2272.87	801.437	938.859																																					6312.72
regulation of cell 86.68ction assembly	2219.99	592.296	1387.28	309.613	327.344	1279.9	192.349																																				6308.77
positive regulation of NF-kappaB transcription factor activity	617.376	20.6961	36.234	84.7329	20.6961	309.613	938.859	84.7329	1279.9	801.437	2111.14																																6305.42
embryonic organ morphogenesis	36.234	538.395	1888.99	704.056	702.109	378.086	675.817	675.817	698.331																																		6297.83
positive regulation of endocytosis	1460.46	617.376	2531.53	20.6961	1663.91																																						6293.98
regulation of interleukin-12 production	20.6961	1888.99	2088.94	2272.87	20.6961																																						6292.2
icosanoid transport	574.629	20.6961	2437.42	86.68	675.817	20.6961	1663.91	801.437																																			6281.29
fatty acid derivative transport	574.629	20.6961	2437.42	86.68	675.817	20.6961	1663.91	801.437																																			6281.29
peptidyl-tyrosine dephosphorylation	938.859	290.864	1653.38	801.437	1653.38	938.859																																					6276.77
glycerolipid catabolic process	938.859	724.752	675.817	1141.36	775.545	105.429	959.555	938.859																																			6260.18
regulation of interleukin-1 beta production	2535.92	36.234	311.56	2437.42	938.859																																						6259.99
interleukin-1 beta production	2535.92	36.234	311.56	2437.42	938.859																																						6259.99
neural precursor cell proliferation	1592.47	36.234	2531.53	378.086	36.234	1663.91																																					6238.47
cellular modified amino acid metabolic process	1004.13	1542.94	592.296	817.176	675.817	801.437	801.437																																				6235.23
cellular response to low-density lipoprotein particle stimulus	1460.46	84.7329	801.437	20.6961	2923.61	938.859																																					6229.8
response to lipoprotein particle	1460.46	84.7329	801.437	20.6961	2923.61	938.859																																					6229.8
cellular response to lipoprotein particle stimulus	1460.46	84.7329	801.437	20.6961	2923.61	938.859																																					6229.8
regulation of monooxygenase activity	158.118	36.234	2400.5	675.817	880.001	592.296	171.413	1289.73																																			6204.11
regulation of neural precursor cell proliferation	1592.47	36.234	2531.53	378.086	1663.91																																						6202.23
icosanoid secretion	574.629	20.6961	2437.42	675.817	20.6961	1663.91	801.437																																				6194.61
monosaccharide biosynthetic process	938.859	1552.77	801.437	86.68	698.331	2081.34																																					6159.42
regulation of morphogenesis of a branching structure	938.859	2531.53	565.226	2111.14																																							6146.76
cellular response to osmotic stress	0	20.6961	1888.99	2133.31	2081.34																																						6124.34
negative regulation of innate immune response	1460.46	938.859	837.671	1663.91	1215.76																																						6116.66
negative regulation of response to biotic stimulus	1460.46	938.859	837.671	1663.91	1215.76																																						6116.66
G protein-coupled serotonin receptor signaling pathway	1270.78	36.234	2401.19	2401.19																																							6109.39
serotonin receptor signaling pathway	1270.78	36.234	2401.19	2401.19																																							6109.39
genitalia development	1653.38	938.859	704.056	698.331	2111.14																																						6105.77
cellular response to alcohol	1460.46	192.349	36.234	329.771	938.859	2923.61	192.349																																				6073.63
glycerophospholipid biosynthetic process	84.7329	617.376	0	84.7329	1270.78	675.817	1491.71	801.437	0	105.429	938.859																																6070.88
T cell differentiation	192.349	938.859	36.234	84.7329	290.864	938.859	204.184	2272.87	1004.13	84.7329	20.6961	0																															6068.51
regulation of blood vessel endothelial cell migration	1460.46	0	2242.62	36.234	2219.99	105.429																																					6064.73
blood vessel endothelial cell migration	1460.46	0	2242.62	36.234	2219.99	105.429																																					6064.73
ribose phosphate biosynthetic process	1579.18	290.864	938.859	1508.48	801.437	938.859																																					6057.68
regulation of nitric-oxide synthase activity	36.234	2400.5	675.817	880.001	592.296	171.413	1289.73																																				6045.99
bicarbonate transport	105.429	1831.86	2444.85	1648.37																																							6030.52
positive regulation of epithelial cell migration	240.418	0	2242.62	36.234	862.952	86.68	2219.99	105.429	36.234	192.349																																	6022.9
positive regulation of receptor signaling pathway via JAK-STAT	2535.92	878.49	311.56	84.7329	84.7329	36.234	2081.34																																				6013.01
positive regulation of receptor signaling pathway via STAT	2535.92	878.49	311.56	84.7329	84.7329	36.234	2081.34																																				6013.01
import into cell	288.123	84.7329	1592.47	45.7761	2196.38	84.7329	36.234	1663.91																																			5992.36
defense response to bacterium	109.813	574.629	25.08	20.6961	928.936	36.234	878.49	84.7329	2437.42	36.234	20.6961	801.437																															5954.4
tyrosine phosphorylation of STAT protein	2535.92	938.859	84.7329	2272.87	84.7329	36.234																																					5953.35
bone mineralization	0	36.234	2196.14	617.376	2437.42	36.234	617.376																																				5940.78
interleukin-27-mediated signaling pathway	2535.92	1364.63	84.7329	1943.62																																							5928.91
ether metabolic process	2196.14	928.936	724.752	1402.82	675.817																																						5928.46
regulation of cholesterol efflux	837.671	1215.76	2923.61	938.859																																							5915.9
cholesterol efflux	837.671	1215.76	2923.61	938.859																																							5915.9
positive regulation of DNA replication	2400.5	86.68	0	3034.49	378.086																																						5899.75
regulation of DNA replication	2400.5	86.68	0	3034.49	378.086																																						5899.75
positive regulation of DNA biosynthetic process	84.7329	538.395	1888.99	704.056	171.413	2508.56																																					5896.15
regulation of calcium ion transmembrane transport	20.6961	878.49	311.56	20.6961	84.7329	944.474	84.7329	36.234	1663.91	801.437	938.859	105.429																															5891.25
memory	0	1592.47	880.001	1270.78	36.234	327.344	1663.91	113.511																																			5884.25
negative regulation of intrinsic apoptotic signaling pathway	240.418	0	20.6961	36.234	2531.53	1316.14	84.7329	1653.38																																			5883.13
B cell differentiation	938.859	20.6961	25.08	290.864	0	2272.87	84.7329	20.6961	938.859	1279.9																																	5872.56
positive regulation of circadian rhythm	938.859	3267.22	1665.86																																								5871.94
telomere maintenance via telomerase	84.7329	538.395	675.817	1888.99	171.413	2508.56																																					5867.91
RNA-dependent DNA biosynthetic process	84.7329	538.395	675.817	1888.99	171.413	2508.56																																					5867.91
ventricular cardiac muscle cell differentiation	3034.49	675.817	1589.51	565.226																																							5865.04
positive regulation of neurotransmitter transport	880.001	3267.22	36.234	1663.91																																							5847.37
response to sterol	1268.11	938.859	702.109	2923.61																																							5832.69
positive regulation of DNA binding	240.418	1460.46	2535.92	1579.18																																							5815.98
positive regulation of anion transport	20.6961	84.7329	2437.42	3267.22																																							5810.07
regulation of G2/M transition of mitotic cell cycle	36.234	928.936	0	36.234	171.413	3034.49	1589.51																																				5796.82
regulation of cell cycle G2/M phase transition	36.234	928.936	0	36.234	171.413	3034.49	1589.51																																				5796.82
cardiac muscle hypertrophy	1579.18	84.7329	1552.77	84.7329	105.429	1387.28	801.437	192.349																																			5787.91
striated muscle hypertrophy	1579.18	84.7329	1552.77	84.7329	105.429	1387.28	801.437	192.349																																			5787.91
muscle hypertrophy	1579.18	84.7329	1552.77	84.7329	105.429	1387.28	801.437	192.349																																			5787.91
response to amyloid-beta	617.376	240.418	204.184	25.08	1579.18	1316.14	1568.82	86.68	36.234	113.511																																	5787.62
negative regulation of cysteine-type endopeptidase activity involved in apoptotic process	240.418	0	1316.14	3267.22	959.555																																						5783.33
negative regulation of cysteine-type endopeptidase activity	240.418	0	1316.14	3267.22	959.555																																						5783.33
extrinsic apoptotic signaling pathway via death domain receptors	617.376	2242.62	0	1568.82	1350.6																																						5779.41
regulation of extrinsic apoptotic signaling pathway via death domain receptors	617.376	2242.62	1568.82	1350.6																																							5779.41
morphogenesis of embryonic epithelium	36.234	20.6961	675.817	1579.18	2111.14	1350.6																																					5773.67
regulation of phospholipid metabolic process	84.7329	0	704.056	704.056	817.176	1387.28	1270.78	801.437																																			5769.52
regulation of macrophage chemotaxis	20.6961	1888.99	538.395	1888.99	1387.28	36.234																																					5760.58
macrophage chemotaxis	20.6961	1888.99	538.395	1888.99	1387.28	36.234																																					5760.58
NIK/NF-kappaB signaling	20.6961	36.234	2400.5	20.6961	938.859	2339.73																																					5756.71
negative regulation of epithelial cell apoptotic process	617.376	2242.62	2219.99	675.817																																							5755.8
cellular response to alkaloid	617.376	20.6961	1316.14	20.6961	2196.38	1579.18																																					5750.47
response to ionizing radiation	617.376	36.234	290.864	1888.99	1579.18	20.6961	1316.14																																				5749.47
negative regulation of leukocyte mediated immunity	2242.62	290.864	2272.87	938.859																																							5745.21
positive regulation of macrophage chemotaxis	1888.99	538.395	1888.99	1387.28	36.234																																						5739.89
positive regulation of macrophage migration	1888.99	538.395	1888.99	1387.28	36.234																																						5739.89
regulation of NIK/NF-kappaB signaling	20.6961	36.234	2400.5	938.859	2339.73																																						5736.02
positive regulation of organic acid transport	20.6961	2437.42	3267.22																																								5725.34
positive regulation of synaptic transmission, GABAergic	3267.22	2444.85																																									5712.08
positive regulation of glutamate secretion	2437.42	3267.22																																									5704.64
positive regulation of amino acid transport	2437.42	3267.22																																									5704.64
astrocyte activation	2400.5	36.234	3267.22																																								5703.95
astrocyte development	2400.5	36.234	3267.22																																								5703.95
regulation of cardiac muscle hypertrophy	1579.18	84.7329	1552.77	105.429	1387.28	801.437	192.349																																				5703.18
regulation of muscle hypertrophy	1579.18	84.7329	1552.77	105.429	1387.28	801.437	192.349																																				5703.18
regulation of muscle 84.7329ptation	1579.18	84.7329	1552.77	105.429	1387.28	801.437	192.349																																				5703.18
positive regulation of NIK/NF-kappaB signaling	20.6961	2400.5	938.859	2339.73																																							5699.78
positive regulation of hemopoiesis	36.234	36.234	84.7329	290.864	1888.99	86.68	105.429	84.7329	2444.85	617.376	20.6961																																5696.82
positive regulation of endothelial cell migration	0	2242.62	36.234	862.952	2219.99	105.429	36.234	192.349																																			5695.81
positive regulation of histone modification	538.395	2531.53	1589.51	84.7329	938.859																																						5683.03
positive regulation of chromatin organization	538.395	2531.53	1589.51	84.7329	938.859																																						5683.03
cell-matrix adhesion	25.08	2219.99	204.184	0	1568.82	84.7329	1387.28	192.349																																			5682.43
tetrapyrrole metabolic process	2242.62	878.49	276.898	86.68	2133.31	61.314																																					5679.31
embryonic placenta development	36.234	2400.5	1888.99	1350.6																																							5676.32
regulation of macrophage activation	20.6961	290.864	2531.53	675.817	938.859	1215.76																																					5673.53
antigen receptor-mediated signaling pathway	84.7329	938.859	84.7329	290.864	20.6961	0	1888.99	84.7329	84.7329	309.613	36.234	84.7329	801.437	20.6961	938.859	0																											5669.91
regulation of vasoconstriction	617.376	0	2400.5	311.56	84.7329	1270.78	36.234	944.474																																			5665.66
face development	204.184	1653.38	538.395	1888.99	704.056	675.817																																					5664.82
cellular response to carbohydrate stimulus	617.376	84.7329	36.234	1316.14	84.7329	1364.63	944.474	84.7329	107.376	1023.59																																	5664.02
intracellular estrogen receptor signaling pathway	1579.18	938.859	1031.73	2111.14																																							5660.92
regulation of protein tyrosine kinase activity	938.859	290.864	1794.97	944.474	36.234	1653.38																																					5658.78
regulation of cell-matrix adhesion	2219.99	204.184	0	1568.82	84.7329	1387.28	192.349																																				5657.35
ovulation cycle	2400.5	938.859	20.6961	704.056	1579.18																																						5643.29
regulation of signaling receptor activity	84.7329	204.184	1031.73	1579.18	1794.97	944.474																																					5639.27
regulation of glial cell differentiation	1460.46	878.49	84.7329	3034.49	84.7329	84.7329																																					5627.64
behavioral response to pain	2196.38	1279.9	2133.31																																								5609.6
positive regulation of pri-miRNA transcription by RNA polymerase II	1460.46	36.234	86.68	2303.49	675.817	107.376	938.859																																				5608.92
chondrocyte differentiation	1888.99	1653.38	702.109	675.817	675.817																																						5596.11
positive regulation of Ras protein signal transduction	2535.92	84.7329	311.56	84.7329	704.056	592.296	1279.9																																				5593.2
positive regulation of small GTPase mediated signal transduction	2535.92	84.7329	311.56	84.7329	704.056	592.296	1279.9																																				5593.2
lymphocyte mediated immunity	617.376	36.234	84.7329	84.7329	290.864	290.864	2437.42	0	801.437	938.859																																	5582.52
negative regulation of transmembrane transport	240.418	20.6961	20.6961	944.474	84.7329	1663.91	1665.86	938.859																																			5579.65
cellular glucose homeostasis	617.376	84.7329	36.234	1316.14	0	84.7329	1364.63	944.474	107.376	1023.59																																	5579.29
cellular response to glucose stimulus	617.376	84.7329	36.234	1316.14	84.7329	1364.63	944.474	107.376	1023.59																																		5579.29
cellular response to hexose stimulus	617.376	84.7329	36.234	1316.14	84.7329	1364.63	944.474	107.376	1023.59																																		5579.29
cellular response to monosaccharide stimulus	617.376	84.7329	36.234	1316.14	84.7329	1364.63	944.474	107.376	1023.59																																		5579.29
leukocyte homeostasis	20.6961	36.234	617.376	20.6961	2272.87	2437.42	84.7329	84.7329	0																																		5574.76
regulation of calcium ion transport into cytosol	878.49	311.56	84.7329	2437.42	84.7329	36.234	938.859	801.437																																			5573.47
nucleoside triphosphate biosynthetic process	1579.18	1542.94	1508.48	938.859																																							5569.47
neuron projection organization	1316.14	2531.53	1568.82	36.234	113.511																																						5566.23
T cell receptor signaling pathway	84.7329	938.859	84.7329	290.864	20.6961	0	1888.99	84.7329	84.7329	309.613	36.234	801.437	938.859	0																													5564.48
retinol metabolic process	36.234	276.898	36.234	347.794	698.331	2081.34	2081.34																																				5558.17
anaphase-promoting complex-dependent catabolic process	928.936	0	3034.49	1589.51																																							5552.94
cellular detoxification	109.813	0	1761.93	45.7761	592.296	2081.34	959.555																																				5550.71
cellular response to toxic substance	109.813	0	1761.93	45.7761	592.296	2081.34	959.555																																				5550.71
detoxification	109.813	0	1761.93	45.7761	592.296	2081.34	959.555																																				5550.71
regulation of cytokine production involved in inflammatory response	574.629	878.49	2196.14	1888.99																																							5538.25
response to isoquinoline alkaloid	1316.14	880.001	1579.18	84.7329	1663.91																																						5523.96
response to morphine	1316.14	880.001	1579.18	84.7329	1663.91																																						5523.96
positive regulation of nitric oxide biosynthetic process	617.376	2535.92	0	171.413	2196.38																																						5521.09
positive regulation of nitric oxide metabolic process	617.376	2535.92	0	171.413	2196.38																																						5521.09
positive regulation of reactive oxygen species biosynthetic process	617.376	2535.92	0	171.413	2196.38																																						5521.09
regulation of biomineral tissue development	36.234	2196.14	2437.42	36.234	617.376	192.349																																					5515.75
regulation of biomineralization	36.234	2196.14	2437.42	36.234	617.376	192.349																																					5515.75
inflammatory response to antigenic stimulus	617.376	928.936	84.7329	617.376	880.001	1579.18	801.437																																				5509.04
endocrine process	25.08	1653.38	311.56	20.6961	538.395	36.234	2923.61																																				5508.95
heart morphogenesis	36.234	86.68	1316.14	702.109	675.817	1387.28	36.234	565.226	698.331																																		5504.04
mast cell degranulation	2242.62	84.7329	2085.24	20.6961	938.859	0	105.429																																				5477.58
mast cell activation involved in immune response	2242.62	84.7329	2085.24	20.6961	938.859	0	105.429																																				5477.58
mast cell mediated immunity	2242.62	84.7329	2085.24	20.6961	938.859	0	105.429																																				5477.58
lysosome localization	2242.62	84.7329	2085.24	20.6961	938.859	0	105.429																																				5477.58
regulation of gene silencing	1460.46	2400.5	938.859	675.817	0																																						5475.64
fatty acid catabolic process	1552.77	880.001	938.859	1141.36	959.555																																						5472.55
monocarboxylic acid catabolic process	1552.77	880.001	938.859	1141.36	959.555																																						5472.55
organelle inheritance	538.395	1888.99	3034.49																																								5461.87
Golgi inheritance	538.395	1888.99	3034.49																																								5461.87
negative regulation of cell projection organization	84.7329	2531.53	1316.14	84.7329	1387.28	36.234																																					5440.65
positive regulation of endothelial cell proliferation	2242.62	36.234	86.68	2219.99	702.109	105.429	36.234																																				5429.29
positive regulation of protein dephosphorylation	2535.92	84.7329	290.864	704.056	1794.97																																						5410.54
positive regulation of dephosphorylation	2535.92	84.7329	290.864	704.056	1794.97																																						5410.54
regulation of sensory perception of pain	311.56	1579.18	1794.97	775.545	938.859																																						5400.11
regulation of sensory perception	311.56	1579.18	1794.97	775.545	938.859																																						5400.11
regulation of macrophage derived foam cell differentiation	1460.46	837.671	1552.77	325.151	1215.76																																						5391.81
macrophage derived foam cell differentiation	1460.46	837.671	1552.77	325.151	1215.76																																						5391.81
foam cell differentiation	1460.46	837.671	1552.77	325.151	1215.76																																						5391.81
regulation of cytokine production involved in immune response	2242.62	36.234	20.6961	2272.87	801.437																																						5373.86
phenol-containing compound metabolic process	290.864	1004.13	327.344	1663.91	2081.34																																						5367.59
hexose biosynthetic process	938.859	1552.77	86.68	698.331	2081.34																																						5357.98
axon regeneration	2535.92	86.68	592.296	2133.31																																							5348.21
neuron projection regeneration	2535.92	86.68	592.296	2133.31																																							5348.21
hormone biosynthetic process	36.234	2133.31	2081.34	1084.36																																							5335.25
cytokine secretion	192.349	20.6961	36.234	20.6961	2437.42	20.6961	1663.91	938.859																																			5330.86
CD4-positive, alpha-beta T cell activation	192.349	36.234	84.7329	938.859	2272.87	1004.13	801.437																																				5330.61
regulation of bone mineralization	36.234	2196.14	2437.42	36.234	617.376																																						5323.4
positive regulation of tissue remodeling	158.118	2400.5	105.429	2444.85	20.6961	192.349																																					5321.94
cellular response to dexamethasone stimulus	617.376	2400.5	2303.49																																								5321.37
response to dexamethasone	617.376	2400.5	2303.49																																								5321.37
regulation of cellular respiration	574.629	84.7329	36.234	3034.49	1589.51																																						5319.6
C21-steroid hormone biosynthetic process	2133.31	2081.34	1084.36																																								5299.01
C21-steroid hormone metabolic process	2133.31	2081.34	1084.36																																								5299.01
steroid hormone biosynthetic process	2133.31	2081.34	1084.36																																								5299.01
regulation of glycolytic process	36.234	1552.77	2437.42	1270.78																																							5297.21
regulation of carbohydrate catabolic process	36.234	1552.77	2437.42	1270.78																																							5297.21
positive regulation of endopeptidase activity	1460.46	2535.92	36.234	311.56	675.817	36.234	20.6961	192.349	25.08																																		5294.35
regulation of mast cell degranulation	2242.62	2085.24	20.6961	938.859																																							5287.41
regulation of mast cell activation involved in immune response	2242.62	2085.24	20.6961	938.859																																							5287.41
regulation of leukocyte degranulation	2242.62	2085.24	20.6961	938.859																																							5287.41
regulation of myeloid leukocyte mediated immunity	2242.62	2085.24	20.6961	938.859																																							5287.41
negative regulation of ATP metabolic process	1579.18	1552.77	2133.31																																								5265.26
circadian regulation of gene expression	938.859	1552.77	84.7329	938.859	84.7329	1663.91																																					5263.87
polyol metabolic process	592.296	36.234	675.817	938.859	938.859	2081.34																																					5263.4
regulation of purine nucleotide biosynthetic process	574.629	1579.18	2085.24	84.7329	938.859																																						5262.64
regulation of nucleotide biosynthetic process	574.629	1579.18	2085.24	84.7329	938.859																																						5262.64
regulation of heart rate	1316.14	2196.38	84.7329	0	1663.91																																						5261.16
regulation of cation channel activity	240.418	20.6961	1579.18	84.7329	1663.91	1665.86																																					5254.8
retina development in camera-type eye	36.234	704.056	704.056	1491.71	1508.48	107.376	698.331																																				5250.25
response to water	1888.99	1279.9	2081.34																																								5250.23
675.81658iary alcohol metabolic process	2081.34	1084.36	2081.34																																								5247.04
synaptic transmission, cholinergic	3267.22	36.234	1491.71	327.344	113.511																																						5236.02
lymphocyte activation involved in immune response	617.376	192.349	36.234	290.864	938.859	2272.87	84.7329	801.437																																			5234.73
cellular response to amyloid-beta	617.376	25.08	1579.18	1316.14	1568.82	86.68	36.234																																				5229.5
response to progesterone	1542.94	329.771	1215.76	2133.31																																							5221.78
receptor internalization	617.376	617.376	801.437	1491.71	20.6961	1663.91																																					5212.51
regulation of stem cell proliferation	36.234	290.864	675.817	2531.53	1663.91	0																																					5198.36
stem cell proliferation	36.234	290.864	675.817	2531.53	1663.91	0																																					5198.36
histone deacetylation	1556.98	2531.53	84.7329	84.7329	938.859																																						5196.84
protein deacetylation	1556.98	2531.53	84.7329	84.7329	938.859																																						5196.84
protein deacylation	1556.98	2531.53	84.7329	84.7329	938.859																																						5196.84
macromolecule deacylation	1556.98	2531.53	84.7329	84.7329	938.859																																						5196.84
positive regulation of telomerase activity	84.7329	538.395	1888.99	171.413	2508.56																																						5192.09
quinone metabolic process	2081.34	1023.59	2081.34																																								5186.27
regulation of type I interferon-mediated signaling pathway	938.859	1653.38	1653.38	938.859																																							5184.47
I-kappaB kinase/NF-kappaB signaling	2242.62	20.6961	20.6961	311.56	938.859	84.7329	309.613	36.234	84.7329	938.859	192.349																																5180.95
positive regulation of myeloid cell differentiation	36.234	1888.99	86.68	105.429	2444.85	617.376																																					5179.56
interleukin-2-mediated signaling pathway	938.859	2272.87	1943.62	20.6961																																							5176.05
cellular response to interleukin-2	938.859	2272.87	1943.62	20.6961																																							5176.05
response to interleukin-2	938.859	2272.87	1943.62	20.6961																																							5176.05
striatum development	290.864	2531.53	675.817	1663.91																																							5162.13
subpallium development	290.864	2531.53	675.817	1663.91																																							5162.13
columnar/cuboidal epithelial cell differentiation	36.234	84.7329	1542.94	1568.82	675.817	675.817	565.226																																				5149.59
positive regulation of blood circulation	617.376	0	2400.5	311.56	84.7329	1270.78	329.771	84.7329	36.234	0																																	5135.69
positive regulation of stress-activated MAPK cascade	20.6961	84.7329	36.234	938.859	1653.38	20.6961	1350.6	1023.59																																			5128.78
positive regulation of stress-activated protein kinase signaling cascade	20.6961	84.7329	36.234	938.859	1653.38	20.6961	1350.6	1023.59																																			5128.78
regulation of endoplasmic reticulum stress-induced intrinsic apoptotic signaling pathway	938.859	2531.53	1653.38																																								5123.77
positive regulation of cysteine-type endopeptidase activity	1460.46	2535.92	36.234	311.56	675.817	36.234	20.6961	25.08																																			5102
ER-nucleus signaling pathway	938.859	1568.82	1653.38	938.859																																							5099.91
positive regulation of interleukin-1 production	2535.92	36.234	2437.42	84.7329																																							5094.31
maternal placenta development	0	158.118	538.395	1004.13	1888.99	938.859	565.226																																				5093.71
negative regulation of wound healing	878.49	84.7329	2196.14	204.184	704.056	1023.59																																					5091.19
negative regulation of response to wounding	878.49	84.7329	2196.14	204.184	704.056	1023.59																																					5091.19
positive regulation of neuron death	86.68	1579.18	20.6961	1568.82	1794.97	36.234																																					5086.58
regulation of glucose metabolic process	938.859	938.859	1552.77	1568.82	86.68																																						5085.99
negative regulation of macrophage derived foam cell differentiation	1460.46	837.671	1552.77	1215.76																																							5066.66
positive regulation of cysteine-type endopeptidase activity involved in apoptotic process	1460.46	2535.92	36.234	311.56	675.817	20.6961	25.08																																				5065.77
positive regulation of vascular associated smooth muscle cell proliferation	240.418	2535.92	204.184	86.68	675.817	1316.14																																					5059.15
regulation of oxidative stress-induced cell death	36.234	862.952	1579.18	2531.53	36.234																																						5046.13
positive regulation of long-term synaptic potentiation	3267.22	1663.91	113.511																																								5044.64
positive regulation of macroautophagy	2242.62	36.234	538.395	2219.99																																							5037.24
regulation of deacetylase activity	1556.98	2531.53	938.859																																								5027.38
regulation of histone deacetylation	1556.98	2531.53	938.859																																								5027.38
regulation of protein deacetylation	1556.98	2531.53	938.859																																								5027.38
positive regulation of telomere capping	84.7329	538.395	1888.99	2508.56																																							5020.68
regulation of telomere capping	84.7329	538.395	1888.99	2508.56																																							5020.68
positive regulation of telomere maintenance via telomerase	84.7329	538.395	1888.99	2508.56																																							5020.68
positive regulation of telomere maintenance via telomere lengthening	84.7329	538.395	1888.99	2508.56																																							5020.68
positive regulation of telomere maintenance	84.7329	538.395	1888.99	2508.56																																							5020.68
regulation of telomere maintenance via telomerase	84.7329	538.395	1888.99	2508.56																																							5020.68
[truncated: 1,029 more rows]
